# Supplementary material for: Global landscape of phenazine biosynthesis and biodegradation reveals species-specific colonization patterns in agricultural soils and crop microbiomes
Source: eLife journal article supplement (doi:10.7554/elife.59726), 2020-09-15
Supplement: supp [file elife-59726-supp-v1.zip]

Archive with 14 entries (14 files):
- elife_poa_e59726_Supplementary_file_1.xlsx
- elife_poa_e59726_Supplementary_file_2.xlsx
- elife_poa_e59726_Supplementary_file_3.xlsx
- elife_poa_e59726_Supplementary_file_4.xlsx
- elife_poa_e59726_Supplementary_file_5.xlsx
- elife_poa_e59726_Transparent_Reporting_File.pdf
- elife_poa_e59726_Figure_2_figure_supplement_1.jpg
- elife_poa_e59726_Figure_2_figure_supplement_2.jpg
- elife_poa_e59726_Figure_3_figure_supplement_1.jpg
- elife_poa_e59726_Figure_4_figure_supplement_1.jpg
- elife_poa_e59726_Figure_4_figure_supplement_2.jpg
- elife_poa_e59726_Figure_4_figure_supplement_3.jpg
- elife_poa_e59726_Figure_5_figure_supplement_1.jpg
- elife_poa_e59726_Figure_5_figure_supplement_2.jpg
