# Supplementary material for: Global landscape of phenazine biosynthesis and biodegradation reveals species-specific colonization patterns in agricultural soils and crop microbiomes
Source: eLife journal article supplement (doi:10.7554/elife.59726), 2020-09-15
Supplement: supp [file elife-59726-supp-v1.zip › elife_poa_e59726_Supplementary_file_1.xlsx]

## Sheet: phz+ species database
Genome names and IDs		Phenazine biosynthesis genes (IMG ID)						Taxonomy
IMG genome ID	Species full name	phzA	phzB	phzD	phzE	phzF	phzG	Phylum	Class	Order	Family	Genus	Species
2731957574	Actinomadura latina NBRC 106108	2732252378	NA	2732252380	2732252381	2732252382	2732252383	Actinobacteria	Actinobacteria	Streptosporangiales	Thermomonosporaceae	Actinomadura	Actinomadura latina
2516493031	Actinopolyspora mortivallis HS-1, DSM 44261	NA	2516633708	2516633709	2516633710	2516633712	2516633713	Actinobacteria	Actinobacteria	Actinopolysporales	Actinopolysporaceae	Actinopolyspora	Actinopolyspora mortivallis
2634166628	Actinopolyspora saharensis DSM 45459	NA	2636174330	2636174331	2636174332	2636174334	2636174335	Actinobacteria	Actinobacteria	Actinopolysporales	Actinopolysporaceae	Actinopolyspora	Actinopolyspora saharensis
2648501773	Aeromonas popoffii CIP 105493	2651212624	NA	2651212625	2651212626	2651212627	2651212628	Proteobacteria	Gammaproteobacteria	Aeromonadales	Aeromonadaceae	Aeromonas	Aeromonas popoffii
2687453533	Alloactinosynnema sp. L-07	2689167593	NA	2689167588	2689167589	2689167592	2689167591	Actinobacteria	Actinobacteria	Pseudonocardiales	Pseudonocardiaceae	Alloactinosynnema	Alloactinosynnema sp. L-07
2515075013	Amycolatopsis nigrescens CSC17Ta-90, DSM 44992	2515137304	NA	2515137309	2515137308	2515137305	2515137306	Actinobacteria	Actinobacteria	Pseudonocardiales	Pseudonocardiaceae	Amycolatopsis	Amycolatopsis nigrescens
2574179710	Brenneria alni DSM 11811	2574221263	NA	2574221262	2574221261	2574221259	2574221258	Proteobacteria	Gammaproteobacteria	Enterobacterales	Pectobacteriaceae	Brenneria	Brenneria alni
2600255375	Brevibacterium iodinum ATCC 49514	2601963507	NA	2601963505	2601963504	2601963503	2601963502	Actinobacteria	Actinobacteria	Micrococcales	Brevibacteriaceae	Brevibacterium	Brevibacterium iodinum
2600255378	Brevibacterium linens ATCC 9172	2601976142	NA	2601976140	2601976139	2601976138	2601976137	Actinobacteria	Actinobacteria	Micrococcales	Brevibacteriaceae	Brevibacterium	Brevibacterium linens
2600255379	Brevibacterium aurantiacum ATCC9175	2601976901	NA	2601976903	2601976904	2601976905	2601976906	Actinobacteria	Actinobacteria	Micrococcales	Brevibacteriaceae	Brevibacterium	Brevibacterium aurantiacum
2600255384	Brevibacterium sp. P10	2601996319	NA	2601996321	2601996322	2601996323	2601996324	Actinobacteria	Actinobacteria	Micrococcales	Brevibacteriaceae	Brevibacterium	Brevibacterium sp.
637000051	Burkholderia cepacia 383	NA	637766417	637766418	637766419	637766420	637766421	Proteobacteria	Betaproteobacteria	Burkholderiales	Burkholderiaceae	Burkholderia	Burkholderia lata
643692013	Burkholderia glumae BGR1	NA	643877809	643877810	643877811	643877812	643877813	Proteobacteria	Betaproteobacteria	Burkholderiales	Burkholderiaceae	Burkholderia	Burkholderia glumae
2599185239	Burkholderia sp. NFACC38-1	NA	2599737480	2599737481	2599737482	2599737483	2599737484	Proteobacteria	Betaproteobacteria	Burkholderiales	Burkholderiaceae	Burkholderia	Burkholderia sp. NFACC38-1
2636415719	Burkholderia glumae NCPPB 3923	NA	2637718632	2637718631	2637718630	2637718629	2637718628	Proteobacteria	Betaproteobacteria	Burkholderiales	Burkholderiaceae	Burkholderia	Burkholderia glumae
2648501169	Burkholderia glumae ATCC 33617	NA	2648806602	2648806601	2648806600	2648806599	2648806598	Proteobacteria	Betaproteobacteria	Burkholderiales	Burkholderiaceae	Burkholderia	Burkholderia glumae
2754412323	Burkholderia singularis TSV85	2754520992	NA	2754521006	2754521005	2754520996	2754520997	Proteobacteria	Betaproteobacteria	Burkholderiales	Burkholderiaceae	Burkholderia	Burkholderia singularis
2754412390	Burkholderia sp. BDU5	NA	2754958138	2754958139	2754958140	2754958141	2754958142	Proteobacteria	Betaproteobacteria	Burkholderiales	Burkholderiaceae	Burkholderia	Burkholderia sp. BDU5
2791355334	Burkholderia sp. AU33423	2793624298	NA	2793624297	2793624296	2793624295	2793624294	Proteobacteria	Betaproteobacteria	Burkholderiales	Burkholderiaceae	Burkholderia	Burkholderia sp. AU33423
2791355335	Burkholderia sp. HI2714	2793631422	NA	2793631423	2793631424	2793631425	2793631426	Proteobacteria	Betaproteobacteria	Burkholderiales	Burkholderiaceae	Burkholderia	Burkholderia sp. HI2714
2808606896	Burkholderia lata FL-7-5-30-S1-D0	2811372127	NA	2811372126	2811372125	2811372124	2811372123	Proteobacteria	Betaproteobacteria	Burkholderiales	Burkholderiaceae	Burkholderia	Burkholderia lata
2556921674	Dyella japonica UNC79MFTsu3.2	2558296756	NA	2558296751	2558296752	2558296755	2558296754	Proteobacteria	Gammaproteobacteria	Xanthomonadales	Rhodanobacteraceae	Dyella	Dyella japonica
2593339196	Dyella marensis UNC178MFTsu3.1	2595309371	NA	2595309366	2595309367	2595309370	2595309369	Proteobacteria	Gammaproteobacteria	Xanthomonadales	Rhodanobacteraceae	Dyella	Dyella marensis
2718218134	Escherichia coli M11	NA	2720235419	2720235420	2720235421	2720235423	2720235424	Proteobacteria	Gammaproteobacteria	Enterobacterales	Enterobacteriaceae	Escherichia	Escherichia coli
2728369396	Escherichia coli M15	NA	2730291217	2730291218	2730291219	2730291221	2730291222	Proteobacteria	Gammaproteobacteria	Enterobacterales	Enterobacteriaceae	Escherichia	Escherichia coli
2595698251	Kibdelosporangium aridum DSM 43828	2596421943	NA	2596421949	2596421948	2596421944	2596421946	Actinobacteria	Actinobacteria	Pseudonocardiales	Pseudonocardiaceae	Kibdelosporangium	Kibdelosporangium aridum
2524614568	Kitasatospora sp. SolWspMP-SS2h	2524977515	NA	2524977514	2524977513	2524977512	2524977511	Actinobacteria	Actinobacteria	Streptomycetales	Streptomycetaceae	Kitasatospora	Kitasatospora sp. SolWspMP-SS2h
2767802052	Kitasatospora purpeofusca NRRL B-1817	2768194013	2768194019	2768194015	2768194016	2768194017	2768194018	Actinobacteria	Actinobacteria	Streptomycetales	Streptomycetaceae	Kitasatospora	Kitasatospora purpeofusca
2548877030	Kocuria atrinae C3-8	NA	2550855358	2550855357	2550855356	2550855354	2550855353	Actinobacteria	Actinobacteria	Micrococcales	Micrococcaceae	Kocuria	Kocuria atrinae
2713896981	Kocuria varians G6	2715097854	NA	2715097852	2715097851	2715097855	NA	Actinobacteria	Actinobacteria	Micrococcales	Micrococcaceae	Kocuria	Kocuria varians
2684623061	Lysobacter antibioticus 76	2686640729	NA	2686640734	2686640733	2686640730	2686640731	Proteobacteria	Gammaproteobacteria	Xanthomonadales	Xanthomonadaceae	Lysobacter	Lysobacter antibioticus
2687453248	Lysobacter antibioticus ATCC 29479	2688037805	NA	2688037800	2688037801	2688037804	2688037803	Proteobacteria	Gammaproteobacteria	Xanthomonadales	Xanthomonadaceae	Lysobacter	Lysobacter antibioticus
2671180292	Microbispora sp. GMKU363 GMKU 363	2672170174	NA	2672170175	2672170176	2672170177	2672170178	Actinobacteria	Actinobacteria	Streptosporangiales	Streptosporangiaceae	Microbispora	Microbispora sp. GMKU363
2519899636	Microbulbifer variabilis ATCC 700307	NA	2520453957	2520453958	2520453959	2520453961	2520453962	Proteobacteria	Gammaproteobacteria	Cellvibrionales	Microbulbiferaceae	Microbulbifer	Microbulbifer variabilis
2622736591	Micromonospora matsumotoense DSM 44100	2623446341	NA	2623446336	2623446337	2623446343	2623446339	Actinobacteria	Actinobacteria	Micromonosporales	Micromonosporaceae	Micromonospora	Micromonospora matsumotoense
2623620524	Micromonospora yangpuensis DSM 45577	2624781706	NA	2624781711	2624781710	2624781704	2624781708	Actinobacteria	Actinobacteria	Micromonosporales	Micromonosporaceae	Micromonospora	Micromonospora yangpuensis
2728369162	Micromonospora rosaria DSM 803	2729449640	NA	2729449647	2729449646	2729449639	2729449642	Actinobacteria	Actinobacteria	Micromonosporales	Micromonosporaceae	Micromonospora	Micromonospora rosaria
2597490371	Nannocystis exedens ATCC 25963	NA	2599156733	2599156734	2599156735	2599156737	2599156738	Proteobacteria	Deltaproteobacteria	Myxococcales	Nannocystaceae	Nannocystis	Nannocystis exedens
2767802756	Nannocystis exedens DSM 71	NA	2770859288	2770859287	2770859286	2770859284	2770859283	Proteobacteria	Deltaproteobacteria	Myxococcales	Nannocystaceae	Nannocystis	Nannocystis exedens
2521172603	Nocardia sp. BMG111209	NA	2521594713	2521594711	2521594710	2521594709	2521594708	Actinobacteria	Actinobacteria	Corynebacteriales	Nocardiaceae	Nocardia	Nocardia sp. BMG111209
2645728039	Nocardia arizonensis W9405	NA	2648051754	2648051756	2648051757	2648051759	2648051760	Actinobacteria	Actinobacteria	Corynebacteriales	Nocardiaceae	Nocardia	Nocardia arizonensis
2740892223	Nocardia arizonensis NBRC 108935	NA	2742561275	2742561273	2742561272	2742561270	2742561269	Actinobacteria	Actinobacteria	Corynebacteriales	Nocardiaceae	Nocardia	Nocardia arizonensis
646564557	Nocardiopsis dassonvillei dassonvillei DSM 43111	646841107	NA	646841109	646841110	646841111	646841112	Actinobacteria	Actinobacteria	Streptosporangiales	Nocardiopsaceae	Nocardiopsis	Nocardiopsis dassonvillei
2515154089	Nocardiopsis sp. CNT312	2515498984	NA	2515498982	2515498981	2515498980	2515498979	Actinobacteria	Actinobacteria	Streptosporangiales	Nocardiopsaceae	Nocardiopsis	Nocardiopsis sp. CNT312
2519899670	Nocardiopsis sp. CNS639	2520569895	NA	2520569893	2520569892	2520569891	2520569890	Actinobacteria	Actinobacteria	Streptosporangiales	Nocardiopsaceae	Nocardiopsis	Nocardiopsis sp. CNS-639
2551306678	Nocardiopsis chromatogenes YIM 90109	2554028225	NA	2554028229	2554028228	2554028223	2554028226	Actinobacteria	Actinobacteria	Streptosporangiales	Nocardiopsaceae	Nocardiopsis	Nocardiopsis chromatogenes
2554235470	Nocardiopsis halophila DSM 44494	NA	2556069396	2556071145	2556071144	2556069394	2556069393	Actinobacteria	Actinobacteria	Streptosporangiales	Nocardiopsaceae	Nocardiopsis	Nocardiopsis halophila
2617271107	Pantoea agglomerans 190	NA	2618807675	2618807674	2618807673	2618807672	2618807671	Proteobacteria	Gammaproteobacteria	Enterobacterales	Erwiniaceae	Pantoea	Pantoea agglomerans
2651870170	Paraburkholderia phenazinium LMG 2247	2654004012	NA	2654004009	2654004010	2654004011	2654004007	Proteobacteria	Betaproteobacteria	Burkholderiales	Burkholderiaceae	Paraburkholderia	Paraburkholderia phenazinium
2576861483	Pectobacterium atrosepticum JG10-08	2578497230	NA	2578497229	2578497228	2578497226	2578497225	Proteobacteria	Gammaproteobacteria	Enterobacterales	Pectobacteriaceae	Pectobacterium	Pectobacterium atrosepticum
2597490164	Pectobacterium atrosepticum 21a	2598562996	NA	2598562995	2598562994	2598562992	2598562991	Proteobacteria	Gammaproteobacteria	Enterobacterales	Pectobacteriaceae	Pectobacterium	Pectobacterium atrosepticum
2627853866	Pectobacterium atrosepticum ICMP 1526	2629293483	NA	2629293482	2629293481	2629293479	2629293478	Proteobacteria	Gammaproteobacteria	Enterobacterales	Pectobacteriaceae	Pectobacterium	Pectobacterium atrosepticum
2627854199	Pectobacterium carotovorum actinidiae KKH3	2630607923	NA	2630607924	2630607925	2630607927	2630607928	Proteobacteria	Gammaproteobacteria	Enterobacterales	Pectobacteriaceae	Pectobacterium	Pectobacterium carotovorum
2651869836	Pectobacterium carotovorum brasiliensis NZEC1	NA	2653045401	2653045400	2653045399	2653045397	2653045396	Proteobacteria	Gammaproteobacteria	Enterobacterales	Pectobacteriaceae	Pectobacterium	Pectobacterium carotovorum
2740892408	Pectobacterium atrosepticum NCPPB 549	2743310490	NA	2743310489	2743310488	2743310486	2743310485	Proteobacteria	Gammaproteobacteria	Enterobacterales	Pectobacteriaceae	Pectobacterium	Pectobacterium atrosepticum
2740892409	Pectobacterium betavasculorum NCPPB 2793	2743315169	NA	2743315168	2743315167	2743315165	2743315164	Proteobacteria	Gammaproteobacteria	Enterobacterales	Pectobacteriaceae	Pectobacterium	Pectobacterium betavasculorum
2740892410	Pectobacterium betavasculorum NCPPB 2795	2743318994	NA	2743318995	2743318996	2743318998	2743318999	Proteobacteria	Gammaproteobacteria	Enterobacterales	Pectobacteriaceae	Pectobacterium	Pectobacterium betavasculorum
2740892411	Pectobacterium carotovorum carotovorum NCPPB 3395	NA	2743326891	2743326890	2743326889	2743326888	2743326887	Proteobacteria	Gammaproteobacteria	Enterobacterales	Pectobacteriaceae	Pectobacterium	Pectobacterium polaris
2740892412	Pectobacterium atrosepticum NCPPB 3404	2743327176	NA	2743327177	2743327178	2743327180	2743327181	Proteobacteria	Gammaproteobacteria	Enterobacterales	Pectobacteriaceae	Pectobacterium	Pectobacterium atrosepticum
2524614658	Photobacterium halotolerans DSM 18316	NA	2525299878	2525299879	2525299880	2525299881	2525299882	Proteobacteria	Gammaproteobacteria	Vibrionales	Vibrionaceae	Photobacterium	Photobacterium halotolerans
639279310	Pseudomonas aeruginosa UCBPP-PA14	639323320	639323319	639323317	639323316	639323315	639323314	Proteobacteria	Gammaproteobacteria	Pseudomonadales	Pseudomonadaceae	Pseudomonas	Pseudomonas aeruginosa
2502790010	Pseudomonas aeruginosa	2502836178	2502836177	2502836175	2502836174	2502837715	2502837714	Proteobacteria	Gammaproteobacteria	Pseudomonadales	Pseudomonadaceae	Pseudomonas	Pseudomonas aeruginosa
2579778585	Pseudomonas aeruginosa 6077	2580128649	2580128648	2580128646	2580128645	2580128644	2580128643	Proteobacteria	Gammaproteobacteria	Pseudomonadales	Pseudomonadaceae	Pseudomonas	Pseudomonas aeruginosa
2582580891	Pseudomonas chlororaphis YL-1	2583794598	2583794599	2583794601	2583794602	2583794603	2583794604	Proteobacteria	Gammaproteobacteria	Pseudomonadales	Pseudomonadaceae	Pseudomonas	Pseudomonas chlororaphis
2597489885	Pseudomonas chlororaphis O6	2597848220	2597848221	2597848223	2597848224	2597848225	2597848226	Proteobacteria	Gammaproteobacteria	Pseudomonadales	Pseudomonadaceae	Pseudomonas	Pseudomonas chlororaphis
2597489887	Pseudomonas chlororaphis aureofaciens 30-84	2597860168	2597860169	2597860171	2597860172	2597860173	2597860174	Proteobacteria	Gammaproteobacteria	Pseudomonadales	Pseudomonadaceae	Pseudomonas	Pseudomonas chlororaphis
2599185185	Pseudomonas sp. NFPP07	2599483006	2599483007	2599483009	2599483010	2599483011	2599483012	Proteobacteria	Gammaproteobacteria	Pseudomonadales	Pseudomonadaceae	Pseudomonas	Pseudomonas sp. NFPP07
2599185257	Pseudomonas sp. NFACC41-3	2599803274	2599803273	2599803271	2599803270	2599803269	2599803268	Proteobacteria	Gammaproteobacteria	Pseudomonadales	Pseudomonadaceae	Pseudomonas	Pseudomonas sp. NFACC41-3
2600255231	Pseudomonas aeruginosa 18A	2601455450	2601455449	2601455447	2601455446	2601455445	2601455444	Proteobacteria	Gammaproteobacteria	Pseudomonadales	Pseudomonadaceae	Pseudomonas	Pseudomonas aeruginosa
2615840572	Pseudomonas aeruginosa 14650	2616101221	2616101248	2616101252	2616101253	2616101254	2616101257	Proteobacteria	Gammaproteobacteria	Pseudomonadales	Pseudomonadaceae	Pseudomonas	Pseudomonas aeruginosa
2617270790	Pseudomonas chlororaphis chlororaphis ATCC 9446	2617544279	2617544278	2617544276	2617544275	2617544274	2617544273	Proteobacteria	Gammaproteobacteria	Pseudomonadales	Pseudomonadaceae	Pseudomonas	Pseudomonas chlororaphis
2617271287	Pseudomonas sp. YS-1p	2619403836	2619403837	2619405246	2619405247	2619405248	2619405249	Proteobacteria	Gammaproteobacteria	Pseudomonadales	Pseudomonadaceae	Pseudomonas	Pseudomonas sp. YS-1p
2627853942	Pseudomonas aeruginosa 213BR	2629593654	2629593655	2629593657	2629593658	2629593659	2629593660	Proteobacteria	Gammaproteobacteria	Pseudomonadales	Pseudomonadaceae	Pseudomonas	Pseudomonas aeruginosa
2630968837	Pseudomonas fluorescens PA3G8	2633441547	2633441548	2633441550	2633441551	2633441552	2633441553	Proteobacteria	Gammaproteobacteria	Pseudomonadales	Pseudomonadaceae	Pseudomonas	Pseudomonas sp. PA3G8
2636416019	Pseudomonas chlororaphis aurantiaca LMG 21630	2638965410	2638965409	2638965407	2638965406	2638965405	2638965404	Proteobacteria	Gammaproteobacteria	Pseudomonadales	Pseudomonadaceae	Pseudomonas	Pseudomonas chlororaphis
2636416064	Pseudomonas chlororaphis aureofaciens ATCC 13985	2639113254	2639113253	2639113251	2639113250	2639113249	2639113248	Proteobacteria	Gammaproteobacteria	Pseudomonadales	Pseudomonadaceae	Pseudomonas	Pseudomonas chlororaphis
2636416169	Pseudomonas libanensis DSM 17149	2639628352	2639628353	2639628355	2639628356	2639628357	2639628358	Proteobacteria	Gammaproteobacteria	Pseudomonadales	Pseudomonadaceae	Pseudomonas	Pseudomonas libanensis
2636416176	Pseudomonas lini DSM 16768	2639661110	2639661111	2639661113	2639661114	2639661115	2639661116	Proteobacteria	Gammaproteobacteria	Pseudomonadales	Pseudomonadaceae	Pseudomonas	Pseudomonas lini
2636416190	Pseudomonas orientalis LMG 23660	2639740111	2639740112	2639740114	2639740115	2639740116	2639740117	Proteobacteria	Gammaproteobacteria	Pseudomonadales	Pseudomonadaceae	Pseudomonas	Pseudomonas orientalis
2639762904	Pseudomonas fluorescens LBUM223	2641199181	2641199182	2641199184	2641199185	2641199186	2641199187	Proteobacteria	Gammaproteobacteria	Pseudomonadales	Pseudomonadaceae	Pseudomonas	Pseudomonas fluorescens
2643221571	Pseudomonas sp. Root569	2643874179	2643874178	2643874176	2643874175	2643874174	2643874173	Proteobacteria	Gammaproteobacteria	Pseudomonadales	Pseudomonadaceae	Pseudomonas	Pseudomonas sp. Root569
2645727751	Pseudomonas chlororaphis aureofaciens NBRC 3521	2646810117	2646810116	2646810114	2646810113	2646810112	2646810111	Proteobacteria	Gammaproteobacteria	Pseudomonadales	Pseudomonadaceae	Pseudomonas	Pseudomonas chlororaphis
2648501301	Pseudomonas libanensis RIT-PI-g	2649357376	2649357375	2649357373	2649357372	2649357371	2649357370	Proteobacteria	Gammaproteobacteria	Pseudomonadales	Pseudomonadaceae	Pseudomonas	Pseudomonas libanensis
2648501651	Pseudomonas lini ZBG1	2650683740	2650683739	2650683737	2650683736	2650683735	2650683734	Proteobacteria	Gammaproteobacteria	Pseudomonadales	Pseudomonadaceae	Pseudomonas	Pseudomonas lini
2648501755	Pseudomonas batumici UCM B-321	2651144785	2651144784	2651144782	2651144781	2651144780	2651144779	Proteobacteria	Gammaproteobacteria	Pseudomonadales	Pseudomonadaceae	Pseudomonas	Pseudomonas batumici
2660238513	Pseudomonas synxantha DSM 18928	2662689576	2662689575	2662689573	2662689572	2662689571	2662689570	Proteobacteria	Gammaproteobacteria	Pseudomonadales	Pseudomonadaceae	Pseudomonas	Pseudomonas synxantha
2663762900	Pseudomonas orientalis DSM 17489	2664869131	2664869132	2664869134	2664869135	2664869136	2664869137	Proteobacteria	Gammaproteobacteria	Pseudomonadales	Pseudomonadaceae	Pseudomonas	Pseudomonas orientalis
2663763025	Pseudomonas lini DSM 16768	2665348322	2665348323	2665348325	2665348326	2665348327	2665348328	Proteobacteria	Gammaproteobacteria	Pseudomonadales	Pseudomonadaceae	Pseudomonas	Pseudomonas lini
2667527385	Pseudomonas synxantha LMG 2190	2667942969	2667942968	2667942966	2667942965	2667942964	2667942963	Proteobacteria	Gammaproteobacteria	Pseudomonadales	Pseudomonadaceae	Pseudomonas	Pseudomonas synxantha
2667528168	Pseudomonas yamanorum LMG 27247	2671084348	2671084349	2671084351	2671084352	2671084353	2671084354	Proteobacteria	Gammaproteobacteria	Pseudomonadales	Pseudomonadaceae	Pseudomonas	Pseudomonas yamanorum
2667528180	Pseudomonas chlororaphis piscium DSM 21509	2671147055	2671147054	2671147052	2671147051	2671147050	2671147049	Proteobacteria	Gammaproteobacteria	Pseudomonadales	Pseudomonadaceae	Pseudomonas	Pseudomonas chlororaphis
2671180172	Pseudomonas sp. NFIX51	2671771153	2671771154	2671771156	2671771157	2671771158	2671771159	Proteobacteria	Gammaproteobacteria	Pseudomonadales	Pseudomonadaceae	Pseudomonas	Pseudomonas sp. NFIX51
2681813132	Pseudomonas putida FDAARGOS 121	2682990291	2682990292	2682990294	2682990295	2682990296	2682990297	Proteobacteria	Gammaproteobacteria	Pseudomonadales	Pseudomonadaceae	Pseudomonas	Pseudomonas putida
2684623235	Pseudomonas aeruginosa 12-4-4(59)	2687297475	2687297474	2687297472	2687297471	2687297470	2687297469	Proteobacteria	Gammaproteobacteria	Pseudomonadales	Pseudomonadaceae	Pseudomonas	Pseudomonas aeruginosa
2684623237	Pseudomonas fluorescens LBUM636	2687310287	2687310286	2687310284	2687310283	2687310282	2687310281	Proteobacteria	Gammaproteobacteria	Pseudomonadales	Pseudomonadaceae	Pseudomonas	Pseudomonas fluorescens
2687453548	Pseudomonas chlororaphis 189	2689237192	2689237193	2689237195	2689237196	2689237197	2689237198	Proteobacteria	Gammaproteobacteria	Pseudomonadales	Pseudomonadaceae	Pseudomonas	Pseudomonas chlororaphis
2700989493	Pseudomonas libanensis DSM 17149	2702912709	2702912708	2702912706	2702912705	2702912704	2702912703	Proteobacteria	Gammaproteobacteria	Pseudomonadales	Pseudomonadaceae	Pseudomonas	Pseudomonas libanensis
2703719185	Pseudomonas sp. LE6C9	2705821198	2705821199	2705821201	2705821202	2705821203	2705821204	Proteobacteria	Gammaproteobacteria	Pseudomonadales	Pseudomonadaceae	Pseudomonas	unclassified
2713897220	Pseudomonas sp. CMR5c	2716090597	2716090596	2716090594	2716090593	2716090592	2716090591	Proteobacteria	Gammaproteobacteria	Pseudomonadales	Pseudomonadaceae	Pseudomonas	Pseudomonas sp. CMR5c
2713897221	Pseudomonas chlororaphis aureofaciens LMG 1245	2716101866	2716101867	2716101869	2716101870	2716101871	2716101872	Proteobacteria	Gammaproteobacteria	Pseudomonadales	Pseudomonadaceae	Pseudomonas	Pseudomonas chlororaphis
2713897222	Pseudomonas chlororaphis aureofaciens CD	2716108054	2716108055	2716108057	2716108058	2716108059	2716108060	Proteobacteria	Gammaproteobacteria	Pseudomonadales	Pseudomonadaceae	Pseudomonas	Pseudomonas chlororaphis
2713897223	Pseudomonas chlororaphis chlororaphis LMG 5004	2716114073	2716114074	2716114076	2716114077	2716114078	2716114079	Proteobacteria	Gammaproteobacteria	Pseudomonadales	Pseudomonadaceae	Pseudomonas	Pseudomonas chlororaphis
2724679032	Pseudomonas aeruginosa 0C2E	2725158502	2725158503	2725158505	2725158506	2725158507	2725158508	Proteobacteria	Gammaproteobacteria	Pseudomonadales	Pseudomonadaceae	Pseudomonas	Pseudomonas aeruginosa
2724679038	Pseudomonas aeruginosa 0C4A	2725190821	2725190820	2725190818	2725190817	2725190816	2725190815	Proteobacteria	Gammaproteobacteria	Pseudomonadales	Pseudomonadaceae	Pseudomonas	Pseudomonas aeruginosa
2724679066	Pseudomonas aeruginosa 105819	2725313557	2725313556	2725313554	2725313553	2725313552	2725313551	Proteobacteria	Gammaproteobacteria	Pseudomonadales	Pseudomonadaceae	Pseudomonas	Pseudomonas aeruginosa
2731639261	Pseudomonas asplenii ES PA-B8	2731954126	2731954125	2731954123	2731954122	2731954121	2731954120	Proteobacteria	Gammaproteobacteria	Pseudomonadales	Pseudomonadaceae	Pseudomonas	Pseudomonas asplenii
2734482072	Pseudomonas asplenii ES PA-B6	2735132898	2735132897	2735132895	2735132894	2735132893	2735132892	Proteobacteria	Gammaproteobacteria	Pseudomonadales	Pseudomonadaceae	Pseudomonas	Pseudomonas asplenii
2734482259	Pseudomonas asplenii ES FE-G7	2735818742	2735818743	2735818745	2735818746	2735818747	2735818748	Proteobacteria	Gammaproteobacteria	Pseudomonadales	Pseudomonadaceae	Pseudomonas	Pseudomonas asplenii
2740892503	Pseudomonas chlororaphis piscium PCL1391	2743739713	2743739714	2743739716	2743739717	2743739718	2743739719	Proteobacteria	Gammaproteobacteria	Pseudomonadales	Pseudomonadaceae	Pseudomonas	Pseudomonas chlororaphis
2756170262	Pseudomonas sp. LE5F10	2756733451	2756733450	2756733448	2756733447	2756733446	2756733445	Proteobacteria	Gammaproteobacteria	Pseudomonadales	Pseudomonadaceae	Pseudomonas	unclassified
2767802246	Pseudomonas denitrificans 466 PDEN	2769376848	2769378471	2769378473	2769378474	2769378475	2769378476	Proteobacteria	Gammaproteobacteria	Pseudomonadales	Pseudomonadaceae	Pseudomonas	Pseudomonas denitrificans
2767802249	Pseudomonas denitrificans 817 PDEN	2769397393	2769397394	2769397396	2769397397	2769397398	2769397399	Proteobacteria	Gammaproteobacteria	Pseudomonadales	Pseudomonadaceae	Pseudomonas	Pseudomonas denitrificans
2767802252	Pseudomonas denitrificans 481.rep1 PDEN	2769418986	2769414639	2769414641	2769414642	2769414643	2769414644	Proteobacteria	Gammaproteobacteria	Pseudomonadales	Pseudomonadaceae	Pseudomonas	Pseudomonas denitrificans
2767802253	Pseudomonas denitrificans 1332 PDEN	2769419986	2769421811	2769421809	2769421808	2769421807	2769421806	Proteobacteria	Gammaproteobacteria	Pseudomonadales	Pseudomonadaceae	Pseudomonas	Pseudomonas denitrificans
2767802255	Pseudomonas denitrificans 1184 PDEN	2769434396	2769435583	2769435581	2769435580	2769435579	2769435578	Proteobacteria	Gammaproteobacteria	Pseudomonadales	Pseudomonadaceae	Pseudomonas	Pseudomonas denitrificans
2767802257	Pseudomonas denitrificans 293 PDEN	2769452234	2769448229	2769448231	2769448232	2769448233	2769448234	Proteobacteria	Gammaproteobacteria	Pseudomonadales	Pseudomonadaceae	Pseudomonas	Pseudomonas denitrificans
2767802260	Pseudomonas denitrificans 461 PDEN	2769467335	2769468624	2769468626	2769468627	2769468628	2769468629	Proteobacteria	Gammaproteobacteria	Pseudomonadales	Pseudomonadaceae	Pseudomonas	Pseudomonas denitrificans
2775507205	Pseudomonas sp. 09C 129	2777911782	2777911783	2777911785	2777911786	2777911787	2777911788	Proteobacteria	Gammaproteobacteria	Pseudomonadales	Pseudomonadaceae	Pseudomonas	Pseudomonas sp. 09C 129
2615840625	Rhodococcus enclensis NIO-1009	2616305471	NA	2616305473	2616305474	2616305475	2616305476	Actinobacteria	Actinobacteria	Corynebacteriales	Nocardiaceae	Rhodococcus	Rhodococcus enclensis
2630968954	Rhodococcus erythropolis CAS922i	2633905086	NA	2633905084	2633905083	2633905082	2633905081	Actinobacteria	Actinobacteria	Corynebacteriales	Nocardiaceae	Rhodococcus	Rhodococcus erythropolis
2772190761	Rhodococcus rhodnii NRRL B-16535	2772879417	NA	2772879423	2772879422	2772879418	2772879420	Actinobacteria	Actinobacteria	Corynebacteriales	Nocardiaceae	Rhodococcus	Rhodococcus rhodnii
2602041553	Serratia fonticola AU-P3(3)	NA	2602164052	2602164053	2602164054	2602164056	2602164057	Proteobacteria	Gammaproteobacteria	Enterobacterales	Yersiniaceae	Serratia	Serratia fonticola
2602041585	Serratia fonticola LMG 7882	NA	2602306447	2602306446	2602306444	2602306442	2602306441	Proteobacteria	Gammaproteobacteria	Enterobacterales	Yersiniaceae	Serratia	Serratia fonticola
2636415821	Serratia fonticola DSM 4576	NA	2638151899	2638151898	2638151897	2638151895	2638151894	Proteobacteria	Gammaproteobacteria	Enterobacterales	Yersiniaceae	Serratia	Serratia fonticola
651717110	Streptomyces anulatus 9663	651727258	NA	651727262	651727261	651727260	651727259	Actinobacteria	Actinobacteria	Streptomycetales	Streptomycetaceae	Streptomyces	Streptomyces anulatus
2515154205	Streptomyces sp. CNH099	2516097924	2516097921	2516097919	2516097918	2516097916	2516097915	Actinobacteria	Actinobacteria	Streptomycetales	Streptomycetaceae	Streptomyces	Streptomyces sp. CNH099
2515154206	Streptomyces sp. CNT371	2516108109	2516108111	2516108113	2516108114	2516108115	2516108116	Actinobacteria	Actinobacteria	Streptomycetales	Streptomycetaceae	Streptomyces	Streptomyces sp. CNT371
2516493006	Streptomyces purpureus KA281, ATCC 21405	2516515599	NA	2516515604	2516515603	2516515594	2516515601	Actinobacteria	Actinobacteria	Streptomycetales	Streptomycetaceae	Streptomyces	Streptomyces purpureus
2517572165	Streptomyces sp. CNQ766	2518002744	2518002746	2518002748	2518002749	2518002750	2518002751	Actinobacteria	Actinobacteria	Streptomycetales	Streptomycetaceae	Streptomyces	Streptomyces sp. CNQ766
2517572166	Streptomyces sp. CNS335	2518010996	2518010994	2518010992	2518010991	2518010990	2518010989	Actinobacteria	Actinobacteria	Streptomycetales	Streptomycetaceae	Streptomyces	Streptomyces sp. CNS335
2518285535	Streptomyces sp. CNB091	NA	2518395316	2518395314	2518395313	2518395312	2518395311	Actinobacteria	Actinobacteria	Streptomycetales	Streptomycetaceae	Streptomyces	Streptomyces sp. CNB091
2518285564	Streptomyces sp. CNY243	2518513183	2518513185	2518513187	2518513188	2518513189	2518513190	Actinobacteria	Actinobacteria	Streptomycetales	Streptomycetaceae	Streptomyces	Streptomyces sp. CNY243
2521172626	Streptomyces sp. 303MFCol5.2	2521683698	NA	2521683702	2521683701	2521683700	2521683699	Actinobacteria	Actinobacteria	Streptomycetales	Streptomycetaceae	Streptomyces	Streptomyces sp. 303MFCol5.2
2524023245	Streptomyces sp. CNH287	2524584980	NA	2524584975	2524584976	2524584979	2524584978	Actinobacteria	Actinobacteria	Streptomycetales	Streptomycetaceae	Streptomyces	Streptomyces sp. CNH287
2524023247	Streptomyces sp. CNQ865	2524596592	2524596594	2524596596	2524596597	2524596598	2524596599	Actinobacteria	Actinobacteria	Streptomycetales	Streptomycetaceae	Streptomyces	Streptomyces sp. CNQ865
2528311045	Streptomyces sp. CNQ329	NA	2528486457	2528486459	2528486460	2528486461	2528486462	Actinobacteria	Actinobacteria	Streptomycetales	Streptomycetaceae	Streptomyces	Streptomyces sp. CNQ329
2558860984	Streptomyces sp. CNB632	2561470564	2561470566	2561470568	2561470569	2561470571	2561470572	Actinobacteria	Actinobacteria	Streptomycetales	Streptomycetaceae	Streptomyces	Streptomyces sp. CNB632
2558860985	Streptomyces sp. CNX435	2561478008	2561478004	2561478002	2561478001	2561477999	2561477998	Actinobacteria	Actinobacteria	Streptomycetales	Streptomycetaceae	Streptomyces	Streptomyces sp. CNX435
2561511090	Streptomyces sp. URHA0041	2562035668	NA	NA	2562035667	2562035665	2562035664	Actinobacteria	Actinobacteria	Streptomycetales	Streptomycetaceae	Streptomyces	Streptomyces sp. URHA0041
2561511112	Streptomyces sp. CNQ-525	2562118561	2562118563	2562118565	2562118566	2562118567	2562118568	Actinobacteria	Actinobacteria	Streptomycetales	Streptomycetaceae	Streptomyces	Streptomyces sp. CNQ-525
2582581517	Streptomyces cinnamonensis DSM 1042	2585373488	NA	NA	2585373491	2585373490	2585373492	Actinobacteria	Actinobacteria	Streptomycetales	Streptomycetaceae	Streptomyces	Streptomyces cinnamonensis
2582581520	Streptomyces iakyrus DSM 41873	2585373648	2585373650	2585373652	2585373653	2585373646	2585373647	Actinobacteria	Actinobacteria	Streptomycetales	Streptomycetaceae	Streptomyces	Streptomyces iakyrus
2582581706	Streptomyces griseoluteus P510	NA	2585376757	2585376759	2585376760	2585376761	2585376762	Actinobacteria	Actinobacteria	Streptomycetales	Streptomycetaceae	Streptomyces	Streptomyces griseoluteus
2582581763	Streptomyces antibioticus Tu 2706	2585378034	NA	2585378043	2585378042	2585378040	2585378036	Actinobacteria	Actinobacteria	Streptomycetales	Streptomycetaceae	Streptomyces	Streptomyces antibioticus
2582581765	Streptomyces tendae Tue1028	2585378092	2585378098	2585378094	2585378095	2585378096	2585378097	Actinobacteria	Actinobacteria	Streptomycetales	Streptomycetaceae	Streptomyces	Streptomyces tendae
2606217189	Streptomyces sp. 2AW	2606549079	NA	2606549083	2606549082	2606549081	2606549080	Actinobacteria	Actinobacteria	Streptomycetales	Streptomycetaceae	Streptomyces	unclassified
2617271283	Streptomyces luteus TRM45540	NA	2619386607	2619386602	2619386603	2619386604	2619386605	Actinobacteria	Actinobacteria	Streptomycetales	Streptomycetaceae	Streptomyces	Streptomyces luteus
2634166484	Streptomyces odonnellii NRRL B-24891	2635875006	NA	2635876044	2635876043	2635875005	2635875004	Actinobacteria	Actinobacteria	Streptomycetales	Streptomycetaceae	Streptomyces	Streptomyces odonnellii
2636415441	Streptomyces caatingaensis CMAA 1322	2636589225	NA	2636589227	2636589228	2636589229	2636589230	Actinobacteria	Actinobacteria	Streptomycetales	Streptomycetaceae	Streptomyces	Streptomyces caatingaensis
2643221678	Streptomyces sp. Root1310	2644440268	2644440261	2644440266	2644440264	2644440263	2644440262	Actinobacteria	Actinobacteria	Streptomycetales	Streptomycetaceae	Streptomyces	Streptomyces sp. Root1310
2654587513	Streptomyces sp. CNQ-509	NA	2654645673	2654645678	2654645679	2654645680	2654645681	Actinobacteria	Actinobacteria	Streptomycetales	Streptomycetaceae	Streptomyces	Streptomyces sp. CNQ-509
2657245726	Streptomyces sp. MnatMP-M17	2660203349	NA	2660203353	2660203352	2660203350	NA	Actinobacteria	Actinobacteria	Streptomycetales	Streptomycetaceae	Streptomyces	Streptomyces sp. MnatMP-M17
2667527448	Streptomyces paucisporeus CGMCC 4.2025	2668221165	NA	2668221166	2668221167	2668221169	2668221170	Actinobacteria	Actinobacteria	Streptomycetales	Streptomycetaceae	Streptomyces	Streptomyces paucisporeus
2671180173	Streptomyces sp TLI 053	2671777754	2671777760	2671777756	2671777757	2671777758	2671777759	Actinobacteria	Actinobacteria	Streptomycetales	Streptomycetaceae	Streptomyces	Streptomyces sp. TLI 053
2675903055	Streptomyces qinglanensis CGMCC 4.6825	NA	2676455710	2676455709	2676455708	2676455707	2676455706	Actinobacteria	Actinobacteria	Streptomycetales	Streptomycetaceae	Streptomyces	Streptomyces qinglanensis
2684622614	Streptomyces kanasensis ZX01	2685076219	2685075901	2685075903	2685075904	2685075905	2685075906	Actinobacteria	Actinobacteria	Streptomycetales	Streptomycetaceae	Streptomyces	Streptomyces kanasensis
2690315863	Streptomyces sp. WAC04657	2691349928	NA	2691349933	2691349932	2691349923	2691349930	Actinobacteria	Actinobacteria	Streptomycetales	Streptomycetaceae	Streptomyces	Streptomyces sp. WAC04657
2706794562	Streptomyces sp. TP-A0875	NA	2707422122	2707422134	2707422133	2707422131	2707422130	Actinobacteria	Actinobacteria	Streptomycetales	Streptomycetaceae	Streptomyces	Streptomyces sp. TP-A0875
2728369488	Streptomyces sp. TLI 146	NA	2730559303	2730559294	2730559293	2730559302	2730556457	Actinobacteria	Actinobacteria	Streptomycetales	Streptomycetaceae	Streptomyces	Streptomyces sp. TLI 146
2744054956	Streptomyces sp. SBT349	2746312283	NA	2746312288	2746312287	2746312284	2746312285	Actinobacteria	Actinobacteria	Streptomycetales	Streptomycetaceae	Streptomyces	Streptomyces sp. SBT349
2747842505	Streptomyces sp. CNZ306	2748036444	2748036446	2748036448	2748036449	2748036450	2748036451	Actinobacteria	Actinobacteria	Streptomycetales	Streptomycetaceae	Streptomyces	Streptomyces sp. CNZ306
2765236011	Streptomyces niger NRRL B-3857	2766438172	NA	2766438170	2766438169	2766438168	2766438167	Actinobacteria	Actinobacteria	Streptomycetales	Streptomycetaceae	Streptomyces	Streptomyces niger
2767802032	Streptomyces sp. NRRL S-646	NA	2768038988	2768038990	2768038991	2768038993	2768038994	Actinobacteria	Actinobacteria	Streptomycetales	Streptomycetaceae	Streptomyces	Streptomyces sp. NRRL S-646
2767802069	Streptomyces sp. NRRL F-5065	NA	2768319954	2768319966	2768319965	2768319963	2768319962	Actinobacteria	Actinobacteria	Streptomycetales	Streptomycetaceae	Streptomyces	Streptomyces sp. NRRL F-5065
2767802098	Streptomyces variegatus NRRL B-16380	2768541415	2768541417	2768541419	2768541420	2768541413	2768541414	Actinobacteria	Actinobacteria	Streptomycetales	Streptomycetaceae	Streptomyces	Streptomyces variegatus
2767802108	Streptomyces violaceorubidus NRRL B-16381	2768611190	NA	2768611195	2768611194	2768611185	2768611192	Actinobacteria	Actinobacteria	Streptomycetales	Streptomycetaceae	Streptomyces	Streptomyces violaceorubidus
2773857658	Streptomyces sp. 75	2774062567	NA	2774062569	2774062570	2774062572	2774062573	Actinobacteria	Actinobacteria	Streptomycetales	Streptomycetaceae	Streptomyces	Streptomyces sp. 75
2775507080	Streptomyces flavovariabilis NRRL B-16367	2777069159	NA	2777069161	2777069162	2777069155	2777069156	Actinobacteria	Actinobacteria	Streptomycetales	Streptomycetaceae	Streptomyces	Streptomyces flavovariabilis
2775507081	Streptomyces seoulensis NRRL B-24310	2799410535	NA	2799410537	2799410538	2799410540	2799410541	Actinobacteria	Actinobacteria	Streptomycetales	Streptomycetaceae	Streptomyces	Streptomyces seoulensis
2785510707	Streptomyces sp. PanSC19	2785549902	NA	2785549904	2785549905	2785549906	2785549907	Actinobacteria	Actinobacteria	Streptomycetales	Streptomycetaceae	Streptomyces	Streptomyces sp. PanSC19
2791355402	Streptomyces sp. WAC00288	2793943835	NA	2793943840	2793943839	2793943830	2793943837	Actinobacteria	Actinobacteria	Streptomycetales	Streptomycetaceae	Streptomyces	Streptomyces sp. WAC00288
2799112265	Streptomyces sp. BK022	2799410535	NA	2799410537	2799410538	2799410540	2799410541	Actinobacteria	Actinobacteria	Streptomycetales	Streptomycetaceae	Streptomyces	Streptomyces sp. BK022					129	6897667
2820999004	Streptomyces cinereoruber DSM 41512	2821000985	NA	2821000990	2821000989	2821000980	2821000987	Actinobacteria	Actinobacteria	Streptomycetales	Streptomycetaceae	Streptomyces	Streptomyces cinereoruber
2772190748	Streptosporangium amethystogenes NRRL B-2639	2772810610	NA	2772810612	2772810613	2772810614	2772810615	Actinobacteria	Actinobacteria	Streptosporangiales	Streptosporangiaceae	Streptosporangium	Streptosporangium amethystogenes
2806310643	Thermobifida halotolerans DSM 44931	2807055903	NA	2807055901	2807055900	2807055898	2807055897	Actinobacteria	Actinobacteria	Streptosporangiales	Nocardiopsaceae	Thermobifida	Thermobifida halotolerans
2634166429	Actinobacteria bacterium OV320	2635635611	2635635605	2635635609	2635635608	2635635607	2635635606	Actinobacteria	Actinobacteria	unclassified	unclassified	unclassified	Actinobacteria bacterium OV320
2781125706	Vibrio crassostreae 25 P 9	2781483387	NA	2781483388	2781483389	2781483390	2781483391	Proteobacteria	Gammaproteobacteria	Vibrionales	Vibrionaceae	Vibrio	Vibrio crassostreae
2597490185	Xenorhabdus szentirmaii DSM 16338	NA	2598651467	2598652163	2598652164	2598652165	2598652166	Proteobacteria	Gammaproteobacteria	Enterobacterales	Morganellaceae	Xenorhabdus	Xenorhabdus szentirmaii
2627853957	Xenorhabdus nematophila C2-3	NA	2629651726	2629651727	2629651729	2629651730	2629651732	Proteobacteria	Gammaproteobacteria	Enterobacterales	Morganellaceae	Xenorhabdus	Xenorhabdus nematophila
2636416088	Xenorhabdus cabanillasii JM26	2639230203	NA	2639230204	2639230205	2639230206	2639230207	Proteobacteria	Gammaproteobacteria	Enterobacterales	Morganellaceae	Xenorhabdus	Xenorhabdus cabanillasii
2684622846	Xenorhabdus japonica DSM 16522	2685862205	NA	2685862206	2685862207	2685862209	2685862210	Proteobacteria	Gammaproteobacteria	Enterobacterales	Morganellaceae	Xenorhabdus	Xenorhabdus japonica
