# Supplementary material for: Global landscape of phenazine biosynthesis and biodegradation reveals species-specific colonization patterns in agricultural soils and crop microbiomes
Source: eLife journal article supplement (doi:10.7554/elife.59726), 2020-09-15
Supplement: supp [file elife-59726-supp-v1.zip › elife_poa_e59726_Supplementary_file_2.xlsx]

## Sheet: total-bacteria reference genes
Marker Id	Gene name	Gene description
TIGR_TIGR00496	frr	ribosome recycling factor
TIGR_TIGR01953	NusA	transcription termination factor NusA
TIGR_TIGR00487	IF-2	translation initiation factor IF-2
TIGR_TIGR00116	tsf	translation elongation factor Ts
TIGR_TIGR00088	trmD	tRNA (guanine(37)-N(1))-methyltransferase
TIGR_TIGR01011	rpsB_bact	ribosomal protein uS2
TIGR_TIGR01021	rpsE_bact	ribosomal protein uS5
TIGR_TIGR02027	rpoA	DNA-directed RNA polymerase, alpha subunit
TIGR_TIGR03654	L6_bact	ribosomal protein uL6
TIGR_TIGR00006	TIGR00006	16S rRNA (cytosine(1402)-N(4))-methyltransferase
TIGR_TIGR00615	recR	recombination protein RecR
TIGR_TIGR01009	rpsC_bact	ribosomal protein uS3
TIGR_TIGR00468	pheS	phenylalanine--tRNA ligase, alpha subunit
TIGR_TIGR00967	3a0501s007	preprotein translocase, SecY subunit
TIGR_TIGR03953	rplD_bact	50S ribosomal protein uL4
TIGR_TIGR00168	infC	translation initiation factor IF-3
TIGR_TIGR03625	L3_bact	50S ribosomal protein uL3
TIGR_TIGR00635	ruvB	Holliday junction DNA helicase RuvB
TIGR_TIGR01171	rplB_bact	ribosomal protein uL2
TIGR_TIGR00019	prfA	peptide chain release factor 1
TIGR_TIGR00092	TIGR00092	GTP-binding protein YchF
TIGR_TIGR01017	rpsD_bact	ribosomal protein uS4
TIGR_TIGR00396	leuS_bact	leucine--tRNA ligase
TIGR_TIGR00344	alaS	alanine--tRNA ligase
TIGR_TIGR01393	lepA	elongation factor 4
