# Supplementary material for: Global landscape of phenazine biosynthesis and biodegradation reveals species-specific colonization patterns in agricultural soils and crop microbiomes
Source: eLife journal article supplement (doi:10.7554/elife.59726), 2020-09-15
Supplement: supp [file elife-59726-supp-v1.zip › elife_poa_e59726_Supplementary_file_3.xlsx]

## Sheet: Simulation member species
Assembly accession	Genus	Species	Strain
ASM118278v1	Bacillus	thuringiensis	HS18-1
ASM198931v1	Bordetella	pertussis	J277
ASM95912v1	Burkholderia	pseudomallei	1026b
ASM141180v1	Burkholderia	plantarii	ATCC 43733
ASM259127v1	Chryseobacterium	indologenes	FDAARGOS_379
ASM288063v1	Enterococcus	faecium	AALTL
ASM104094v1	Herbaspirillum	seropedicae	Z67
ASM221388v1	Listeria	monocytogenes	02-1103
ASM130754v1	Mycobacterium	fortuitum	CT6
ASM188671v1	Nocardia	soli	Y48
ASM235603v1	Nocardia	seriolae	UTF1
ASM289388v1	Paenibacillus	polymyxa	HY96-2
ASM14893v1	Pantoea	vagans	C9-1
ASM170931v1	Pantoea	agglomerans	C410P1
ASM329036v1	Pseudomonas	putida	NX-1
ASM26754v1	Pseudomonas	stutzeri	CCUG 29243
ASM160596v1	Pseudomonas	koreensis	D26
ASM51760v1	Rhizobium	leguminosarum	WSM1689
ASM1482v1	Rhodopseudomonas	palustris	BisA53
ASM307351v1	Salmonella	enterica	CFSAN051295
ASM96732v1	Staphylococcus	aureus	ST228
ASM16467v2	Streptococcus	parasanguinis	ATCC 15912
ASM69523v1	Streptomyces	albulus	NK660
ASM173580v1	Streptomyces	puniciscabiei	TW1S1
ASM320803v1	Streptomyces	actuosus	ATCC 25421
ASM211952v1	Vibrio	alginolyticus	K08M4
ASM96127v1	Xanthomonas	citri	mf20
ASM102191v1	Xanthomonas	oryzae	YM15
