# Supplementary material for: Global landscape of phenazine biosynthesis and biodegradation reveals species-specific colonization patterns in agricultural soils and crop microbiomes
Source: eLife journal article supplement (doi:10.7554/elife.59726), 2020-09-15
Supplement: supp [file elife-59726-supp-v1.zip › elife_poa_e59726_Supplementary_file_4.xlsx]

## Sheet: phz+ and phd+ abundance
Sample information and annotation				Results		Relative abundance (%) of taxonomic groups out of phz+ bacteria (Order level)
Sample SRA accession	Category	Sub-category	Organism	phz+ (%)	phdA+ (%)	Streptomycetales	Micrococcales	Actinopolysporales	Streptosporangiales	Micromonosporales	Corynebacteriales	Pseudonocardiales	unclassified	Burkholderiales	Myxococcales	Enterobacterales	Vibrionales	Aeromonadales	Cellvibrionales	Xanthomonadales	Pseudomonadales
ERR1654119	Rhizosphere	Rhizosphere	Lettuce	0	0	0	0	0	0	0	0	0	0	0	0	0	0	0	0	0	0
ERR1654120	Rhizosphere	Rhizosphere	Lettuce	0	0	0	0	0	0	0	0	0	0	0	0	0	0	0	0	0	0
ERR1654121	Rhizosphere	Rhizosphere	Lettuce	0	0	0	0	0	0	0	0	0	0	0	0	0	0	0	0	0	0
ERR1654122	Rhizosphere	Rhizosphere	Lettuce	0.05	0	36.9659	0	0	0	0	0	15.9441	0	47.0901	0	0	0	0	0	0	0
ERR1654123	Rhizosphere	Rhizosphere	Lettuce	0.04	0	43.9143	0	0	0	30.6005	0	0	0	25.4853	0	0	0	0	0	0	0
ERR1654124	Rhizosphere	Rhizosphere	Lettuce	0	0	0	0	0	0	0	0	0	0	0	0	0	0	0	0	0	0
ERR1654125	Rhizosphere	Rhizosphere	Lettuce	0	0	0	0	0	0	0	0	0	0	0	0	0	0	0	0	0	0
ERR1654126	Rhizosphere	Rhizosphere	Lettuce	0.09	0	81.3304	0	0	0	0	0	0	0	18.6696	0	0	0	0	0	0	0
ERR1700674	Soil	Forest	NA	0.04	0.027098	24.4425	0	0	3.80283	0	0	32.6444	0	26.0526	0	0	0	0	0	13.0577	0
ERR1700675	Soil	Forest	NA	0	0.0736588	0	0	0	0	0	0	0	0	0	0	0	0	0	0	0	0
ERR1700676	Soil	Forest	NA	0	0	0	0	0	0	0	0	0	0	0	0	0	0	0	0	0	0
ERR1700677	Soil	Forest	NA	0.04	0.0173171	48.0697	0	0	4.36804	1.94096	0	21.8402	0	21.8402	0	0	0	0	0	0	1.94096
ERR1700678	Soil	Forest	NA	0.07	0.023212	44.5453	0	0	2.368	5.43921	0	10.8784	0	16.3176	0	7.20502	0	0	0	0	13.2464
ERR1700679	Soil	Forest	NA	0.04	0.0348606	42.328	0	7.91381	11.3306	4.63523	5.98095	9.27047	0	13.9057	0	0	0	0	0	0	4.63523
ERR1700680	Soil	Forest	NA	0	0.0669125	0	0	0	0	0	0	0	0	0	0	0	0	0	0	0	0
ERR1700681	Soil	Forest	NA	0	0	0	0	0	0	0	0	0	0	0	0	0	0	0	0	0	0
ERR1700682	Soil	Forest	NA	0	0	0	0	0	0	0	0	0	0	0	0	0	0	0	0	0	0
ERR1700683	Soil	Forest	NA	0.19	0.22915	49.0035	0	0	12.2493	1.44072	0	12.021	0	7.2036	0	0	0	0	0	10.2476	7.83426
ERR1700684	Soil	Forest	NA	0.06	0.0652431	48.1951	0	5.62206	9.90257	5.22383	0	17.9969	0	10.4477	0	0	0	0	0	0	2.61191
ERR1700685	Soil	Forest	NA	0.04	0.0519751	26.2092	0	0	12.8878	4.29592	4.29592	14.8267	0	12.8878	0	4.29592	0	0	0	11.709	8.59183
ERR1700686	Soil	Forest	NA	0.01	0	23.7954	0	7.27089	7.27089	0	0	21.8127	0	25.3083	0	0	0	0	0	0	14.5418
ERR1700687	Soil	Forest	NA	0.05	0.0381585	25.8512	0	2.91976	7.04915	3.52457	0	24.672	0	35.9833	0	0	0	0	0	0	0
ERR1700688	Soil	Forest	NA	0.04	0.0317367	35.1228	0	0	0	0	26.9325	15.9202	0	11.0122	0	0	0	0	0	0	11.0122
ERR1700689	Soil	Forest	NA	0.12	0.0653955	30.8799	0	0	10.9232	6.84575	2.17778	19.3219	0	21.7778	0	0	0	0	0	3.71816	4.35556
ERR1700690	Soil	Forest	NA	0	0	0	0	0	0	0	0	0	0	0	0	0	0	0	0	0	0
ERR1700691	Soil	Forest	NA	0	0	0	0	0	0	0	0	0	0	0	0	0	0	0	0	0	0
ERR1700692	Soil	Forest	NA	0.03	0.0544189	31.9901	0	0	26.4331	6.60828	0	22.8176	0	12.151	0	0	0	0	0	0	0
ERR1700693	Soil	Forest	NA	0	0.078598	0	0	0	0	0	0	0	0	0	0	0	0	0	0	0	0
ERR1700694	Soil	Forest	NA	0	0	0	0	0	0	0	0	0	0	0	0	0	0	0	0	0	0
ERR1700695	Soil	Forest	NA	0.13	0.039424	57.9778	0	0	16.6773	0	0	6.50067	0	14.0074	0	0	0	0	0	0	4.8368
ERR1700696	Soil	Forest	NA	0.13	0	59.7481	0	0	11.6733	0	0	17.1084	0	0	6.49481	4.97549	0	0	0	0	0
ERR1700697	Soil	Forest	NA	0	0	0	0	0	0	0	0	0	0	0	0	0	0	0	0	0	0
ERR1700698	Soil	Forest	NA	0	0	0	0	0	0	0	0	0	0	0	0	0	0	0	0	0	0
ERR1700699	Soil	Forest	NA	0.15	0	48.7131	0	3.90258	20.8426	0	4.42362	17.6945	0	4.42362	0	0	0	0	0	0	0
ERR1700700	Soil	Forest	NA	0.29	0.191257	60.4912	0	1.35731	21.8816	1.35731	9.48341	0	2.71461	1.35731	0	0	0	0	0	0	1.35731
ERR1700701	Soil	Forest	NA	0.25	0.0471553	70.601	0	0	5.22631	0	3.62898	8.42095	0	8.49373	0	0	0	0	0	0	3.62898
ERR1700702	Soil	Forest	NA	0	0	0	0	0	0	0	0	0	0	0	0	0	0	0	0	0	0
ERR1700703	Soil	Forest	NA	0.14	0	63.4385	0	0	0	0	17.2465	0	0	8.11878	5.59808	0	0	0	0	0	5.59808
ERR1700704	Soil	Forest	NA	0.11	0.0313632	56.4829	0	0	6.50144	2.01664	2.90169	16.5847	0	11.4793	0	0	0	0	0	0	4.03328
ERR1700705	Soil	Forest	NA	0.07	0	34.8888	0	0	30.6676	0	2.68757	8.82109	0	12.2671	0	0	0	0	0	0	10.6678
ERR1700706	Soil	Forest	NA	0	0	0	0	0	0	0	0	0	0	0	0	0	0	0	0	0	0
ERR1700707	Soil	Forest	NA	0.11	0.0229596	52.2086	0	0	15.3859	0	5.27437	12.31	0	3.70529	0	3.70529	0	0	0	0	7.41058
ERR1700708	Soil	Forest	NA	0.22	0.0948138	34.1578	0	3.23331	17.2702	1.3857	9.97507	30.7446	0	3.23331	0	0	0	0	0	0	0
ERR1700709	Soil	Forest	NA	0	0	0	0	0	0	0	0	0	0	0	0	0	0	0	0	0	0
ERR1700710	Soil	Forest	NA	0.17	0.0171058	49.9467	1.12189	0	1.12189	0	12.354	14.724	0	14.521	2.54428	0	0	0	0	0	3.66617
ERR1700711	Soil	Forest	NA	0.17	0.0415815	60.0621	0	0	19.241	2.6232	0	10.2041	0	0	2.6232	0	0	0	0	0	5.2464
ERR1700712	Soil	Forest	NA	0.16	0.0175633	56.0185	0	0	5.48334	1.78209	9.56397	17.2088	0	5.86271	0	0	0	0	0	0	4.08063
ERR1700713	Soil	Forest	NA	0	0	0	0	0	0	0	0	0	0	0	0	0	0	0	0	0	0
ERR1700714	Soil	Forest	NA	0	0	0	0	0	0	0	0	0	0	0	0	0	0	0	0	0	0
ERR1700715	Soil	Forest	NA	0.23	0.0642762	32.3704	0	1.37854	13.0921	0	1.37854	40.0668	0	5.52743	0	0	0	0	0	0	6.18616
ERR1700716	Soil	Forest	NA	0.23	0.0920735	55.0342	0	0	11.7372	8.28635	4.09137	9.4588	0	9.11368	0	2.27842	0	0	0	0	0
ERR1700717	Soil	Forest	NA	0	0	0	0	0	0	0	0	0	0	0	0	0	0	0	0	0	0
ERR1700718	Soil	Forest	NA	0.09	0.0788393	74.4535	0	0	0	0	0	12.7733	0	0	0	0	0	0	0	12.7733	0
ERR1700719	Soil	Forest	NA	0.05	0.0241414	25.7224	0	8.59976	6.43059	12.8612	0	25.7224	0	12.1455	0	0	0	0	8.51824	0	0
ERR1700720	Soil	Forest	NA	0.04	0.0702938	14.9838	0	0	3.08378	0	10.0361	55.6186	0	0	0	0	0	0	0	0	16.2778
ERR1700721	Soil	Forest	NA	0	0.0377575	0	0	0	0	0	0	0	0	0	0	0	0	0	0	0	0
ERR1700722	Soil	Forest	NA	0	0.0464546	0	0	0	0	0	0	0	0	0	0	0	0	0	0	0	0
ERR1700724	Soil	Forest	NA	0	0.0355168	0	0	0	0	0	0	0	0	0	0	0	0	0	0	0	0
ERR1700725	Soil	Forest	NA	0	0	0	0	0	0	0	0	0	0	0	0	0	0	0	0	0	0
ERR1700726	Soil	Forest	NA	0.03	0.0607177	38.4518	0	0	28.6212	19.7562	0	13.1708	0	0	0	0	0	0	0	0	0
ERR1700727	Soil	Forest	NA	0.03	0	27.5965	0	0	4.8269	0	4.8269	14.4807	0	33.7883	0	0	0	0	0	4.8269	9.6538
ERR1700728	Soil	Forest	NA	0	0	0	0	0	0	0	0	0	0	0	0	0	0	0	0	0	0
ERR1700729	Soil	Forest	NA	0	0.0560462	0	0	0	0	0	0	0	0	0	0	0	0	0	0	0	0
ERR1700730	Soil	Forest	NA	0.03	0.0301896	37.5961	0	3.13317	18.4548	1.7491	2.52771	19.2401	0	12.0518	1.7491	0	0	0	0	1.7491	1.7491
ERR1700731	Soil	Forest	NA	0.06	0	51.7012	0	0	11.4255	9.34815	0	4.67408	0	18.177	0	0	0	0	0	0	4.67408
ERR1700732	Soil	Forest	NA	0.1	0.0496182	55.4058	0	0	26.6281	1.86082	4.12788	5.9887	0	5.9887	0	0	0	0	0	0	0
ERR1700733	Soil	Forest	NA	0.03	0.0394176	37.5903	0	0	12.2828	3.95091	1.79184	9.21879	0.582348	21.6539	0	1.76636	0	0	1.76636	5.4455	3.95091
ERR1700734	Soil	Forest	NA	0	0	0	0	0	0	0	0	0	0	0	0	0	0	0	0	0	0
ERR1700735	Soil	Forest	NA	0	0	0	0	0	0	0	0	0	0	0	0	0	0	0	0	0	0
ERR1700736	Soil	Forest	NA	0.04	0.0407709	32.9267	0	1.65754	19.4898	7.55958	10.2503	18.899	0	9.21712	0	0	0	0	0	0	0
ERR1700737	Soil	Forest	NA	0	0	0	0	0	0	0	0	0	0	0	0	0	0	0	0	0	0
ERR1700738	Soil	Forest	NA	0.05	0.0458254	44.7146	0	9.62808	17.7547	0	0	5.9469	0	11.8938	0	0	0	0	0	0	10.062
ERR1700739	Soil	Forest	NA	0.05	0.0899537	43.4902	0	0	7.34093	3.00506	3.00506	18.0304	0	16.1133	0	0	0	0	0	0	9.01518
ERR1700740	Soil	Forest	NA	0.18	0.0774445	42.5959	0	0	6.98621	11.1039	0	23.5191	0	6.1704	0	0	0	0	0	2.96222	6.66233
ERR1700741	Soil	Forest	NA	0.24	0.129727	34.5571	0	0.878142	10.9486	7.72608	3.55047	10.3605	1.98993	13.0707	0	1.98993	0	0	0	6.28636	8.64213
ERR1700742	Soil	Forest	NA	0.19	0.0162768	51.9494	0	0	11.7721	2.40793	5.18129	21.4655	0	2.40793	2.40793	0	0	0	0	0	2.40793
ERR1700743	Soil	Forest	NA	0.07	0.0159714	27.0109	0	0	19.8817	8.35482	16.516	4.17741	1.90737	13.7969	0	4.17741	0	0	0	0	4.17741
ERR1700745	Soil	Forest	NA	0.05	0.0876352	46.9666	0	0	21.1037	6.55939	0.970221	9.71607	0	2.78149	0.970221	0	0	0	0	2.18646	8.74585
ERR1700746	Soil	Forest	NA	0.05	0.124947	28.8276	0	2.19816	18.5679	6.59448	3.96127	10.9908	0	15.6709	2.19816	0	0	0	0	0	10.9908
ERR1700747	Soil	Forest	NA	0.22	0.0181907	42.8071	0	0	15.6421	2.09943	3.85723	5.14494	0	16.9066	0.94608	2.09943	0	0	0	0	10.4971
ERR1700748	Soil	Forest	NA	0.12	0.0293949	48.409	0	0	8.61216	5.97559	6.47819	4.30608	1.31828	14.939	3.98609	0	0	0	0	0	5.97559
ERR1700749	Soil	Forest	NA	0.12	0.0388989	53.4351	0	0	22.6339	6.83744	0	3.41872	0	10.2562	0	0	0	0	0	3.41872	0
ERR1700750	Soil	Forest	NA	0.11	0.081747	50.3764	0	0	8.87711	0	5.7968	10.3072	0	21.5622	0	0	0	0	0	0	3.08031
ERR1700751	Soil	Forest	NA	0.14	0.0755391	41.0307	0	0	9.95728	0	5.94655	11.2263	0	18.2475	0	0	0	0	0	3.83339	9.75828
ERR1700752	Soil	Forest	NA	0	0	0	0	0	0	0	0	0	0	0	0	0	0	0	0	0	0
ERR1700753	Soil	Forest	NA	0.12	0.0433334	39.1652	0	3.23243	2.88119	12.9297	11.831	10.8628	0	13.59	0	0	0	0	0	4.67303	0.834652
ERR1700754	Soil	Forest	NA	0	0	0	0	0	0	0	0	0	0	0	0	0	0	0	0	0	0
ERR1700755	Soil	Forest	NA	0.24	0.0446867	44.6074	0	0	16.2874	7.41154	0.792537	8.68576	0	6.91059	1.77517	0	0	0	0	5.32551	8.20408
ERR1700756	Soil	Forest	NA	0.12	0.0132558	39.0482	0	0	13.5637	5.9019	0.879942	21.2223	0	14.5694	1.9673	0	0	0	0	0	2.84724
ERR1700757	Soil	Forest	NA	0.08	0.0416944	33.5285	0	0	23.0538	1.53735	10.5846	4.95973	0	21.3763	0	0	0	0	0	0	4.95973
ERR1700758	Soil	Forest	NA	0.09	0.0383142	15.1022	0	0	18.3828	0	6.1276	18.3828	0	27.7165	0	0	0	0	8.16045	0	6.1276
ERR1700759	Soil	Forest	NA	0.14	0.0124244	52.0929	0	0	7.89334	2.79728	2.60928	20.9903	1.94527	7.78108	0	0	0	0	0	0	3.89054
ERR1700761	Soil	Forest	NA	0.13	0.0146822	45.9733	0	0	11.7891	10.5234	10.244	6.79085	0	10.5234	0	0	0	0	0	0	4.1559
ERR1742252	Soil	Forest	NA	0	0	0	0	0	0	0	0	0	0	0	0	0	0	0	0	0	0
ERR1742253	Soil	Forest	NA	0	0	0	0	0	0	0	0	0	0	0	0	0	0	0	0	0	0
ERR1742254	Soil	Forest	NA	0	0.396825	0	0	0	0	0	0	0	0	0	0	0	0	0	0	0	0
ERR1742255	Soil	Forest	NA	0	0	0	0	0	0	0	0	0	0	0	0	0	0	0	0	0	0
ERR1742256	Soil	Forest	NA	0	0	0	0	0	0	0	0	0	0	0	0	0	0	0	0	0	0
ERR1742257	Soil	Forest	NA	0	0	0	0	0	0	0	0	0	0	0	0	0	0	0	0	0	0
ERR1742258	Soil	Forest	NA	0	0	0	0	0	0	0	0	0	0	0	0	0	0	0	0	0	0
ERR1742259	Soil	Forest	NA	0	0.442012	0	0	0	0	0	0	0	0	0	0	0	0	0	0	0	0
ERR1742260	Soil	Forest	NA	0	0	0	0	0	0	0	0	0	0	0	0	0	0	0	0	0	0
ERR1742261	Soil	Forest	NA	0	0	0	0	0	0	0	0	0	0	0	0	0	0	0	0	0	0
ERR1742262	Soil	Forest	NA	0.05	0.108524	18.7452	0	0	7.30747	5.35228	2.18909	31.6214	0	8.51546	13.1346	0	0	0	0	6.56728	6.56728
ERR1742263	Soil	Forest	NA	0.06	0.149013	30.262	0	0	20.5495	1.07348	5.94249	18.115	0	14.607	2.4345	0	0	0	0	2.14696	4.86901
ERR1742265	Soil	Forest	NA	0	0.101897	0	0	0	0	0	0	0	0	0	0	0	0	0	0	0	0
ERR1742266	Soil	Forest	NA	0.06	0.117005	36.3184	0	0	10.329	0	1.18082	31.8694	0	5.31157	0	7.02336	0	0	0	0	7.96736
ERR1742267	Soil	Forest	NA	0.06	0.180041	46.4333	0	4.92255	4.92255	7.09313	0	19.6902	0	4.92255	4.92255	0	0	0	0	0	7.09313
ERR1742268	Soil	Forest	NA	0.12	0.214353	47.2311	0	1.77145	7.37798	1.65532	2.45933	19.5285	0	6.6901	2.45933	0	0	0	0	0	10.8269
ERR1742269	Soil	Forest	NA	0.04	0.0730386	25.2481	0	0	15.5503	11.2732	0	13.5279	0	22.116	0	0	0	0	0	4.5093	7.77515
ERR1742270	Soil	Forest	NA	0.06	0.0749626	36.8049	0	2.76025	13.4599	6.213	1.38013	14.8761	3.1065	20.0191	0	0	0	0	0	1.38013	0
ERR1742271	Soil	Forest	NA	0.04	0.247628	44.3109	0	0	6.41161	3.41272	6.82544	30.7145	0	6.82544	0	0	0	0	0	0	1.49945
ERR1742272	Soil	Forest	NA	0.11	0.291186	41.6473	0	2.26741	5.53348	4.53482	5.20355	13.6045	0	15.8719	4.53482	0	0	0	0	2.26741	4.53482
ERR1742273	Soil	Forest	NA	0	0	0	0	0	0	0	0	0	0	0	0	0	0	0	0	0	0
ERR1742274	Soil	Forest	NA	0	0.166531	0	0	0	0	0	0	0	0	0	0	0	0	0	0	0	0
ERR1742275	Soil	Forest	NA	0	0.230439	0	0	0	0	0	0	0	0	0	0	0	0	0	0	0	0
ERR1742276	Soil	Forest	NA	0.03	0.0993943	37.0193	0	0	14.4465	5.19473	0	28.893	0	7.22325	0	0	0	0	0	0	7.22325
ERR1742277	Soil	Forest	NA	0.05	0.238971	40.4013	0	2.02048	9.59452	0	6.69077	22.2253	0	4.04096	8.08192	0	0	0	0	2.02048	4.92423
ERR436051	Soil	Agricultural soil	NA	0.18	0.154645	48.644	0	0	5.66856	11.1777	8.47598	23.1995	0	2.83428	0	0	0	0	0	0	0
ERR436052	Soil	Agricultural soil	NA	0.09	0.138251	17.6337	0	0	0	14.9963	0	14.9963	0	14.9963	0	0	0	0	0	16.4677	20.9097
ERR436053	Soil	Agricultural soil	NA	0.22	0.183935	40.7959	0	0	2.65691	14.8559	0	2.65691	0	18.4081	0	0	0	0	0	17.9693	2.65691
ERR436054	Soil	Agricultural soil	NA	0.32	0.1489	40.2507	0	0	2.88271	4.12278	7.21487	17.8567	0	23.7363	0	0	0	0	0	1.82944	2.10653
ERR436055	Soil	Agricultural soil	NA	0.22	0.152949	28.8824	0	0	9.84465	15.5668	0	11.41	0	29.211	0	0	0	0	0	5.08511	0
ERR436056	Soil	Agricultural soil	NA	0.21	0.127708	18.2968	0	0	4.41985	9.45713	4.41985	0	0	8.21204	0	0	0	0	0	38.2695	16.9248
ERR436057	Soil	Agricultural soil	NA	0.17	0.246453	28.3805	0	0	4.83871	5.45329	0	29.6668	0	9.96275	0	4.80061	0	0	0	7.21997	9.67743
ERR436058	Soil	Agricultural soil	NA	0.32	0.194632	38.3821	0	0	9.09765	7.62617	0	9.97494	0	21.4865	0	0	0	0	0	4.69755	8.73504
ERR646488	Rhizosphere	Rhizosphere	Barley	0.39	0.0490942	47.6753	0	0.923389	7.93122	9.00795	0.923389	0.923389	0	13.2205	15.0072	0	0	0	0	1.50133	2.88641
ERR647605	Rhizosphere	Rhizosphere	Barley	0.41	0	25.9679	0	0	12.9261	9.5437	3.46163	4.52092	7.5736	4.80466	21.6118	0	0	0	0	4.2932	5.29648
ERR647606	Rhizosphere	Rhizosphere	Barley	0.56	0	32.3239	0	2.08247	7.29853	5.47668	0	9.96719	4.08139	3.39421	30.1694	0	0	0	0	1.04124	4.16495
ERR647607	Rhizosphere	Rhizosphere	Barley	0.32	0.0462963	46.8271	0	0	13.8452	1.95357	7.57459	7.88943	0	1.95357	7.75009	5.93586	0	0	0	4.31699	1.95357
ERR647608	Rhizosphere	Rhizosphere	Barley	0.22	0.0487222	51.9757	0	3.43678	10.1741	17.3656	13.6109	0	0	3.43678	0	0	0	0	0	0	0
ERR647609	Rhizosphere	Rhizosphere	Barley	0.2	0.0409928	45.7724	0	0	13.0084	0	6.41572	21.9721	3.20786	0	3.20786	0	0	0	0	0	6.41572
SRR1029957	Soil	Wetland	NA	0.7	0.0513896	1.86011	0	0	0	0	0	1.36611	0	4.70352	0	1.4726	0	1.47731	0	0	89.1204
SRR1152189	Soil	Agricultural soil	NA	0.16	0.297818	38.7489	2.09697	0.524243	1.22141	5.30912	0	16.9846	0	23.6422	3.14546	0	0	0	0	6.97336	1.35384
SRR1153387	Soil	Agricultural soil	NA	0.09	0.150782	26.6611	0	1.87745	11.1332	4.69362	1.7117	25.893	0	14.1656	4.78768	0	0	0	0	0.888489	8.18806
SRR11844047	Soil	Agricultural soil	NA	0.19	0	43.054	0	0	10.025	3.15059	0	17.1593	2.2527	8.92447	0	0	0	0	0	1.47115	13.9628
SRR11844048	Soil	Agricultural soil	NA	0.26	0	45.2388	0	0.851326	8.13237	5.8136	6.81516	7.51626	0	14.2405	1.93787	0	0	0	0	0.851326	8.6028
SRR11844049	Soil	Agricultural soil	NA	0.52	0.0225613	57.0103	0	0	9.91599	10.4627	2.0168	3.41491	2.50748	6.82982	1.39811	0	0	0	0	0	6.44384
SRR11844050	Rhizosphere	Rhizosphere	Wheat	1.73	0	58.2621	0	0.758235	5.9402	4.45471	1.16834	3.58525	5.27837	2.60838	0	0	0	0	0	0.379117	17.5653
SRR11844051	Rhizosphere	Rhizosphere	Wheat	0.68	0.0327806	35.8836	0	0.659546	2.63818	8.20059	0	6.57531	0	0	0	0	0	0	0	1.97864	44.0641
SRR11844052	Rhizosphere	Rhizosphere	Wheat	1.11	0.0568002	24.9823	0	0	1.68048	8.54897	0.84024	1.38082	0	1.92141	0	0	0	0	0	1.26036	59.3854
SRR11844053	Rhizosphere	Rhizosphere	Wheat	0.84	0.125681	23.0907	0	1.42158	6.3535	0.463462	1.52328	2.5831	0	5.0645	0	0	0	0	0	1.52328	57.9766
SRR11844054	Rhizosphere	Rhizosphere	Wheat	1.19	0.036271	72.6028	0	0.532295	2.66147	1.21722	1.21722	2.84993	0.532295	2.43444	1.21722	2.16308	0	0	0	0.532295	12.0398
SRR1510967	Rhizosphere	Rhizosphere	Switchgrass	0.86	0.561122	48.3299	0	0	0	0	0	6.72073	0	14.9831	0	0	0	0	0	0	29.9662
SRR1510968	Rhizosphere	Rhizosphere	Switchgrass	0.1	0.134652	12.4631	0	0	37.6843	0	0	12.4631	0	12.4631	12.4631	12.4631	0	0	0	0	0
SRR1510969	Rhizosphere	Rhizosphere	Switchgrass	0.2	0.129516	33.1461	0	5.22373	12.0093	0	1.6073	20.9986	0	14.5584	3.61643	0	0	0	0	0	8.84015
SRR1510970	Rhizosphere	Rhizosphere	Switchgrass	0.16	0.488866	38.4899	0	0	8.75649	0	0	17.513	0	22.0596	0	0	0	0	0	0	13.181
SRR1510971	Rhizosphere	Rhizosphere	Switchgrass	0.31	0.34125	37.0458	0	1.15246	15.6006	3.52941	2.63124	15.7875	0	9.94436	6.41495	2.63124	0	0	0	2.63124	2.63124
SRR1510976	Rhizosphere	Rhizosphere	Switchgrass	0.35	0.572344	32.7269	0	1.25595	8.41394	8.41394	0	19.0682	0	24.5119	2.80465	0	0	0	0	0	2.80465
SRR1510977	Rhizosphere	Rhizosphere	Switchgrass	0.28	0.18104	39.1446	0	0	4.28149	4.28149	1.93604	10.499	0	31.2944	4.28149	0	0	0	0	0	4.28149
SRR1510978	Rhizosphere	Rhizosphere	Switchgrass	0.2	0.310945	52.1901	0	2.86901	12.6782	0	20.1856	0	0	12.0771	0	0	0	0	0	0	0
SRR1510979	Rhizosphere	Rhizosphere	Switchgrass	0.12	0.229827	20.8749	0	0	0	0	0	43.0394	0	36.0857	0	0	0	0	0	0	0
SRR1510983	Rhizosphere	Rhizosphere	Switchgrass	0.11	0.147231	50.206	0	0	9.95879	9.95879	0	19.9176	0	9.95879	0	0	0	0	0	0	0
SRR1510984	Rhizosphere	Rhizosphere	Switchgrass	0.19	0.194735	54.0537	0	0	1.88617	1.88617	0	8.58206	0	12.1368	8.58206	0	0	0	0	0	12.8731
SRR1510985	Rhizosphere	Rhizosphere	Switchgrass	0.35	0.178698	41.6965	0	2.10588	19.8677	4.21175	0	12.9615	0	9.57834	0	0	0	0	0	4.78917	4.78917
SRR1510989	Rhizosphere	Rhizosphere	Switchgrass	0.29	0.120481	53.1533	0	0	4.25569	0	0	32.1942	0	6.14112	0	0	0	0	0	4.25569	0
SRR1510990	Rhizosphere	Rhizosphere	Switchgrass	0.19	0.123963	45.9989	0	0	12.2314	0	0	12.2314	0	11.191	12.2314	0	0	0	0	6.11572	0
SRR1510991	Rhizosphere	Rhizosphere	Switchgrass	0	0.296164	0	0	0	0	0	0	0	0	0	0	0	0	0	0	0	0
SRR1510992	Rhizosphere	Rhizosphere	Switchgrass	0.29	0.0536819	34.3928	0	0	4.34633	0	1.98069	13.039	0	35.5679	6.32702	0	0	0	0	4.34633	0
SRR1510993	Rhizosphere	Rhizosphere	Switchgrass	0.25	0.327134	38.3732	0	5.38237	14.8464	0	0	18.9602	0	17.0554	0	0	0	0	0	4.1138	1.26857
SRR1510995	Rhizosphere	Rhizosphere	Switchgrass	0.27	0.134989	40.92	0	1.6223	12.185	0	8.54349	8.90527	1.6223	10.1658	6.536	0	0	0	0	6.25531	3.2446
SRR1510996	Rhizosphere	Rhizosphere	Switchgrass	0.29	0.126008	36.1689	0	0	13.7192	0	3.27591	22.9313	0	14.077	3.27591	0	0	0	0	0	6.55181
SRR1510997	Rhizosphere	Rhizosphere	Switchgrass	0	1.13825	0	0	0	0	0	0	0	0	0	0	0	0	0	0	0	0
SRR1510998	Rhizosphere	Rhizosphere	Switchgrass	0.22	0.387554	3.89164	0	0	22.7222	0	0	19.0398	0	21.6093	17.589	0	0	0	0	0	15.1481
SRR1510999	Rhizosphere	Rhizosphere	Switchgrass	0	0	0	0	0	0	0	0	0	0	0	0	0	0	0	0	0	0
SRR1511000	Rhizosphere	Rhizosphere	Switchgrass	0.27	0.351386	60.8177	0	0	16.5138	13.4364	0	3.07737	0	0	0	0	0	0	0	6.15474	0
SRR1511001	Rhizosphere	Rhizosphere	Switchgrass	0.22	0.288714	37.0785	0	0	0	21.4869	0	0	0	20.4062	0	0	0	0	0	0	21.0283
SRR1511002	Rhizosphere	Rhizosphere	Switchgrass	0.41	0.139004	58.9377	0	3.91881	9.3881	1.9594	0	11.1326	0	4.59706	0	0	0	0	0	1.9594	8.10695
SRR1511006	Rhizosphere	Rhizosphere	Switchgrass	0.34	0.440227	40.2204	0	0	17.1623	5.03499	1.18371	8.00272	0	15.058	8.00272	0	0	0	0	2.66757	2.66757
SRR1511007	Rhizosphere	Rhizosphere	Switchgrass	0.36	0.160141	49.9062	0	0	1.33449	0	0	15.2342	1.33449	17.4882	3.04685	0	0	0	0	3.04685	8.6087
SRR1511008	Rhizosphere	Rhizosphere	Switchgrass	0.22	0.0953698	25.2062	0	1.62894	8.91027	18.2033	5.2696	3.64066	0	28.2307	3.64066	0	0	0	0	0	5.2696
SRR1511009	Rhizosphere	Rhizosphere	Switchgrass	0.29	0.190259	21.3212	0	0	23.2719	3.73616	0	34.4803	6.72712	0	0	0	0	0	0	3.73616	6.72712
SRR1511010	Rhizosphere	Rhizosphere	Switchgrass	0.21	0.315526	58.7435	0	4.17141	8.34282	0	4.17141	10.1997	0	12.5142	0	0	0	0	0	0	1.85691
SRR1511011	Rhizosphere	Rhizosphere	Switchgrass	0.25	0.126387	13.4124	0	7.57144	10.6721	0	1.37016	33.1901	0	26.749	5.66463	0	0	0	0	0	1.37016
SRR1924237	Rhizosphere	Rhizosphere	Sugarcane	0.78	0.00859365	61.1915	0	0.88698	1.93503	1.79009	0.543275	3.03347	12.0707	2.85084	0	0	0	0	0	13.9568	1.74131
SRR1926113	Rhizosphere	Rhizosphere	Sugarcane	0.52	0	27.3311	0	0	4.65725	0.422468	0.422468	2.48038	5.25778	3.82647	0	0	0	0	0	44.1539	11.4481
SRR1926121	Rhizosphere	Rhizosphere	Sugarcane	1.08	0	38.9061	0	0	2.57625	0	0	1.93825	11.632	12.0402	0.793916	0	0	0	0	25.9651	6.14817
SRR1926122	Rhizosphere	Rhizosphere	Sugarcane	0.92	0	53.3795	0	0.502275	2.47748	0.502275	1.9752	2.05015	23.4859	0	2.06384	0	0	0	0	11.5882	1.9752
SRR1926128	Soil	Agricultural soil	NA	0.16	0.0366044	47.951	0	0.32228	4.33286	3.15169	10.3634	6.3317	0.32228	5.87315	6.46366	0	0	0	0	7.87913	7.00881
SRR1926129	Soil	Agricultural soil	NA	0.27	0.0298605	42.3422	0	0.870908	2.28217	2.04235	10.3105	9.48929	2.88703	8.89326	3.01643	0.655245	0	0	0	4.10886	13.1018
SRR1926130	Soil	Agricultural soil	NA	0.24	0.0116584	42.3877	0	0.272383	4.88892	2.54317	11.482	9.7947	1.40588	15.1158	0.544766	0	0	0	0	3.41152	8.15322
SRR1926131	Soil	Agricultural soil	NA	0.13	0.0414143	44.0032	0	0.991913	7.72172	3.53624	7.0514	5.15518	6.63917	15.3026	2.00405	0	0	0	0	2.63108	4.96344
SRR1926147	Rhizosphere	Rhizosphere	Sugarcane	1.2	0	13.8134	0	0.711078	1.58932	6.35728	3.88972	2.77887	0.711078	32.3166	0	0	0	0	0	37.8326	0
SRR1926150	Rhizosphere	Rhizosphere	Sugarcane	0.94	0	57.7514	0	0	10.1935	6.79762	0	2.06659	8.26638	6.79762	0	0	0	0	0	0	8.12691
SRR1926159	Soil	Agricultural soil	NA	0.56	0.057129	38.9255	0	0	1.8127	0.554707	5.0963	11.9424	0	11.0701	0.554707	0	0	0	0	18.8112	11.2324
SRR1926199	Soil	Agricultural soil	NA	0.21	0	45.2091	0	0	12.3657	0	0	12.0502	1.95059	10.4151	0	0	0	0	0	10.4151	7.59422
SRR1926200	Soil	Agricultural soil	NA	0.12	0.0204785	52.6681	0	0	6.86917	0	8.52131	14.3186	0	17.6229	0	0	0	0	0	0	0
SRR1926201	Soil	Agricultural soil	NA	0.19	0.0354124	48.8624	0	0	5.566	1.21797	2.783	24.3798	0	11.9718	0	0	0	0	0	4.00097	1.21797
SRR2070858	Soil	Agricultural soil	NA	0.44	0.211604	4.16567	0	0	1.61306	1.61306	0	11.2914	0	73.925	2.55261	0	0	0	0	3.22612	1.61306
SRR2070862	Soil	Agricultural soil	NA	0.09	0.448928	37.5127	0	0	2.98085	2.98085	0	14.9042	0	38.6405	0	0	0	0	0	2.98085	0
SRR2070865	Soil	Agricultural soil	NA	0.32	0.221844	11.8101	0	0	2.11478	10.5739	1.2362	14.8035	0	58.2253	1.2362	0	0	0	0	0	0
SRR2546421	Soil	Grassland	NA	0	0	0	0	0	0	0	0	0	0	0	0	0	0	0	0	0	0
SRR2546422	Soil	Grassland	NA	0	0	0	0	0	0	0	0	0	0	0	0	0	0	0	0	0	0
SRR2546423	Soil	Grassland	NA	0	0	0	0	0	0	0	0	0	0	0	0	0	0	0	0	0	0
SRR2546425	Soil	Grassland	NA	0.17	0	35.15	0	0	1.40891	0	0	9.65226	0	53.7888	0	0	0	0	0	0	0
SRR2546426	Soil	Grassland	NA	0.13	0.0144004	32.7185	0	0	1.2326	0	0	0	0	61.1342	0	0	0	0	0	4.91471	0
SRR2546427	Soil	Grassland	NA	0.05	0	8.79024	0	0	0	2.04531	0	2.04531	0	87.1191	0	0	0	0	0	0	0
SRR2546428	Soil	Grassland	NA	0.18	0	19.3134	0	0	1.50506	2.57472	0	12.4361	0	61.596	0	0	0	0	0	2.57472	0
SRR2546429	Soil	Grassland	NA	0.34	0	69.6202	0	2.98166	10.0572	4.42989	0	5.96331	0	5.96331	0	0	0	0	0	0.98442	0
SRR2546430	Soil	Grassland	NA	0.33	0	62.8362	0	6.00593	14.5312	0	1.34243	6.75077	0	8.53349	0	0	0	0	0	0	0
SRR3591800	Soil	Agricultural soil	NA	0.47	0.0689891	28.5312	0	0	4.40767	0	0	6.6435	1.28986	59.1277	0	0	0	0	0	0	0
SRR3592089	Soil	Agricultural soil	NA	0.23	0	10.918	0	0	2.352	0	2.352	2.352	0	82.026	0	0	0	0	0	0	0
SRR3592090	Soil	Agricultural soil	NA	0.45	0	10.8238	0	0	2.01814	0	0	8.1107	0	70.8883	0	0	0	0	0	8.15904	0
SRR3592108	Soil	Agricultural soil	NA	0.23	0	26.9017	0	1.79938	0	3.03488	0	4.3494	0	43.5264	13.004	0	0	0	0	3.03488	4.3494
SRR3601981	Soil	Agricultural soil	NA	0.16	0	33.8087	0	0	12.824	0	0	2.05	0	28.5077	6.28603	0	0	0	0	16.5237	0
SRR3601982	Soil	Agricultural soil	NA	0.18	0	36.988	0	0	6.19446	0	0	0	0	34.9609	0	0	0	0	0	21.8566	0
SRR3601984	Soil	Agricultural soil	NA	0.35	0.119259	44.1385	0	0	11.856	0	3.37595	3.75575	0	35.1858	1.68798	0	0	0	0	0	0
SRR3601985	Soil	Agricultural soil	NA	0.1	0.0898129	14.6587	0	0	0	0	0	8.1003	0	25.9519	26.9882	0	0	0	0	8.1003	16.2006
SRR3601986	Soil	Agricultural soil	NA	0.14	0.0938161	55.2911	0	0	0	0	0	31.0014	0	0	13.7075	0	0	0	0	0	0
SRR3601987	Soil	Agricultural soil	NA	0.17	0	9.53427	0	0	0	0	20.0722	0	0	39.7791	9.16015	0	0	0	0	11.4183	10.0361
SRR3601989	Soil	Agricultural soil	NA	0.15	0	46.1735	0	0	15.3512	0	0	6.28592	0	15.566	16.6234	0	0	0	0	0	0
SRR3624110	Rhizosphere	Rhizosphere	Citrus	0.2	0.0872648	22.0398	0	2.79204	0	2.79204	2.79204	0	0	5.58407	0	0	0	0	0	41.888	22.1121
SRR3624124	Rhizosphere	Rhizosphere	Citrus	0.46	0	30.4917	0	0	2.79742	5.33566	8.91086	2.79742	0	7.87694	0	0	0	0	0	35.0045	6.78542
SRR3624125	Rhizosphere	Rhizosphere	Citrus	0.22	0.0409489	22.7113	0	0	2.56078	5.6896	25.4678	16.0841	0	24.9257	0	0	0	0	0	0	2.56078
SRR3624126	Rhizosphere	Rhizosphere	Citrus	0.37	0.0320597	37.2291	0	0	14.2032	0	1.73891	12.4615	0	19.3383	1.73891	0	0	0	0	7.70266	5.58748
SRR3624158	Rhizosphere	Rhizosphere	Citrus	0.79	0	16.0156	0	0	3.23692	1.14834	2.08858	1.14834	0	3.77156	0	0	0	0	0	35.2827	37.308
SRR3624173	Rhizosphere	Rhizosphere	Citrus	0.44	0	39.4528	0	0	6.12595	5.28317	3.64429	2.48879	0	12.167	3.78379	0	0	0	0	14.0951	12.9591
SRR3624174	Rhizosphere	Rhizosphere	Citrus	0.17	0.0481414	44.4871	0	1.22695	3.68085	0	6.38291	9.97677	0	19.9029	0	0	0	0	0	2.4539	11.8885
SRR3624175	Rhizosphere	Rhizosphere	Citrus	0.45	0	35.1048	0	0.869972	12.3252	2.81516	0	8.49147	0	4.39587	3.54123	0	0	0	0	28.2076	4.24876
SRR3624176	Rhizosphere	Rhizosphere	Citrus	0.3	0.0620364	42.0001	0	0	2.53311	4.90374	9.80747	10.8125	0	13.7145	0	0	0	0	0	9.97289	6.25566
SRR3624177	Rhizosphere	Rhizosphere	Citrus	0.42	0.110893	34.2022	0	0	4.99916	0	11.5397	9.77487	2.85931	25.4613	0	0	0	0	0	4.4007	6.76275
SRR3624178	Rhizosphere	Rhizosphere	Citrus	0.59	0.0399961	28.017	0	0	9.5341	0	6.29846	13.8426	0	16.6793	11.6155	0	0	0	0	4.81308	9.19996
SRR3624179	Rhizosphere	Rhizosphere	Citrus	0.3	0.0769847	46.887	0	0	0	5.98586	0	13.5058	3.45379	11.7282	11.5317	0	0	0	0	6.90757	0
SRR3954445	Soil	Grassland	NA	0.26	0.0321532	49.2244	0	1.63077	9.4022	1.9381	6.32111	18.0241	0	6.30939	2.67671	0	0	0	0	1.36553	3.10776
SRR3954446	Soil	Grassland	NA	0.28	0	44.1107	0	0.233761	16.4433	3.36566	4.35051	18.051	0	8.72265	1.29951	0	0	0	0	1.8242	1.59863
SRR3954447	Soil	Grassland	NA	0.25	0.0321061	44.2151	0	1.20308	11.383	1.85512	2.86591	17.0762	0.367351	12.0466	0.967164	0.417862	0	0	0.417862	3.10705	4.0776
SRR3954448	Soil	Grassland	NA	0.17	0.0325666	49.91	0	1.0978	11.1708	2.66415	4.9436	12.7009	1.38261	7.48382	1.09191	0	0	0	0.53023	1.86035	5.16381
SRR3954449	Soil	Grassland	NA	0.25	0.023388	50.901	0	0	18.2296	1.10534	5.43162	13.5355	0	7.57577	0.588221	0	0	0	0	1.59866	1.03423
SRR3954450	Soil	Grassland	NA	0.15	0.0119588	44.2514	0	1.34176	14.8334	3.43399	2.59757	19.2758	0.584924	9.15681	0	0	0	0	0	0.292462	4.23179
SRR3954451	Soil	Grassland	NA	0.29	0.0361804	51.6087	0	1.34186	13.3866	4.06679	2.40091	12.1541	0.336516	9.2917	1.51729	0	0	0	0.336516	2.54949	1.00955
SRR3954452	Soil	Grassland	NA	0.23	0.0418228	48.2304	0	0.891075	10.4765	1.13014	6.68863	13.7798	0.953821	11.9349	0	0	0	0	0	3.3451	2.56958
SRR3954453	Soil	Grassland	NA	0.27	0.00629528	48.0069	0	0.287528	10.2741	5.16142	2.37738	16.9849	0.876407	9.27798	0	0	0	0	0	3.07157	3.68179
SRR3954454	Soil	Grassland	NA	0.23	0.0420611	43.1509	0	0	15.4576	2.23938	2.47221	19.3104	3.33022	4.7116	1.34363	0	0	0	0	3.76408	4.21994
SRR3954455	Soil	Grassland	NA	0.26	0.0245846	46.6529	0	0.726092	14.9269	1.83176	4.59116	18.1399	0.755387	7.10859	0.424204	0	0	0	0	0.610587	4.23253
SRR3954462	Soil	Grassland	NA	0	0	0	0	0	0	0	0	0	0	0	0	0	0	0	0	0	0
SRR3954463	Soil	Grassland	NA	0.25	0.0379217	42.6129	0	0.29013	16.4427	3.72178	4.24359	19.2033	1.17587	5.20259	0.29013	0	0	0	0	1.7837	5.03338
SRR3954464	Soil	Grassland	NA	0.26	0.0234418	52.0248	0	1.5098	13.7421	3.23382	4.69801	13.4896	0	6.46085	0.833109	1.06311	0	0	0.618881	0.272036	2.05387
SRR3954465	Soil	Grassland	NA	0.21	0.0483809	45.069	0	1.74385	10.6241	1.97165	3.31489	15.2587	0.714822	8.60394	1.99129	0	0	0	0	5.79036	4.91735
SRR3954466	Soil	Grassland	NA	0.21	0.0290319	48.0515	2.70608	0.340924	11.6645	1.45501	0.340924	13.5697	2.0816	10.3921	2.0668	0.340924	0	0	0	2.1013	4.8886
SRR3954467	Soil	Grassland	NA	0.23	0.034972	47.2314	0	0	15.5004	3.01538	2.43394	13.9506	0	10.1941	1.65902	0	0	0	0	1.597	4.41821
SRR3954468	Soil	Grassland	NA	0.19	0.0294655	54.0284	0	1.86464	12.1677	2.01782	3.94425	13.9997	1.77484	7.85736	0.480685	0.21129	0	0	0	0	1.65335
SRR3954469	Soil	Grassland	NA	0.2	0.0252275	44.6795	0.804784	0.919753	13.2818	3.92916	6.74843	14.6425	1.07894	8.10722	0.459876	0.202143	0	0	0	3.36203	1.78392
SRR3954470	Soil	Grassland	NA	0.21	0.0333939	46.067	0	0.775978	11.589	2.07556	3.85082	15.6353	0.799237	9.01048	2.1187	0	0	0	0	2.88039	5.1976
SRR3954471	Soil	Grassland	NA	0.23	0.0109797	66.4247	0	1.68023	10.1729	2.3797	1.03195	7.80407	1.92813	5.57684	0	0	0	0	0	1.96945	1.03195
SRR3954472	Soil	Grassland	NA	0.2	0.0386715	43.3312	0	2.22584	20.2028	0.691828	4.49694	15.7901	0	6.95133	0	0.691828	0	0	0	0	5.61812
SRR3954473	Soil	Grassland	NA	0.2	0.0445995	51.3907	0	0.943144	15.1654	1.03104	4.02843	16.5409	1.27566	4.29993	0.917186	0	0	0	0	1.22667	3.181
SRR3954474	Soil	Grassland	NA	0.2	0.0115955	44.8335	0	1.63024	15.7231	1.69867	3.63896	17.7245	0	9.48991	0.732604	0	0	0	0	0	4.52855
SRR3972293	Soil	Forest	NA	0	0.0535345	0	0	0	0	0	0	0	0	0	0	0	0	0	0	0	0
SRR3974376	Soil	Forest	NA	0	0.104448	0	0	0	0	0	0	0	0	0	0	0	0	0	0	0	0
SRR3977097	Soil	Forest	NA	0.12	0.0530518	48.5198	0	0	3.02433	0	3.02433	29.5691	0	9.00909	6.85334	0	0	0	0	0	0
SRR3977098	Soil	Forest	NA	0.13	0	59.7481	0	0	11.6733	0	0	17.1084	0	0	6.49481	4.97549	0	0	0	0	0
SRR3977135	Soil	Forest	NA	0.09	0.0383394	43.2132	0	0	9.30622	2.72592	0	13.7712	4.14104	7.24312	6.20415	0	0	0	0	0	13.3951
SRR3977136	Soil	Forest	NA	0.16	0.0905696	53.9112	0	0	4.84422	0	11.0725	20.4836	0	9.68844	0	0	0	0	0	0	0
SRR3977139	Soil	Forest	NA	0	0	0	0	0	0	0	0	0	0	0	0	0	0	0	0	0	0
SRR3977438	Soil	Forest	NA	0.31	0.0534261	45.7023	0	0	8.04757	0	9.41314	9.95134	0	11.9492	2.9873	0	0	0	0	5.97459	5.97459
SRR3977439	Soil	Forest	NA	0.07	0	34.8888	0	0	30.6676	0	2.68757	8.82109	0	12.2671	0	0	0	0	0	0	10.6678
SRR3978361	Soil	Forest	NA	0.15	0.0809741	46.9533	0	3.75059	13.0744	0	6.47627	14.2319	0	5.83425	0	0	0	0	2.91713	0	6.76222
SRR3978390	Soil	Forest	NA	0	0	0	0	0	0	0	0	0	0	0	0	0	0	0	0	0	0
SRR3979409	Soil	Forest	NA	0	0	0	0	0	0	0	0	0	0	0	0	0	0	0	0	0	0
SRR3979410	Soil	Forest	NA	0.17	0.0413267	60.0621	0	0	19.241	2.6232	0	10.2041	0	0	2.6232	0	0	0	0	0	5.2464
SRR3979453	Soil	Forest	NA	0.17	0.0846309	60.7004	0	5.43711	8.14593	7.6408	0	8.14593	1.78392	4.07296	0	0	0	0	0	0	4.07296
SRR3979454	Soil	Forest	NA	0.15	0	48.7131	0	3.90258	20.8426	0	4.42362	17.6945	0	4.42362	0	0	0	0	0	0	0
SRR3981189	Soil	Forest	NA	0.14	0	47.8109	0	0	5.27181	5.27181	2.28746	25.0902	0	0	0	0	0	0	0	8.99594	5.27181
SRR3981190	Soil	Forest	NA	0.15	0.0652623	58.1634	0	0	0	0	2.15008	23.3612	6.55361	4.88584	0	0	0	0	0	4.88584	0
SRR3982069	Soil	Grassland	NA	0.42	0	46.7062	0	0	25.8752	0	0	0	0	27.4186	0	0	0	0	0	0	0
SRR3982074	Soil	Forest	NA	0.43	0.0363013	56.685	0	0	8.95206	2.85721	3.58605	19.9966	1.45767	4.06737	0	0	0	0	0	0	2.3981
SRR3982075	Soil	Forest	NA	0.23	0.0913502	55.0342	0	0	11.7372	8.28635	4.09137	9.4588	0	9.11368	0	2.27842	0	0	0	0	0
SRR3982488	Soil	Grassland	NA	0.19	0	8.82186	0	0	36.2822	9.72269	13.3393	4.41093	0	0	17.7003	0	0	0	0	0	9.72269
SRR3983528	Soil	Grassland	NA	0.06	0.0763445	26.8712	0	0	0	0	0	51.2162	0	21.9126	0	0	0	0	0	0	0
SRR3983531	Soil	Forest	NA	0.24	0	57.4445	0	0	0	7.80898	0	19.1286	0	15.618	0	0	0	0	0	0	0
SRR3983532	Soil	Grassland	NA	0.18	0	49.2633	0	0	28.0851	0	0	9.06066	0	9.06066	0	0	0	0	0	0	4.53033
SRR3984567	Soil	Grassland	NA	0	0	0	0	0	0	0	0	0	0	0	0	0	0	0	0	0	0
SRR3984669	Soil	Grassland	NA	0.18	0	50.922	0	0	26.0586	0	9.23413	0	0	13.7852	0	0	0	0	0	0	0
SRR3984684	Soil	Grassland	NA	0.28	0.0619453	31.8832	0	0	6.20582	23.1227	12.4116	11.2117	0	15.1649	0	0	0	0	0	0	0
SRR3984701	Soil	Grassland	NA	0.41	0	37.917	0	0	25.7528	5.58739	5.58739	17.073	0	5.58739	0	0	0	0	0	0	2.495
SRR3984702	Soil	Grassland	NA	0	0	0	0	0	0	0	0	0	0	0	0	0	0	0	0	0	0
SRR3984705	Soil	Grassland	NA	0.18	0	39.9084	0	0	9.58708	6.64851	12.5256	6.64851	0	12.1562	0	0	0	0	0	2.93857	9.58708
SRR3984706	Soil	Grassland	NA	0.33	0.0651443	44.7447	0	0	15.1555	12.9919	4.96262	19.664	0	2.48131	0	0	0	0	0	0	0
SRR3984869	Soil	Grassland	NA	0.36	0	33.4712	0	0	8.51091	9.55029	2.12773	26.0486	0	13.3883	0	0	0	0	4.77515	0	2.12773
SRR3984885	Soil	Grassland	NA	0.04	0.044106	35.0888	0	0	12.1845	4.98849	2.27334	6.65132	0.735857	25.6783	0	2.23024	0	0	2.23024	4.61318	3.32566
SRR3988227	Rhizosphere	Rhizosphere	Switchgrass	0.03	0.0151123	62.7472	0	8.3772	0	0	8.3772	20.4984	0	0	0	0	0	0	0	0	0
SRR3988230	Rhizosphere	Rhizosphere	Switchgrass	0.18	0	38.456	0	4.80883	0	6.41177	21.9328	11.2667	0	2.12713	0	0	0	0	0	14.9968	0
SRR3988232	Rhizosphere	Rhizosphere	Switchgrass	0	0.0208883	0	0	0	0	0	0	0	0	0	0	0	0	0	0	0	0
SRR3988233	Rhizosphere	Rhizosphere	Switchgrass	0	0.0232952	0	0	0	0	0	0	0	0	0	0	0	0	0	0	0	0
SRR3988234	Rhizosphere	Rhizosphere	Switchgrass	0	0.0514466	0	0	0	0	0	0	0	0	0	0	0	0	0	0	0	0
SRR3988235	Rhizosphere	Rhizosphere	Switchgrass	0.07	0	75.4381	0	0	0	3.13342	0	14.2857	0	0	0	0	0	0	0	7.14284	0
SRR3988236	Rhizosphere	Rhizosphere	Switchgrass	0.22	0.0154453	30.7727	0	0	10.0761	12.787	9.09644	10.6296	0	3.97228	0.895027	0	0	0	0	18.8897	2.88117
SRR3988237	Rhizosphere	Rhizosphere	Switchgrass	0.21	0.0183051	41.5426	0	0	1.4485	0	8.76067	6.47325	0	13.4458	0	0	0	0	0	28.3291	0
SRR3988238	Rhizosphere	Rhizosphere	Switchgrass	0.12	0.0388702	31.6335	0	0	6.21321	4.04489	6.32162	12.1347	0	5.99905	6.17969	1.3483	0	0	0	26.125	0
SRR3988239	Rhizosphere	Rhizosphere	Switchgrass	0.3	0.0812749	23.4545	0	0	8.75138	1.2095	5.84838	23.9256	0	5.45359	2.7268	0	0	0	0	25.9034	2.7268
SRR3988262	Soil	Agricultural soil	NA	0.04	0.0324569	18.9476	0	0	11.6692	14.2705	0	23.3384	0	20.1051	5.83459	0	0	0	0	5.83459	0
SRR3988263	Soil	Agricultural soil	NA	0.06	0.0540894	31.02	0	0	0	7.755	0	26.7241	0	3.45906	27.5828	0	0	0	0	3.45906	0
SRR3988264	Soil	Agricultural soil	NA	0.07	0.0546777	21.5638	0	1.2673	5.06921	8.21411	10.6667	24.1516	0.55881	15.0511	1.82611	0	0	0	0	10.3638	1.2673
SRR3988265	Soil	Agricultural soil	NA	0.05	0	73.2071	0	0	0	4.85568	0	10.9686	0	0	0	0	0	0	0	0	10.9686
SRR3989261	Rhizosphere	Rhizosphere	Maize	0.74	0.0258261	14.5383	0	0.457514	1.62993	1.84413	1.51195	2.22231	0.0527616	3.11802	1.66596	0	0	0	0	72.3433	0.615798
SRR3989262	Rhizosphere	Rhizosphere	Maize	0.53	0.0217196	15.3567	0	0.29438	2.11617	2.95675	1.54612	4.15547	0.275671	4.19289	0.495832	0	0	0	0	68.3156	0.29438
SRR3989263	Rhizosphere	Rhizosphere	Maize	2.67	0.0153271	4.1002	0	0.0848205	0.595446	0.358479	0.279414	0.497478	0.0221628	0.575125	0.157804	0.0480452	0	0	0	93.1081	0.172951
SRR3989265	Rhizosphere	Rhizosphere	Maize	0.5	0.0195227	37.1893	0	0.611808	7.19118	0.995077	4.08187	4.70646	1.24039	5.47589	0.766949	0	0	0	0	37.4308	0.310281
SRR3989266	Rhizosphere	Rhizosphere	Maize	0.7	0.00479317	12.1816	0	0.109729	2.57805	1.50779	1.53101	1.73619	0.164594	2.04734	0.850183	0	0	0	0.161982	76.5552	0.576272
SRR3989267	Rhizosphere	Rhizosphere	Maize	0.37	0.0219301	25.4194	0	0.235312	4.53087	3.01807	2.43058	5.98795	0.429635	7.86406	0.978461	0	0	0	0	46.6822	2.42345
SRR3989268	Rhizosphere	Rhizosphere	Maize	1.33	0.0198201	9.50755	0	0.0599726	1.28275	0.569949	0.237034	1.58789	0.297854	0.737793	0.189983	0	0	0	0	84.8293	0.699959
SRR3989283	Rhizosphere	Rhizosphere	Switchgrass	0.18	0.0379343	34.0675	0	0	7.94468	3.31562	7.04924	7.83934	0.289217	11.9922	0.934078	0	0	0	0	24.0551	2.51302
SRR3989284	Rhizosphere	Rhizosphere	Switchgrass	0.19	0.0151241	43.8518	0	0.511321	7.88024	3.92615	9.51127	10.8367	0	13.8209	2.62917	0	0	0	0	6.46328	0.569138
SRR3989285	Rhizosphere	Rhizosphere	Switchgrass	0.25	0.0677916	45.9341	0	1.27145	5.7168	3.86726	6.12298	18.918	1.2984	4.67961	0	0	0	0	0	10.0976	2.09381
SRR3989286	Rhizosphere	Rhizosphere	Switchgrass	0.17	0.0145994	49.7434	0	1.86599	5.83646	3.28494	9.50875	10.5249	0.266218	6.9074	2.8711	0.603744	0	0	0	2.76136	5.82569
SRR3989294	Rhizosphere	Rhizosphere	Switchgrass	0.23	0.0126548	38.4467	0	0.242383	4.66155	3.34182	11.5148	11.7464	1.21774	13.3695	0.727149	0	0	0	0	13.4544	1.27747
SRR3989440	Soil	Grassland	NA	0.23	0	54.6464	0	5.89473	9.88257	0	2.52631	19.5185	0	2.52631	0	0	0	0	0	0	5.00518
SRR3989441	Soil	Grassland	NA	0.17	0	35.15	0	0	1.40891	0	0	9.65226	0	53.7888	0	0	0	0	0	0	0
SRR3989442	Soil	Grassland	NA	0.19	0	26.7943	0	0	9.3619	5.71915	1.4454	4.48621	0	52.1931	0	0	0	0	0	0	0
SRR3989449	Soil	Grassland	NA	0.1	0	27.8193	0	0	5.65286	0	0	3.57219	0	62.9557	0	0	0	0	0	0	0
SRR3989454	Soil	Grassland	NA	0.13	0.0144004	32.7185	0	0	1.2326	0	0	0	0	61.1342	0	0	0	0	0	4.91471	0
SRR3989475	Soil	Grassland	NA	0.05	0	8.79024	0	0	0	2.04531	0	2.04531	0	87.1191	0	0	0	0	0	0	0
SRR4027993	Rhizosphere	Rhizosphere	Arabidopsis thaliana	0.22	0.380105	11.0544	0	0	0.929204	0	0.929204	4.95792	0	15.8045	2.01436	2.01436	0	0	0	58.4233	3.87277
SRR4027994	Rhizosphere	Rhizosphere	Arabidopsis thaliana	0.19	0.159115	12.276	0	0	3.16084	0.83029	3.0786	11.1629	0	20.9669	2.75797	1.06622	0	0	0	43.6718	1.02841
SRR4027997	Rhizosphere	Rhizosphere	Arabidopsis thaliana	0.14	0.0814486	15.6792	0	4.21443	12.1735	6.08677	1.87234	8.42886	0	24.2545	0	0	0	0	0	20.04	7.25035
SRR4027998	Rhizosphere	Rhizosphere	Arabidopsis thaliana	0.25	0.0488806	20.9906	0	0	6.99757	1.16182	0.705947	8.20125	0.70088	20.47	1.37951	0	0	0.387273	0	37.0687	1.93636
SRR4030077	Soil	Forest	NA	0.15	0.102768	31.3754	0	2.04738	20.6826	7.93984	6.26026	14.5679	5.76165	2.04738	0	0	0	0	0	0	9.31759
SRR4030078	Soil	Forest	NA	0	0	0	0	0	0	0	0	0	0	0	0	0	0	0	0	0	0
SRR4030079	Soil	Forest	NA	0.55	0.0527163	67.0833	0	1.67184	9.66897	0.734874	0.734874	8.38488	0	3.92239	0	0	0	0	0	1.67184	6.12701
SRR4030080	Soil	Forest	NA	0.07	0.0284925	73.2947	0	0	13.7304	0	0	6.1097	0	0	0	0	0	0	0	0	6.8652
SRR4030085	Soil	Forest	NA	0.22	0.0240546	44.1942	0	0	13.9644	4.39949	6.35232	18.3443	0	10.7721	0	0	0	0	0	0	1.97315
SRR4030086	Soil	Forest	NA	0.08	0.0273508	25.0634	6.03974	0	21.4835	3.01987	14.828	6.8353	0	9.85517	3.01987	0	0	0	0	0	9.85517
SRR4030091	Soil	Forest	NA	0.19	0	54.8077	0	0	18.7976	1.76841	0	9.42457	0	11.193	4.00882	0	0	0	0	0	0
SRR4030097	Soil	Forest	NA	0.17	0.0576558	72.071	0	0	8.44076	1.88238	0	6.10276	0	4.22038	0	0	0	0	0	0	7.28273
SRR4051794	Soil	Grassland	NA	0.14	0	57.1734	0	1.90904	15.4793	1.90904	4.24823	13.2488	0	2.75869	0	0	0	0	0	3.27348	0
SRR4051795	Soil	Grassland	NA	0.18	0.0117328	42.7804	0	1.46687	15.3315	5.36583	2.70567	14.9393	0	10.0557	0	0	0	0	0	1.57713	5.77752
SRR4051812	Soil	Grassland	NA	0.11	0.0134451	62.1952	0	0	8.39615	2.01959	7.22137	9.99611	0.887733	2.90732	0	0	0	0	0	3.46924	2.90732
SRR4140278	Rhizosphere	Rhizosphere	Agave	0.13	0	16.8821	0	0.121184	0.959421	1.09978	0.121184	1.17461	0.274945	0.918686	0	0	0	0	0	0.191175	78.2569
SRR5195106	Rhizosphere	Rhizosphere	Citrus	0.13	0.0506663	30.5468	0	0	14.2305	5.79357	1.32453	4.56135	0	27.0737	5.89272	0	0	0	0	9.2522	1.32453
SRR5195107	Rhizosphere	Rhizosphere	Citrus	0.19	0.0643302	50.0651	0	0	10.8464	9.38934	0	7.79786	0	16.4686	1.32861	0	0	0	0	3.66779	0.436244
SRR5195108	Rhizosphere	Rhizosphere	Citrus	0.31	0.0292889	29.8456	0	0	8.25107	0	19.4393	11.018	0.456076	6.55907	11.0312	2.06049	0	0	0.456076	5.23277	5.6503
SRR5195109	Rhizosphere	Rhizosphere	Citrus	0.55	0.0425323	30.0123	0	0.732887	7.25201	2.714	2.02517	4.49917	0	48.5787	0.931114	0	0	0	0	0.931114	2.32358
SRR5195110	Rhizosphere	Rhizosphere	Citrus	0.22	0.0221086	28.2494	0	0	0	0.42613	2.83962	5.2825	1.87257	22.8513	14.3636	0	0	0	0	22.4935	1.62137
SRR5195111	Rhizosphere	Rhizosphere	Citrus	0.26	0.010767	8.76617	0	1.28576	1.77195	0.2904	1.86656	5.35032	0	73.6007	1.78042	0	0	0	0	4.46462	0.823086
SRR5195112	Rhizosphere	Rhizosphere	Citrus	0.18	0.0169462	21.9656	0	0	1.8568	2.23152	0.9113	6.78801	0	21.5746	11.4685	0	0	0	0	30.4101	2.79354
SRR5195113	Rhizosphere	Rhizosphere	Citrus	0.16	0.017416	24.062	0	0	7.76706	7.50025	0	10.3858	1.30704	40.7876	2.50008	0	0	0	0	2.50008	3.19013
SRR5195114	Rhizosphere	Rhizosphere	Citrus	0.5	0.124123	17.1391	0	0	3.67433	2.80759	4.17257	1.50205	0.305702	1.86401	3.38026	0	0	0	0	53.4048	11.7496
SRR5195115	Rhizosphere	Rhizosphere	Citrus	0.17	0.0498888	42.5505	0	1.56781	9.01828	9.00354	1.1308	5.82426	0.783903	22.382	3.6972	0	0	0	0	1.56781	2.47395
SRR5195116	Rhizosphere	Rhizosphere	Citrus	0.27	0.010296	40.1225	0	1.19126	3.18989	0.686131	5.25922	3.57243	0	24.9741	1.4861	0	0	0	0	17.1359	2.38252
SRR5195117	Rhizosphere	Rhizosphere	Citrus	0.62	0.0682275	61.1271	0	0.572626	8.768	4.96845	0.95113	6.93126	3.05254	3.5085	0	0	0	0	0	7.42826	2.69212
SRR5195118	Rhizosphere	Rhizosphere	Citrus	1.21	0.0524344	1.6506	0	0.0612237	0.366464	0.134048	0.686712	0	0.182792	0.865217	0.181922	0	0	0	0	93.3463	2.52476
SRR5195119	Rhizosphere	Rhizosphere	Citrus	0.42	0.0104882	37.6822	0	0.702873	25.2206	4.37068	2.81149	9.9111	0.487786	12.2449	0.430174	0.853626	0	0	0	1.40575	3.87885
SRR5195120	Rhizosphere	Rhizosphere	Citrus	0.37	0.00487281	43.7066	0	2.12404	17.054	2.08726	8.13284	11.4783	0.506479	9.92577	1.56814	0	0	0	0	1.40653	2.01006
SRR5195121	Rhizosphere	Rhizosphere	Citrus	0.29	0.0621462	33.2577	0	0	5.01097	9.06026	2.67175	4.20599	0.53665	5.96735	2.99727	0	0	0	0	29.8655	6.42655
SRR5195122	Rhizosphere	Rhizosphere	Citrus	0.24	0.0147739	38.5509	0	2.14575	7.06498	3.33934	1.30045	2.86099	0	12.1623	8.49248	0	0	0	0	22.4124	1.67043
SRR5195123	Rhizosphere	Rhizosphere	Citrus	0.14	0.00779795	39.2746	0	4.92152	4.72776	4.97099	2.80087	9.64929	0	10.0034	8.83751	0	0	0	0	6.56203	8.252
SRR5195124	Rhizosphere	Rhizosphere	Citrus	0.4	0.0237359	59.7538	0	0	11.0424	4.49039	5.32837	5.90325	1.28105	4.8111	0.408302	1.68888	0	0	0	3.53722	1.75526
SRR5195125	Rhizosphere	Rhizosphere	Citrus	0.35	0.0252697	52.953	0	0.542961	8.51533	1.15343	3.57321	11.3406	0.271481	4.89303	2.45703	1.05651	0	0	0	11.2697	1.97374
SRR5195126	Rhizosphere	Rhizosphere	Citrus	1.27	0.0341844	45.6299	0	0.601998	3.14051	0.670558	2.21909	7.08209	3.80039	1.09696	0.910683	0	0	0	0	33.8194	1.0284
SRR5195127	Rhizosphere	Rhizosphere	Citrus	0.26	0.016216	39.3942	0	0.923063	4.95392	0.704704	2.66024	8.46425	0	16.4536	1.96302	0	0	0	0	15.8495	8.63352
SRR5195128	Rhizosphere	Rhizosphere	Citrus	0.21	0.0110178	18.5064	0	0	4.33639	1.27245	1.66283	15.0473	0	49.2587	1.05034	0	0	0	2.32035	4.20772	2.33752
SRR5195129	Rhizosphere	Rhizosphere	Citrus	0.36	0.0154066	20.0418	0	0	2.72938	1.11468	5.23367	5.15547	0	37.1086	0.972674	0	0	0	0	27.0018	0.642023
SRR5195130	Rhizosphere	Rhizosphere	Citrus	0.2	0.00494273	12.8469	0	0	8.85596	0	3.84605	6.37111	0	61.2972	1.73649	0	0	0	0	4.25643	0.789821
SRR5195131	Rhizosphere	Rhizosphere	Citrus	0.51	0.0711759	48.1615	0	0.666818	6.64591	1.66868	2.98582	13.2404	2.70684	5.3573	2.16304	0	0	0	0	9.24559	7.15817
SRR5195132	Rhizosphere	Rhizosphere	Citrus	0.31	0.0279769	40.7331	0	0	2.74109	0.475235	12.8639	20.0703	2.21702	5.2741	14.3735	0	0	0	0	0	1.25173
SRR5195133	Rhizosphere	Rhizosphere	Citrus	0.22	0.0320006	6.60176	0	0	1.24407	0.321629	0.752207	2.41674	0.108682	1.24047	0.0543411	0.224774	0	0	0	0.310418	86.7249
SRR5195134	Rhizosphere	Rhizosphere	Citrus	0.23	0.0786802	52.8065	0	0	9.78621	2.37757	3.9755	14.7406	0	6.50492	5.28001	0	0	0	0	0	4.52872
SRR5195135	Rhizosphere	Rhizosphere	Citrus	0.88	0.0856084	27.5841	0	4.97481	5.89551	1.1909	0.968086	2.83355	1.37809	41.4737	0.198719	0	0	0	0	9.81652	3.68599
SRR5195136	Rhizosphere	Rhizosphere	Citrus	0.27	0.0525985	5.19759	0	0.570294	2.11273	0.972138	0.808198	4.58209	0	78.9475	6.00128	0	0	0	0	0.808198	0
SRR5195137	Rhizosphere	Rhizosphere	Citrus	0.6	0.0739805	37.7413	0	0.293187	1.76335	0	5.67011	5.12872	0.293187	1.15623	0	0	0	0	0	31.1296	16.8242
SRR5195138	Rhizosphere	Rhizosphere	Citrus	0.24	0.0257039	48.5731	0	0.284251	9.51692	3.87033	3.35518	12.4244	0.284251	6.39507	1.28928	0	0	0	0	10.6025	3.40468
SRR5195139	Rhizosphere	Rhizosphere	Citrus	0.33	0.0204918	51.6602	0	0	7.61312	3.11702	2.16804	13.6881	0	8.30668	1.91413	0.837422	0	0	0.211004	6.73533	3.74891
SRR5195140	Rhizosphere	Rhizosphere	Citrus	0.26	0	52.4455	0	0	13.9121	0.504712	2.15404	10.4407	0	5.37088	2.29562	0	0	0	0	2.89214	9.98426
SRR5195141	Rhizosphere	Rhizosphere	Citrus	0.26	0.0287389	38.3069	0	0.661194	5.86488	1.28588	0.75125	9.47753	6.6115	2.78838	0.75125	0	0	0	0	28.5142	4.98707
SRR5195142	Rhizosphere	Rhizosphere	Citrus	0.2	0.0421913	23.5256	0	2.08441	10.6142	1.38963	6.17149	12.4699	0.2902	12.6745	0	0	0	0	0	16.5366	14.2435
SRR5195143	Rhizosphere	Rhizosphere	Citrus	1.66	0.0340364	34.1804	0	0.605421	55.3295	0.631258	0.461232	1.91697	0.639729	1.02443	0.579311	0.201807	0	0	0	2.84077	1.58919
SRR5195144	Rhizosphere	Rhizosphere	Citrus	0.28	0.00531015	59.0486	0	0	3.09453	8.47442	2.97195	15.9691	0.911846	6.28793	0	0	0	0	0	0.980375	2.26133
SRR5195145	Rhizosphere	Rhizosphere	Citrus	0.28	0.00889877	59.3992	0	0	8.71646	2.95196	8.08173	6.07169	0.977264	3.19368	0.960001	0	0	0	0	7.75924	1.88877
SRR5195146	Rhizosphere	Rhizosphere	Citrus	0.13	0	49.3055	0	0	19.8523	3.92348	5.45755	10.509	0	7.06636	0	0	0	0	0	0	3.88575
SRR5195147	Rhizosphere	Rhizosphere	Citrus	0.36	0.0185196	59.8805	0	0.923186	5.98264	4.46872	3.18945	9.43153	1.89436	4.12796	2.82574	0	0	0	0	4.06503	3.21088
SRR5195148	Rhizosphere	Rhizosphere	Citrus	0.34	0.00549092	55.0991	0	1.91253	10.5411	2.16796	6.32262	10.0206	0	7.647	1.14626	0	0	0	0	1.14626	3.99647
SRR5215813	Soil	Forest	NA	0.19	0.0391395	41.7867	0	1.03596	8.31791	4.73567	1.03596	14.523	0	11.0153	2.04061	0.517982	0	0	0	8.75241	6.23846
SRR5234505	Rhizosphere	Rhizosphere	Acacia dealbata	0.18	0.0303584	45.0646	0	0	25.9928	1.93049	11.9418	13.1398	0	0	0	0	0	0	0	0	1.93049
SRR5234506	Rhizosphere	Rhizosphere	Acacia dealbata	0.16	0.0460961	44.0378	0	0	13.7719	0	0	14.8433	6.88594	10.2305	0	0	0	0	0	10.2305	0
SRR5234507	Rhizosphere	Rhizosphere	Acacia dealbata	0.18	0	40.4735	0	0	0	0	0	39.8985	8.19122	8.76629	0	0	0	0	0	0	2.67049
SRR5234508	Rhizosphere	Rhizosphere	Acacia dealbata	0.07	0.0648833	46.3069	0	0	7.78862	0	0	21.0051	3.89431	17.1108	0	0	0	0	0	0	3.89431
SRR5234509	Rhizosphere	Rhizosphere	Acacia dealbata	0.08	0.065374	53.3576	0	0	0	0	0	46.6424	0	0	0	0	0	0	0	0	0
SRR5234510	Rhizosphere	Rhizosphere	Acacia dealbata	0.3	0.0709356	57.8351	0	0	13.9934	0	0	13.4157	0	12.2223	0	0	0	0	0	2.53351	0
SRR5234511	Rhizosphere	Rhizosphere	Acacia dealbata	0	0	0	0	0	0	0	0	0	0	0	0	0	0	0	0	0	0
SRR5234512	Rhizosphere	Rhizosphere	Acacia dealbata	0.27	0	57.0572	0	0	9.60767	0	2.25873	19.21	0	2.25873	4.51746	0	0	0	0	0	5.09021
SRR5247115	Rhizosphere	Rhizosphere	Silvergrass	0.31	0	48.218	0	0	1.50755	0	16.3669	3.35542	0	13.6608	12.0284	0	0	0	0	4.86297	0
SRR5247130	Rhizosphere	Rhizosphere	Silvergrass	0.14	0.0295978	29.82	0	1.76362	14.4714	2.54156	16.4206	19.3998	0	9.21807	3.8234	0	0	0	0	0	2.54156
SRR5247131	Rhizosphere	Rhizosphere	Silvergrass	0.15	0.0170129	36.3705	0	0	8.26393	6.9995	21.2873	9.86704	2.52885	2.86754	2.86754	0	0	0	0	7.68336	1.26443
SRR5247132	Rhizosphere	Rhizosphere	Silvergrass	0.1	0	37.8652	0	0	3.7536	1.15686	10.7198	10.3869	0	24.0077	4.60277	0	0	0	0	2.59674	4.91046
SRR5247133	Rhizosphere	Rhizosphere	Silvergrass	0.17	0.0247004	51.1602	0	0	3.09285	1.89758	15.913	9.60313	0	14.2916	3.09285	0	0	0	0	0.948789	0
SRR5248464	Rhizosphere	Rhizosphere	Silvergrass	0.09	0	38.5649	0	0	14.5297	5.33761	3.85448	18.6816	1.18567	16.6603	0	0	0	0	0	1.18567	0
SRR5248466	Rhizosphere	Rhizosphere	Silvergrass	0.25	0.0219742	48.9159	0	0.210011	11.1478	7.78461	9.1959	6.51018	0	11.588	1.95745	0.476274	0	0	0	0.952548	1.26139
SRR5248520	Rhizosphere	Rhizosphere	Silvergrass	0.1	0.0163252	51.8061	0	0.321372	4.73376	2.10039	10.209	12.332	1.0502	8.33845	1.66925	0	0	0	0	6.15406	1.28549
SRR5248580	Rhizosphere	Rhizosphere	Silvergrass	0.14	0	37.4573	0	0	0.952624	15.1664	16.7311	18.9908	0	0	3.87767	0	0	0	0	5.87155	0.952624
SRR5248581	Rhizosphere	Rhizosphere	Silvergrass	0.18	0.0152156	48.4373	0	1.54312	7.68001	3.08625	7.35006	8.99473	1.12977	13.1663	3.71236	0	0	0	0	3.80562	1.09448
SRR5256888	Rhizosphere	Rhizosphere	Tabebuia heterophylla	0.25	0.0512509	36.8774	0	0.234364	4.59018	3.69906	13.2479	19.2859	0	5.24472	2.52724	0	0	0	0	5.79349	8.4997
SRR5256985	Rhizosphere	Rhizosphere	Tabebuia heterophylla	0.45	0.0489262	51.593	0	1.39158	7.42739	1.21553	3.53852	6.4034	1.05234	6.86647	3.83162	0.29989	0	0	0	10.6101	5.7701
SRR5256987	Rhizosphere	Rhizosphere	Tabebuia heterophylla	0.68	0.0269292	47.0496	0	0.709456	13.3355	5.80793	2.12861	18.5009	0	3.55419	0	0	0	0	0	3.55187	5.36194
SRR5256988	Rhizosphere	Rhizosphere	Tabebuia heterophylla	0.52	0.0512184	46.5124	0	0.210382	9.91394	3.57734	4.50638	23.5781	0.238558	8.64742	0.426327	0	0	0	0	0.820866	1.56833
SRR5259830	Soil	Agricultural soil	NA	0.15	0.0586598	78.2842	0	0	12.2986	0	0	0	0	9.41727	0	0	0	0	0	0	0
SRR5259831	Soil	Agricultural soil	NA	0.02	0.0556321	65.8012	0	0	0	22.7992	0	0	0	11.3996	0	0	0	0	0	0	0
SRR5259832	Soil	Agricultural soil	NA	0	0.0350535	0	0	0	0	0	0	0	0	0	0	0	0	0	0	0	0
SRR5259833	Soil	Agricultural soil	NA	0.1	0	56.8216	0	0	17.378	0	0	11.5853	0	14.215	0	0	0	0	0	0	0
SRR5259834	Soil	Agricultural soil	NA	0.07	0.0616131	61.2597	0	0	0	8.11042	3.53012	8.11042	0	10.8789	0	0	0	0	0	8.11042	0
SRR5259835	Soil	Agricultural soil	NA	0.09	0.065226	26.4696	0	0	0	8.88634	0	0	0	64.6441	0	0	0	0	0	0	0
SRR5259836	Soil	Agricultural soil	NA	0.23	0.133498	75.3056	0	0	16.4629	0	0	0	0	4.11574	0	0	0	0	0	4.11574	0
SRR5259837	Soil	Agricultural soil	NA	0.1	0	66.911	0	0	22.0593	0	0	0	0	11.0297	0	0	0	0	0	0	0
SRR5259838	Soil	Agricultural soil	NA	0.1	0	29.2285	0	0	47.738	0	0	23.0336	0	0	0	0	0	0	0	0	0
SRR5259839	Soil	Agricultural soil	NA	0.07	0	39.176	0	0	0	11.0644	0	32.5189	0	17.2408	0	0	0	0	0	0	0
SRR5259938	Soil	Agricultural soil	NA	0	0.0843239	0	0	0	0	0	0	0	0	0	0	0	0	0	0	0	0
SRR5259939	Soil	Agricultural soil	NA	0.16	0	43.7241	0	0	17.5344	0	0	9.73166	0	22.5434	0	0	0	0	0	0	6.46632
SRR5259940	Soil	Agricultural soil	NA	0.04	0.0606401	46.9183	0	0	0	0	0	0	0	53.0817	0	0	0	0	0	0	0
SRR5260067	Soil	Agricultural soil	NA	0.16	0	44.9518	0	0	22.3827	0	4.89403	4.89403	0	22.8774	0	0	0	0	0	0	0
SRR5260068	Soil	Agricultural soil	NA	0.16	0	55.5231	0	0	15.9906	0	6.98657	0	0	21.4997	0	0	0	0	0	0	0
SRR5260069	Soil	Agricultural soil	NA	0.21	0.0918561	34.5409	0	0	0	7.34429	0	11.1449	0	46.9699	0	0	0	0	0	0	0
SRR5260070	Soil	Agricultural soil	NA	0.12	0.0309702	6.6926	0	0	0	5.57386	0	0	0	87.7335	0	0	0	0	0	0	0
SRR5260071	Soil	Agricultural soil	NA	0.12	0.031391	54.6885	0	0	7.44385	7.44385	0	7.60596	7.60596	15.2119	0	0	0	0	0	0	0
SRR5260072	Soil	Agricultural soil	NA	0.23	0	51.4977	0	0	6.79675	10.1951	2.32005	5.09757	0	24.0928	0	0	0	0	0	0	0
SRR5260073	Soil	Agricultural soil	NA	0.11	0.0371361	54.8336	0	0	11.2207	0	0	5.16366	0	28.7821	0	0	0	0	0	0	0
SRR5260182	Soil	Agricultural soil	NA	0.05	0.0643933	43.4699	0	0	12.6287	0	0	6.31434	0	31.2728	0	0	0	0	0	0	6.31434
SRR5260183	Soil	Agricultural soil	NA	0.13	0.0294154	37.7358	0	0	17.9545	18.0963	0	0	0	26.2135	0	0	0	0	0	0	0
SRR5260184	Soil	Agricultural soil	NA	0.19	0.0703651	39.3073	0	0	15.2303	9.97913	0	5.61661	0	29.8666	0	0	0	0	0	0	0
SRR5260185	Soil	Agricultural soil	NA	0.06	0.0635416	0	0	0	27.1069	0	6.97386	0	0	65.9193	0	0	0	0	0	0	0
SRR5260186	Soil	Agricultural soil	NA	0.29	0	8.28418	0	0	0	0	0	3.86001	0	87.8558	0	0	0	0	0	0	0
SRR5260187	Soil	Agricultural soil	NA	0.12	0.109038	59.9991	0	0	4.88352	4.88352	0	0	0	27.4156	0	0	0	0	0	0	2.81827
SRR5260188	Soil	Agricultural soil	NA	0.12	0	23.0571	0	0	0	0	0	0	0	76.9429	0	0	0	0	0	0	0
SRR5260217	Soil	Agricultural soil	NA	0.16	0.0293214	16.1738	0	0	12.0833	0	5.97692	0	0	62.7775	2.98846	0	0	0	0	0	0
SRR5260272	Soil	Agricultural soil	NA	0.18	0.0695174	7.07414	0	0	0	0	0	7.07414	0	85.8517	0	0	0	0	0	0	0
SRR5260273	Soil	Agricultural soil	NA	0.24	0	7.54861	0	0	4.77017	4.77017	0	4.77017	0	78.1409	0	0	0	0	0	0	0
SRR5260274	Soil	Agricultural soil	NA	0.31	0	0	0	0	0	4.59665	0	13.79	0	81.6134	0	0	0	0	0	0	0
SRR5260275	Soil	Agricultural soil	NA	0.13	0.0996336	7.4311	0	0	0	0	0	18.0051	0	65.5612	0	0	0	0	0	9.00255	0
SRR5269546	Rhizosphere	Rhizosphere	Arabidopsis thaliana	0.04	0.0135163	33.7397	0	0	0	16.0677	0	11.5683	0	16.0677	22.5566	0	0	0	0	0	0
SRR5269726	Rhizosphere	Rhizosphere	Arabidopsis thaliana	0.03	0.043239	47.977	0	0	10.7742	0	2.05406	11.2387	0	4.5923	4.5923	0	0	0	0	0	18.7714
SRR5270116	Rhizosphere	Rhizosphere	Arabidopsis thaliana	0.17	0	35.3191	0	0	12.8953	5.75673	8.31001	4.00157	0	0	22.6973	0	0	0	0	7.38969	3.63037
SRR5451359	Rhizosphere	Rhizosphere	Switchgrass	0.15	0.0758297	32.9182	0	0.638089	4.86509	1.20845	9.55935	7.96337	0	5.45989	3.80361	0	0	0	0	32.0903	1.49363
SRR5451372	Rhizosphere	Rhizosphere	Silvergrass	0.13	0	37.853	0	0	5.89091	3.95543	20.3326	12.1645	0	9.42816	7.639	0	0	0	0	0	2.73637
SRR5451373	Rhizosphere	Rhizosphere	Silvergrass	0.09	0.0155745	44.3109	0	0	7.19087	1.31397	21.1106	9.37555	1.62963	11.213	0.911884	0	0	0	0	0	2.9436
SRR5451374	Rhizosphere	Rhizosphere	Maize	0.07	0.0109656	46.0825	0	0.385894	11.0328	4.29601	8.06698	18.9149	0	8.41042	0.771788	0	0	0	0	1.65284	0.385894
SRR5451376	Rhizosphere	Rhizosphere	Maize	0.26	0.0136515	22.0566	0	0.561315	3.95323	1.33367	3.54073	10.5861	0.736456	22.7726	1.25687	0	0	0	0	27.328	5.87446
SRR5451422	Rhizosphere	Rhizosphere	Maize	0.18	0.0114521	27.5031	0	0	6.75303	3.26019	3.39283	8.77127	0.214149	15.1348	1.58985	0	0	0	0.638369	29.8313	2.91111
SRR5451449	Rhizosphere	Rhizosphere	Maize	0.19	0.0177471	27.766	0	0.250674	7.8385	1.55138	2.76399	10.5243	0.250674	4.82656	1.7302	0	0	0	0	37.688	4.80971
SRR5451450	Rhizosphere	Rhizosphere	Maize	0.28	0.00237453	35.7753	0	0.144511	4.53578	3.29784	7.22392	6.11842	0.907992	2.8897	0.758618	0.580805	0	0	0.434221	36.8993	0.433533
SRR5451451	Rhizosphere	Rhizosphere	Maize	0.22	0.00866718	26.1222	0	0.81945	0.586604	2.64457	3.51969	7.99134	0.81945	2.57819	0.586604	0.42838	0	0	0	53.1387	0.764868
SRR5451458	Rhizosphere	Rhizosphere	Maize	0.11	0.00405224	37.6614	0	0	5.1792	2.09254	4.08715	7.07755	1.0471	5.30184	1.0471	0.781586	0	0	0	35.7245	0
SRR5451461	Rhizosphere	Rhizosphere	Switchgrass	0.26	0.0117273	64.2843	0	0	5.40838	1.78943	4.73882	7.25918	0	3.61264	2.06323	7.62082	0	0	0	0.620923	2.60226
SRR5451564	Rhizosphere	Rhizosphere	Switchgrass	0.14	0.105247	38.7768	0	0.301285	4.64355	5.48914	3.40639	6.61337	0.301285	13.3966	6.05838	0	0	0	0	17.5937	3.41946
SRR5451578	Rhizosphere	Rhizosphere	Switchgrass	0.13	0.0064424	38.3515	0	2.03369	4.17918	2.36197	20.5446	9.63911	0	12.0975	1.01685	0	0	0	0	2.38568	7.38997
SRR5451581	Rhizosphere	Rhizosphere	Switchgrass	0.31	0.24444	44.8445	0	1.2298	5.89088	2.86767	5.05621	24.1982	0.53949	2.59409	3.25295	0.269745	0	0	0	7.29628	1.96024
SRR5451585	Rhizosphere	Rhizosphere	Switchgrass	0.11	0.0257358	44.94	0	0	7.04363	3.18454	7.39352	16.6386	2.70702	7.24251	1.67093	0	0	0	0	8.78868	0.390607
SRR5451590	Rhizosphere	Rhizosphere	Switchgrass	0.11	0.0201522	43.4964	0	0	9.4941	0.587111	13.5182	9.87433	0	4.92676	4.9407	2.27327	0	0	0	8.60195	2.28721
SRR5451657	Rhizosphere	Rhizosphere	Silvergrass	0.13	0.0100677	44.9044	0	1.19559	1.19559	2.39118	18.8478	10.7774	0	8.97547	0	0	0	0	0	6.95316	4.75936
SRR5451658	Rhizosphere	Rhizosphere	Silvergrass	0.12	0	35.7382	0	0	8.17632	4.60621	32.9093	8.86897	0	7.42802	0	0	0	0	0	0	2.27305
SRR5451659	Rhizosphere	Rhizosphere	Silvergrass	0.16	0.0141032	40.8608	0	1.10908	10.9339	7.6007	9.70317	10.5441	0.678782	11.1244	0.678782	0	0	0	0	0.76969	5.99661
SRR5451664	Rhizosphere	Rhizosphere	Silvergrass	0.07	0.0202647	40.9069	0	0	2.99793	2.99793	7.91389	25.0202	0	14.146	4.51821	0	0	0	0	0	1.49896
SRR5451670	Rhizosphere	Rhizosphere	Silvergrass	0.09	0.0378652	55.7044	0	0	2.90575	1.43307	8.40923	16.6557	0	9.64038	2.18921	0	0	0	0	2.34571	0.716533
SRR5451679	Rhizosphere	Rhizosphere	Silvergrass	0.09	0	25.981	0	0	6.11079	2.80235	30.9533	4.07738	1.27503	15.2868	7.90861	0	0	0	0	5.60471	0
SRR5451700	Soil	Agricultural soil	NA	0	0	0	0	0	0	0	0	0	0	0	0	0	0	0	0	0	0
SRR5451714	Rhizosphere	Rhizosphere	Silvergrass	0.1	0.0198336	41.4587	0	0	0	9.65252	16.1979	6.41037	0	15.3235	7.17281	0	0	0	0	0	3.78419
SRR5451725	Soil	Agricultural soil	NA	0	0	0	0	0	0	0	0	0	0	0	0	0	0	0	0	0	0
SRR5451739	Soil	Agricultural soil	NA	0.09	0.0125329	51.402	0	0	6.3683	1.232	13.3993	9.17219	0	10.0543	1.59717	0	0	0	0	3.94234	2.83238
SRR5451810	Soil	Agricultural soil	NA	0.11	0.0163495	58.8503	0	0	6.58866	5.20457	6.34667	8.19784	0.287829	5.79326	1.45852	0	0	0	0	4.44483	2.82755
SRR5452023	Soil	Agricultural soil	NA	0.18	0.0135937	53.0212	0	0	4.53286	0.716557	4.83083	12.3823	0	6.23756	4.35963	0	0	0	0	12.4826	1.43654
SRR5452084	Soil	Agricultural soil	NA	0.1	0.0201534	50.9681	0	0.406903	10.8033	0.919165	9.28586	8.16713	1.54111	8.8922	2.24523	0	0	0	0	4.61455	2.1565
SRR5452139	Soil	Agricultural soil	NA	0.09	0.0181163	53.5488	0	0	7.66753	1.27282	2.3913	16.1664	1.70729	8.63064	2.3913	0	0	0	0	6.22387	0
SRR5452140	Soil	Agricultural soil	NA	0.13	0.0156955	38.9331	0	0.44573	4.92446	2.78432	11.3869	6.79057	0	8.91809	0.891461	0	0	0	0	23.2158	1.70954
SRR5452141	Soil	Agricultural soil	NA	0.15	0.0317598	37.0598	0	0.521298	8.38874	4.85468	14.8764	10.2235	0	7.06813	2.74192	0	0	0	0	14.2655	0
SRR5452142	Soil	Agricultural soil	NA	0.2	0.0188141	33.3374	0	0	3.2192	5.19761	7.74563	7.35668	0	7.0914	6.29754	0	0	0	0	27.5056	2.24896
SRR5452232	Soil	Agricultural soil	NA	0.22	0.0318871	41.475	0	1.02362	8.46309	1.02362	4.17931	7.91313	1.26383	9.78062	4.25388	0	0	0	0	20.3073	0.316527
SRR5452256	Soil	Agricultural soil	NA	0.12	0.0158457	46.3115	0	2.51794	8.68053	2.15235	6.89377	18.0938	0	2.99247	0.474533	0	0	0	0	9.09673	2.78644
SRR5456702	Soil	Agricultural soil	NA	0.17	0.00301816	39.1293	0	0.58906	5.20793	0.850916	0.850916	6.35397	0	11.3493	5.85342	0.58906	0	0	0	29.2262	0
SRR5456703	Soil	Agricultural soil	NA	0.13	0.0201881	24.5969	0	1.08002	4.003	1.7936	0.62907	12.0479	0	49.2457	1.7936	0	0	0	0	3.73017	1.08002
SRR5456737	Soil	Agricultural soil	NA	0.09	0.0134354	56.3348	0	0	2.44311	1.59444	1.84451	20.741	0.372882	8.76116	1.22156	0	0	0	0	3.76758	2.9189
SRR5456787	Soil	Agricultural soil	NA	0.11	0.00301681	42.5459	0	0.779468	4.93457	1.38132	0.691484	13.075	0	22.7912	2.36555	0	0	0	0	10.3983	1.03723
SRR5456800	Soil	Agricultural soil	NA	0.12	0.0255542	35.1875	0	3.10316	6.82735	4.12461	4.06152	9.6445	0.456467	26.6714	0.912935	0	0	0	0	6.94176	2.06877
SRR5456801	Soil	Agricultural soil	NA	0.09	0.0267375	39.61	0	1.19515	8.23667	2.05581	2.39031	9.22674	2.05303	21.9682	0.990069	1.58975	0	0	0	7.09883	3.58546
SRR5456833	Soil	Agricultural soil	NA	0.16	0.0237673	33.4614	0	0.891404	4.2141	1.29147	3.94236	9.81094	0	35.8457	3.25427	0	0	0	0	5.1055	2.18287
SRR5456904	Soil	Agricultural soil	NA	0.09	0.00675186	44.1317	0	0	7.03036	3.21623	10.0508	13.9735	0.403925	11.85	4.49508	0	0	0	1.67642	1.56398	1.60811
SRR5456944	Soil	Agricultural soil	NA	0.1	0.00878803	48.5392	0	0.564589	11.5845	3.13347	10.8601	7.78877	1.72905	7.4314	4.79081	0	0	0	0	0	3.57808
SRR5456945	Soil	Agricultural soil	NA	0.03	0.0748102	49.3523	0	0	15.9609	7.98043	1.58477	13.3715	0	10.1653	0.792383	0	0	0	0	0	0.792383
SRR5456946	Soil	Agricultural soil	NA	0.18	0.00353466	39.3612	0	1.87572	4.98649	2.75146	13.0987	13.9007	0.937861	10.9622	8.66156	0	0	0	0	2.88951	0.574619
SRR5456958	Soil	Agricultural soil	NA	0.11	0.0145515	41.614	0	2.88529	6.10767	2.25182	6.74591	16.881	0.961762	10.9022	9.41294	0	0	0	0	0.425248	1.81226
SRR5456965	Soil	Agricultural soil	NA	0.09	0.0144349	49.7411	0	1.04122	11.3161	2.08243	3.95583	5.95956	0	16.7955	9.10817	0	0	0	0	0	0
SRR5456967	Soil	Agricultural soil	NA	0.03	0.0202448	43.6378	0	2.60252	8.80297	0	2.68023	12.6996	0	23.3431	3.35664	0	0	0	0	2.20074	0.676409
SRR5456970	Soil	Agricultural soil	NA	0.07	0.0252875	44.3222	0	0	5.44883	1.53779	2.49661	20.2629	0	15.0615	2.93451	0	0	0	0	0	7.93567
SRR5456973	Soil	Agricultural soil	NA	0.08	0.0167044	44.6647	0	0	9.5569	0.422798	4.25818	14.5658	0.958846	17.7189	3.83539	0	0	0	0	0.958846	3.05963
SRR5456974	Soil	Agricultural soil	NA	0.24	0.0305342	46.6176	0	0.51541	8.80919	1.17831	4.16368	8.12597	0.622173	23.1197	0.793476	1.07869	0	0	0	2.93806	2.03782
SRR5456975	Soil	Agricultural soil	NA	0.49	0.0235885	35.9091	0	0.439097	7.39201	1.42079	4.58114	11.2434	0.146366	30.4231	0.719021	0	0	0	0	3.35272	4.37328
SRR5456976	Soil	Agricultural soil	NA	0.49	0.00543424	28.5983	0	0	6.358	1.84796	4.64371	9.29766	0	42.9063	2.20191	0	0	0	0	0.900184	3.24602
SRR5456985	Soil	Agricultural soil	NA	0.36	0.007732	38.8943	0	0.21827	6.30974	2.02119	2.32308	12.701	0	33.6999	0.373398	0	0	0	0.373398	1.96556	1.12019
SRR5456986	Soil	Agricultural soil	NA	0.41	0.0219862	32.6853	0	0	8.92005	1.19952	1.39234	8.23738	0	42.9254	1.00671	0	0	0	0	0	3.63326
SRR5456988	Soil	Agricultural soil	NA	0.21	0.0212831	57.3395	0	0	7.84367	0	2.70307	7.61782	0	16.0031	5.15563	0	0	0	0	2.17854	1.1587
SRR5460454	Rhizosphere	Rhizosphere	Populus deltoides	0.56	0.083258	56.1105	0	0.803929	4.09265	1.78344	2.47504	2.76296	27.2443	0.401964	0	0	0	0	0	3.15368	1.17147
SRR5460455	Rhizosphere	Rhizosphere	Populus deltoides	0.13	0.0324781	41.9329	0	0	3.51437	2.92151	10.2184	5.9528	5.3147	4.86736	10.814	0.342269	0	0	0.987913	1.24321	11.8906
SRR5460457	Rhizosphere	Rhizosphere	Populus deltoides	0.22	0.0340373	9.94317	0	0.375123	0	3.00098	4.11329	5.57981	1.66251	3.4716	0	0	0	0	0	1.40797	70.4455
SRR5460458	Rhizosphere	Rhizosphere	Populus deltoides	0	0	0	0	0	0	0	0	0	0	0	0	0	0	0	0	0	0
SRR5460461	Rhizosphere	Rhizosphere	Populus deltoides	0.08	0.0143326	40.049	0	0.769945	2.13797	3.506	4.62055	11.7795	9.88911	8.765	13.2236	0	0	0	0	3.3779	1.88144
SRR5460462	Rhizosphere	Rhizosphere	Populus deltoides	0.3	0	49.2348	0	0.997127	2.62566	0	2.99138	2.86948	15.7776	1.99425	0	0	0	0	0	11.2841	12.2256
SRR5460463	Rhizosphere	Rhizosphere	Populus deltoides	0.25	0.02058	54.5438	0	1.55292	1.49772	3.77115	1.21579	5.37928	15.194	4.54687	0.810527	0	0	0	0	1.90743	9.58053
SRR5460480	Rhizosphere	Rhizosphere	Populus deltoides	0.31	0.0180305	41.4956	0.307409	0	8.0729	0.134913	0.348361	0.413819	9.34522	0.922226	0	0	0	0	0	2.29352	36.666
SRR5460690	Rhizosphere	Rhizosphere	Populus deltoides	0.2	0.0608486	55.8629	0	0	3.75728	1.61212	3.61392	8.18847	2.36982	13.1188	3.17073	0	0	0	0	6.71532	1.59058
SRR5460691	Rhizosphere	Rhizosphere	Populus deltoides	0.29	0.0255089	48.2359	0	0	2.54041	0	7.82854	4.16509	1.2702	18.7774	3.83469	0	0	0	0	0	13.3478
SRR5460692	Rhizosphere	Rhizosphere	Populus deltoides	0.22	0.0361718	46.6999	0	2.53445	8.06066	5.09837	3.99147	7.11627	0.562227	11.9282	0	0	0	0	0	0.562227	13.4462
SRR5460694	Rhizosphere	Rhizosphere	Populus deltoides	0.15	0.0331813	50.2675	0	1.60973	3.57322	1.31667	4.46673	9.58616	0.951394	6.38079	12.8708	0	0	0	0	2.17804	6.79896
SRR5496025	Rhizosphere	Rhizosphere	Populus deltoides	0.25	0.159542	47.2514	0	0	7.9128	0	1.49949	11.0923	0.37173	15.0325	1.66747	0	0	0	0	8.61882	6.55359
SRR5496027	Soil	Agricultural soil	NA	0.15	0.0131611	58.4319	0	2.13182	4.07012	1.62018	5.62614	11.8355	0.257695	8.38796	2.18257	0	0	0.997579	0.257695	2.52396	1.67686
SRR5496028	Soil	Agricultural soil	NA	0.19	0.0268853	55.0588	0	0.93088	6.10825	1.29173	2.08533	12.4126	1.15445	13.5985	2.83056	1.15186	0	0	0	1.15445	2.22261
SRR5506996	Rhizosphere	Rhizosphere	Maize	0.35	0.0266481	17.3752	0	0	1.97142	1.22221	4.73593	1.97142	0	2.91069	2.34704	0	0	0	0	66.0538	1.41229
SRR5506998	Rhizosphere	Rhizosphere	Maize	0.15	0.0320338	27.3434	0	0.863457	3.00341	1.44559	2.3188	7.76941	0	5.54925	3.17814	0	0	0	0	47.602	0.926499
SRR5507163	Rhizosphere	Rhizosphere	Maize	0.52	0.00718593	13.1918	0	0.107039	1.11918	0.696125	1.48681	3.00916	0.107039	2.40408	0.656611	0	0	0	0	77.1151	0.107039
SRR5507178	Rhizosphere	Rhizosphere	Maize	0.16	0.0245226	39.2644	0	0.772007	3.36674	1.12225	3.79098	15.3611	0	9.26903	1.04904	0	0	0	0	26.0045	0
SRR5508059	Rhizosphere	Rhizosphere	Maize	0.9	0.0390386	2.75925	0	0.11832	1.25234	0.23664	0	1.64173	0	3.23427	0.11832	0	0	0	0	90.5208	0.11832
SRR5508097	Rhizosphere	Rhizosphere	Maize	0.16	0.0154467	32.4293	0	0	7.72571	1.74042	5.43561	8.92994	0	6.35481	0.58916	0.435104	0	0	0.586355	34.0742	1.69934
SRR5509277	Rhizosphere	Rhizosphere	Maize	0.35	0.0319567	12.935	0	0.517509	0.871654	0.354145	2.64532	2.41871	0	3.29583	3.07407	0	0	0	0	72.7488	1.13889
SRR5511004	Rhizosphere	Rhizosphere	Switchgrass	0.18	0.0192488	27.6954	0	0	2.088	3.07823	4.65314	6.69238	0	5.523	2.30267	0	0	0	0	47.9672	0
SRR5511291	Rhizosphere	Rhizosphere	Switchgrass	0.13	0.319654	44.4369	0	1.85443	3.70885	2.78582	1.70774	11.0089	2.05837	14.9381	4.79354	0	0	0	0	10.3771	2.33026
SRR5511879	Rhizosphere	Rhizosphere	Switchgrass	0.16	0.054247	38.0731	0	0	4.75462	3.61695	19.4878	16.6801	3.25041	8.51584	2.94034	0	0	0	0	1.81094	0.869822
SRR5517144	Rhizosphere	Rhizosphere	Silvergrass	0.14	0.0103994	43.4177	0	0	10.4077	6.33583	10.0061	8.58335	0	9.74881	6.70318	0	0	0	0.618158	2.50568	1.67355
SRR5517431	Rhizosphere	Rhizosphere	Switchgrass	0.16	0.00929994	54.6107	0	0	5.64404	0.397007	13.8507	9.18789	0	1.69437	4.10693	0	0	0	1.63701	8.87139	0
SRR5574089	Rhizosphere	Rhizosphere	Silvergrass	0.11	0.0239918	27.0197	0	2.08799	16.067	9.72318	13.3971	5.43112	0.53926	14.1703	5.05482	0	0	0	0	4.06371	2.44593
SRR5574261	Rhizosphere	Rhizosphere	Silvergrass	0.07	0.00944977	40.0522	0	0	10.1067	4.68158	14.2805	8.70191	0	13.5287	2.75848	0	0	0	0	5.20639	0.683478
SRR5574262	Rhizosphere	Rhizosphere	Silvergrass	0.17	0.0185974	51.1255	0	0.953312	9.66948	1.24504	8.71608	10.5306	0.291724	5.24144	6.06609	0	0	0	0	3.40941	2.75137
SRR5574263	Rhizosphere	Rhizosphere	Silvergrass	0.14	0.0043482	38.6759	0	0	8.36504	4.75892	18.061	7.56341	0	7.27757	9.83582	0	0	0	1.29176	1.91919	2.25135
SRR5576206	Rhizosphere	Rhizosphere	Silvergrass	0.12	0.00306689	40.9326	0	0	5.15034	5.16623	14.585	6.9797	0.314698	13.5536	7.07019	1.21754	0	0	0	2.17752	2.85251
SRR5578835	Rhizosphere	Rhizosphere	Switchgrass	0.13	0.264188	42.4214	0	0	5.21077	1.10498	1.10498	20.0198	0.55249	9.72106	8.15404	0	0	0	0	11.7106	0
SRR5578837	Rhizosphere	Rhizosphere	Switchgrass	0.17	0.0620425	39.6376	0	0.864798	5.81822	6.55993	11.6394	4.8241	0	5.78891	3.54997	0	0	0	0	18.7578	2.55926
SRR5579275	Rhizosphere	Rhizosphere	Switchgrass	0.08	0.0666735	53.109	0	0.48718	7.81823	2.45229	4.55912	5.97665	0	5.97665	2.55943	0	0	0	0	11.0848	5.97665
SRR5579859	Soil	Misc.	NA	0.34	0	44.8238	0	0	4.89367	2.28508	0.380846	15.4806	0	15.28	0	0	0	0	0	4.95998	11.896
SRR5579862	Soil	Misc.	NA	0.05	0.0579804	37.9407	0	3.59334	8.56934	3.59334	0	27.333	0	12.44	0	0	0	0	0	4.31966	2.21069
SRR5579863	Soil	Misc.	NA	0.16	0.0157141	31.3949	0	0	6.73224	2.0233	5.97878	16.9035	0	26.3661	0	0	0	0	0	3.02891	7.57226
SRR5579864	Soil	Misc.	NA	0.27	0.00792106	29.4395	0	0	7.97601	2.13268	7.88892	4.66277	0	41.2369	0	0	0	0	0	4.33038	2.33284
SRR5579871	Soil	Misc.	NA	0.23	0.0884198	59.6358	0	1.31733	6.00456	1.50114	1.31733	15.5743	0	4.97827	1.31733	0	0	0	0	0	8.35392
SRR5579872	Soil	Misc.	NA	0.51	0.0564022	38.5412	0	3.53121	3.44848	2.60656	3.4675	6.72843	0	24.4095	0.747893	0	0	0	0.978551	1.28472	14.2559
SRR5579875	Soil	Misc.	NA	0.16	0.15639	72.9716	0	0	5.12691	0.919694	0	5.05832	0.380938	14.6229	0.459847	0	0	0	0	0	0.459847
SRR5579883	Soil	Misc.	NA	0.17	0.0359579	38.0881	0	0	6.33668	0	1.58417	6.54993	0	39.0994	0	0	0	0	0	0	8.34176
SRR5579884	Soil	Misc.	NA	0.03	0.0794236	44.1257	0	4.70376	16.6882	2.6975	3.63576	8.09249	0	1.17411	0	0	0	0	0	0	18.8825
SRR5579885	Soil	Misc.	NA	0.09	0.0949657	2.58624	0	0	0	2.42209	0	1.87202	0	90.618	0.779546	1.72213	0	0	0	0	0
SRR5581483	Soil	Misc.	NA	0.13	0.0514123	36.176	0	2.17814	18.1561	3.33222	0.666444	6.42414	0.586345	23.897	0	0.959617	0	0	0	0.666444	6.95761
SRR5581992	Rhizosphere	Rhizosphere	Populus deltoides	0.12	0.0238203	24.5991	0	0.269494	2.8775	0.598982	9.45619	2.4948	0.808483	47.5002	1.05945	0	0	0	0	5.0808	5.2549
SRR5582001	Rhizosphere	Rhizosphere	Populus deltoides	0.27	0.00804007	49.7729	0	0.293792	1.6118	0	7.40157	2.42792	24.8879	6.93454	0	0	0	0	0	1.14888	5.52069
SRR5582372	Rhizosphere	Rhizosphere	Populus deltoides	0.23	0.038682	61.9565	0	0	4.73985	0	1.96172	14.651	0	11.0292	0	0	0	0	0	5.66175	0
SRR5582390	Rhizosphere	Rhizosphere	Populus deltoides	0.18	0.0141234	50.2322	0	4.73242	5.01254	2.57756	5.24296	8.31007	0.653391	15.6921	1.39776	0	0	0	0	2.93236	3.21668
SRR5582436	Rhizosphere	Rhizosphere	Populus deltoides	0.18	0.0318919	51.4626	0	0	8.44319	1.32528	2.01983	14.8326	0	12.6688	0.810216	0	0	0	0	6.46134	1.97614
SRR5582993	Rhizosphere	Rhizosphere	Populus deltoides	0.23	0.022085	58.0453	0	0	8.4644	3.68287	4.62403	14.2986	0	8.23758	0.769332	0	0	0	0	1.10857	0.769332
SRR5583252	Rhizosphere	Rhizosphere	Populus deltoides	0.24	0.0280802	50.1967	0	0	5.41251	0	6.89437	12.1095	0	13.2505	9.51951	0	0	0	0	1.74464	0.872321
SRR5583254	Rhizosphere	Rhizosphere	Populus deltoides	0.13	0.00611354	44.5125	0.965349	1.46181	3.89663	2.02747	4.16839	8.83156	0.324333	14.0163	9.45572	0	0	0	0	4.70978	5.6302
SRR5584097	Rhizosphere	Rhizosphere	Populus deltoides	0.13	0.058256	51.5765	0	0	4.62524	1.04116	2.95584	11.9855	0.347054	15.1742	5.17885	0	0	0	0	2.36121	4.75439
SRR5584873	Rhizosphere	Rhizosphere	Populus deltoides	0.08	0.0160397	51.1251	0	0.717514	7.80356	2.78432	2.80752	17.6989	0	9.90131	1.57498	0.315887	0	0	0	3.11843	2.15254
SRR5585385	Rhizosphere	Rhizosphere	Populus deltoides	0.09	0.0311719	39.5077	0	0	7.41834	2.50577	7.37618	19.3811	1.10444	12.8346	0	0	0	0	0	6.31996	3.55188
SRR5585387	Rhizosphere	Rhizosphere	Populus deltoides	0.14	0.0179783	35.5381	0	1.99317	3.50082	3.21958	1.31006	14.4632	2.73406	32.9993	0.511069	0	0	0	0	3.21958	0.511069
SRR5585388	Rhizosphere	Rhizosphere	Populus deltoides	0.18	0.0383043	49.7705	0	1.11227	4.12181	1.72809	3.4139	13.396	0.245225	16.2765	4.29214	0	0	0	0	3.15069	2.49294
SRR5585435	Rhizosphere	Rhizosphere	Populus deltoides	0.21	0.0319415	61.1132	0	2.36613	2.78223	3.85657	3.60195	11.5999	2.12345	10.6314	0	0	0	0	0	1.57742	0.347778
SRR5585586	Rhizosphere	Rhizosphere	Populus deltoides	0.23	0.0253468	52.8272	0	4.09441	10.5008	6.79877	0.359948	6.2541	0.359948	9.66185	3.61996	0	0	0	0	4.09441	1.42858
SRR5659263	Soil	Peat soil	NA	0	0	0	0	0	0	0	0	0	0	0	0	0	0	0	0	0	0
SRR5660397	Soil	Peat soil	NA	0	0.0509405	0	0	0	0	0	0	0	0	0	0	0	0	0	0	0	0
SRR5660398	Soil	Peat soil	NA	0	0.0682439	0	0	0	0	0	0	0	0	0	0	0	0	0	0	0	0
SRR5664279	Soil	Peat soil	NA	0.03	0.0162002	60.4892	0	0	5.76476	11.992	3.99732	11.992	0	1.76744	3.99732	0	0	0	0	0	0
SRR5664280	Soil	Peat soil	NA	0	0.0122271	0	0	0	0	0	0	0	0	0	0	0	0	0	0	0	0
SRR5665213	Soil	Peat soil	NA	0	0	0	0	0	0	0	0	0	0	0	0	0	0	0	0	0	0
SRR5665254	Soil	Peat soil	NA	0	0	0	0	0	0	0	0	0	0	0	0	0	0	0	0	0	0
SRR5665647	Soil	Peat soil	NA	0	0.0099484	0	0	0	0	0	0	0	0	0	0	0	0	0	0	0	0
SRR5665648	Soil	Peat soil	NA	0.01	0	58.3364	0	0	19.4455	0	4.44105	0	0	17.7771	0	0	0	0	0	0	0
SRR5665809	Soil	Peat soil	NA	0	0.042054	0	0	0	0	0	0	0	0	0	0	0	0	0	0	0	0
SRR5665811	Soil	Peat soil	NA	0.07	0.120016	17.9776	5.22246	0	25.8458	10.4449	2.31025	14.2613	0	5.22246	0	18.7152	0	0	0	0	0
SRR5674476	Soil	Peat soil	NA	0	0.0432541	0	0	0	0	0	0	0	0	0	0	0	0	0	0	0	0
SRR5674536	Soil	Peat soil	NA	0	0	0	0	0	0	0	0	0	0	0	0	0	0	0	0	0	0
SRR5680860	Soil	Peat soil	NA	0.03	0.0426373	51.7478	0	0	0	22.0753	0	0	0	26.1769	0	0	0	0	0	0	0
SRR5687767	Soil	Agricultural soil	NA	0.18	0	38.1348	0	0	1.50128	4.79988	16.4258	7.80244	0	3.29859	7.31992	0	0	0	0	20.7173	0
SRR5687768	Soil	Agricultural soil	NA	0.11	0	28.4306	0	3.4123	0	9.35493	23.1498	6.8246	0	0	5.93717	0	0	0	0	22.8907	0
SRR5688500	Soil	Agricultural soil	NA	0.16	0.0143075	38.6113	0	0	0	4.43154	22.8235	25.9253	0	0	0	0	0	0	0	6.85222	1.3561
SRR5688572	Soil	Agricultural soil	NA	0.1	0	31.1686	0	0	8.46969	5.22745	21.6977	5.22745	0	0	1.18958	0	0	0	0	22.4933	4.52621
SRR5689334	Soil	Agricultural soil	NA	0.29	0.0115915	33.6496	0	0	8.50663	0.659649	26.6791	6.09867	0	10.3739	8.70615	0	0	0	2.68143	0	2.64494
SRR5689906	Rhizosphere	Rhizosphere	Populus deltoides	0.07	0.0304963	52.678	0	0	7.92075	2.17906	5.74207	15.6386	0	5.24877	1.68614	0	0	0	0	4.45329	4.45329
SRR5689907	Rhizosphere	Rhizosphere	Populus deltoides	0.1	0.00522876	46.3516	0	3.77641	4.52468	3.41455	3.27914	11.8843	0	23.6966	0	0	0	0	0	1.2588	1.81387
SRR5689908	Rhizosphere	Rhizosphere	Populus deltoides	0.08	0.0412153	49.9815	0	1.15158	5.67367	1.52576	5.01474	16.8701	0	14.8021	0	0	0	0	0	3.96334	1.01717
SRR5689909	Rhizosphere	Rhizosphere	Populus deltoides	0.18	0.0355448	22.9196	0	0	4.73406	3.54762	2.73208	23.3446	3.10989	34.1317	0.404286	0	0	0	0	1.71278	3.36337
SRR5689928	Rhizosphere	Rhizosphere	Populus deltoides	0.22	0.0284547	53.6788	0	2.67555	6.4367	1.72922	6.78943	14.2552	0	12.2895	0	0	0	0	0	0.777875	1.36769
SRR5690242	Soil	Agricultural soil	NA	0.24	0.0118327	24.4361	0	0.731947	10.1246	0	18.5449	6.35141	0	25.2514	14.5596	0	0	0	0	0	0
SRR5690348	Soil	Agricultural soil	NA	0.22	0	19.4626	0	0	5.34474	1.11122	21.0879	6.05792	0	41.6694	5.26621	0	0	0	0	0	0
SRR5690349	Soil	Agricultural soil	NA	0.27	0	32.5584	0	0	2.27947	4.37185	18.9934	6.71914	3.22177	15.1538	4.74142	0	0	0	0	3.40423	8.55659
SRR5690554	Soil	Agricultural soil	NA	0.01	0	25.2299	0	0	68.6126	0	0	0	0	0	0	0	6.15753	0	0	0	0
SRR5690606	Soil	Agricultural soil	NA	0.08	0.00549418	18.3855	0	0.420934	62.6896	0	0.952004	2.97487	0	0	0.952004	0	6.04099	0	0	0	7.58413
SRR5690625	Soil	Agricultural soil	NA	0	0	0	0	0	0	0	0	0	0	0	0	0	0	0	0	0	0
SRR5699024	Soil	Agricultural soil	NA	0	0	0	0	0	0	0	0	0	0	0	0	0	0	0	0	0	0
SRR6056495	Rhizosphere	Rhizosphere	Maize	0.55	0.0241885	11.3078	0	0	1.44478	0.254489	1.06672	2.57395	0	5.58946	0.117393	0	0	0	0	77.019	0.626371
SRR6056496	Rhizosphere	Rhizosphere	Maize	0.6	0.0250012	10.8872	0	0	1.56376	0.387156	2.40444	4.52089	0	1.34006	0.387156	0	0	0	0	78.3308	0.178591
SRR6056499	Rhizosphere	Rhizosphere	Maize	0.17	0.00593055	27.7148	0	0.600003	7.24647	1.94725	10.1394	5.33983	0	13.8805	1.07598	0	0	0	0	31.4558	0.600003
SRR6056501	Rhizosphere	Rhizosphere	Maize	0.86	0.0110597	8.23782	0	0	1.09483	0.354577	0.329106	1.46056	0	2.72322	0.0664542	0	0	0	0	85.7334	0
SRR6056502	Rhizosphere	Rhizosphere	Maize	0.13	0.0165017	29.4322	0	0	2.43837	1.90456	5.35238	9.67584	0	8.82136	0	0	0	0	1.59675	39.9127	0.865845
SRR6056503	Rhizosphere	Rhizosphere	Maize	0.65	0.00249663	7.08482	0	0	1.27953	0.533118	0	1.7002	0	5.09548	0.189585	0	0	0	0	83.9781	0.139206
SRR6056504	Rhizosphere	Rhizosphere	Silvergrass	0.13	0.0284274	44.6141	0	0	8.21962	5.13139	6.7332	9.73976	0.338037	14.4461	2.43653	0	0	0	0	1.87677	6.46455
SRR6056506	Rhizosphere	Rhizosphere	Silvergrass	0.15	0.0058731	53.2648	0	0.485771	5.71648	3.8356	10.2934	8.05277	0.741501	11.2471	1.76526	0	0	0	0	0.55083	4.04648
SRR6056512	Rhizosphere	Rhizosphere	Silvergrass	0.17	0.0320707	48.89	0	0.796067	1.59213	0.796067	13.1087	8.73705	0	17.9662	0	0	0	0	0	5.68354	2.4303
SRR6056513	Rhizosphere	Rhizosphere	Silvergrass	0.13	0.0454346	57.2758	0	0	1.76386	1.47409	8.64636	8.35658	0	13.8927	2.77407	0	0	0	0	3.18217	2.63434
SRR6056514	Rhizosphere	Rhizosphere	Silvergrass	0.14	0.031732	56.464	0	0	8.99295	2.23806	7.21204	7.2091	0	12.4803	0.61588	0	0	0	0	3.39096	1.39673
SRR6056515	Rhizosphere	Rhizosphere	Silvergrass	0.05	0.00227341	49.8851	0	0	3.02682	5.39911	6.19467	5.86647	3.07411	9.75217	0	0	0	0	0	9.18111	7.62041
SRR6056522	Rhizosphere	Rhizosphere	Switchgrass	0.17	0.0522529	52.1816	0	0	7.79229	0.943265	12.3706	6.90151	0	5.04284	1.65979	0	0	0	1.24582	11.8623	0
SRR6056553	Rhizosphere	Rhizosphere	Switchgrass	0.04	0.00375433	55.3289	0	1.57229	4.52341	0.68941	0	6.51643	4.74651	12.1452	0	0	0	0	0	14.4779	0
SRR6056554	Rhizosphere	Rhizosphere	Switchgrass	0.31	0.0279248	46.2473	0	1.01643	5.90878	1.82775	4.20954	7.92632	1.12774	1.31954	2.82057	0	0	0	0	21.1912	6.40479
SRR6056556	Rhizosphere	Rhizosphere	Switchgrass	0.06	0.00260171	48.8814	0	0	2.79609	1.48277	8.65525	2.79609	1.98891	6.58775	0	0	0	0	0	8.93294	17.8788
SRR6056557	Rhizosphere	Rhizosphere	Switchgrass	0.08	0.00963417	53.5859	0	0	8.42418	4.81439	6.49405	5.58402	1.41221	12.3655	4.29647	0	0	0	0	1.04907	1.97423
SRR6214544	Rhizosphere	Rhizosphere	Silvergrass	0.23	0.0169157	46.3147	0	0.567521	3.75856	7.86567	11.1557	7.88284	0.633769	12.0838	2.80639	1.51343	0	0	0	4.22221	1.19536
SRR6435859	Rhizosphere	Rhizosphere	Arabidopsis thaliana	0.64	0	28.7686	0	0	5.41065	0	6.27919	5.67708	3.1263	2.31413	2.31413	0	0	0	0	46.1099	0
SRR6435862	Rhizosphere	Rhizosphere	Arabidopsis thaliana	2.25	0.0495404	11.448	0	0	0	0	0	1.5936	0	2.19487	0	0	0	0	0	83.3654	1.39807
SRR6435880	Rhizosphere	Rhizosphere	Arabidopsis thaliana	0.28	0	45.018	0	0	8.57624	0	2.60692	17.908	0	11.9387	0	0	0	0	0	7.9829	5.96933
SRR6435881	Rhizosphere	Rhizosphere	Arabidopsis thaliana	0.63	0.0682715	5.69777	0	0	0	0	7.08291	3.91209	0	6.79216	1.78568	0	0	0	0	70.8173	3.91209
SRR6435882	Rhizosphere	Rhizosphere	Arabidopsis thaliana	0.43	0	38.4298	0	1.53165	1.53165	0	1.53165	0	1.53165	4.63525	0	0	0	0	0	50.8084	0
SRR6435883	Rhizosphere	Rhizosphere	Arabidopsis thaliana	0.5	0.0405217	11.0633	0	0	2.58351	0	0	0	1.17925	2.58351	3.49825	0	0	0	0	79.0922	0
SRR6435884	Rhizosphere	Rhizosphere	Arabidopsis thaliana	0.36	0	32.0024	0	0	11.8089	0	0	11.6805	0	5.96861	7.72242	0	0	0	0	30.8172	0
SRR6435886	Rhizosphere	Rhizosphere	Arabidopsis thaliana	0.26	0	60.3665	0	0	0	0	0	0	0	16.649	0	0	0	0	0	22.9846	0
SRR6435887	Rhizosphere	Rhizosphere	Arabidopsis thaliana	0.19	0.0637626	46.7479	0	0	15.5121	0	2.92302	13.4312	2.92302	6.71562	11.7471	0	0	0	0	0	0
SRR6435946	Rhizosphere	Rhizosphere	Arabidopsis thaliana	0.19	0.0353911	39.2791	0	4.46511	0	1.97134	0	19.4705	1.97134	8.93023	0	0	0	0	0	23.9124	0
SRR6435947	Rhizosphere	Rhizosphere	Arabidopsis thaliana	0.25	0.16351	48.3062	0	0	0	6.61762	11.2925	13.2352	2.88037	0	0	0	0	0	0	17.6681	0
SRR6435948	Rhizosphere	Rhizosphere	Arabidopsis thaliana	0.12	0	51.0905	0	0	0	0	13.2353	7.72847	0	7.72847	0	0	0	0	0	20.2173	0
SRR6435949	Rhizosphere	Rhizosphere	Arabidopsis thaliana	0.34	0	31.5869	0	0	0	0	0	3.82492	1.73664	7.64984	0	6.81465	0	0	0	48.387	0
SRR6435951	Rhizosphere	Rhizosphere	Arabidopsis thaliana	0.25	0	66.9523	0	0	2.13781	2.13781	0	0	0	10.8377	0	0	0	0	0	13.0304	4.90393
SRR6435952	Soil	Misc.	NA	0	0.0381952	0	0	0	0	0	0	0	0	0	0	0	0	0	0	0	0
SRR6435953	Soil	Misc.	NA	0.04	0	78.9178	0	0	0	0	0	0	0	21.0822	0	0	0	0	0	0	0
SRR6435954	Soil	Misc.	NA	0.03	0	89.2279	0	0	0	0	0	0	0	0	10.7721	0	0	0	0	0	0
SRR6435955	Rhizosphere	Rhizosphere	Arabidopsis thaliana	0.26	0	82.4517	0	0	0	0	0	0	0	0	0	0	0	0	0	10.0122	7.53609
SRR6435956	Rhizosphere	Rhizosphere	Arabidopsis thaliana	0.21	0	33.7558	0	0	0	0	29.7481	0	13.1324	0	0	0	0	0	0	23.3636	0
SRR6435958	Rhizosphere	Rhizosphere	Arabidopsis thaliana	0.51	0	32.1462	0	0	0	0	7.00081	6.17275	0	0	0	0	0	0	0	51.8543	2.82595
SRR6435959	Rhizosphere	Rhizosphere	Arabidopsis thaliana	0.36	0	16.3338	0	0	0	0	4.85946	2.22987	0	4.85946	0	0	0	0	0	66.8579	4.85946
SRR6435960	Rhizosphere	Rhizosphere	Arabidopsis thaliana	0.61	0	8.79336	0	0	0	2.53082	0	1.84944	0	8.33951	0	0	0	0	0	78.4869	0
SRR6435961	Rhizosphere	Rhizosphere	Arabidopsis thaliana	0.39	0.0567598	18.4705	0	0	4.93752	4.93752	0	9.87505	0	6.66211	0	0	0	0	0	55.1173	0
SRR6435962	Soil	Misc.	NA	0.1	0	22.0643	0	0	0	0	0	16.5288	0	61.4069	0	0	0	0	0	0	0
SRR6435963	Rhizosphere	Rhizosphere	Arabidopsis thaliana	0.48	0.0414188	35.6079	0	0	0	2.23846	0	1.01633	1.01633	18.2421	0	0	0	0	0	37.4019	4.47692
SRR6435964	Soil	Misc.	NA	0.1	0	64.4742	0	0	0	0	35.5258	0	0	0	0	0	0	0	0	0	0
SRR6435982	Rhizosphere	Rhizosphere	Arabidopsis thaliana	0.92	0	31.8025	0	0	0	0	3.61261	3.9428	1.22363	8.28418	0	0	0	0	0	51.1343	0
SRR6435983	Rhizosphere	Rhizosphere	Arabidopsis thaliana	0.17	0	46.6182	0	0	5.66957	0	7.28944	11.3391	0	11.3391	2.42981	0	0	0	0	9.64518	5.66957
SRR6435984	Rhizosphere	Rhizosphere	Arabidopsis thaliana	0.62	0	32.9613	0	0	16.1628	3.66381	0	8.91645	0	3.10941	9.58135	0	0	0	0	23.4617	2.14323
SRR6436009	Soil	Misc.	NA	0.14	0.0497296	19.8243	0	0	12.2223	3.801	0	25.2639	0	22.8651	3.801	0	0	0	0	12.2223	0
SRR6436014	Soil	Misc.	NA	0	0	0	0	0	0	0	0	0	0	0	0	0	0	0	0	0	0
SRR6436015	Rhizosphere	Rhizosphere	Arabidopsis thaliana	0.22	0	20.5468	0	0	0	0	9.55466	7.32636	0	14.6527	0	0	0	0	0	47.9195	0
SRR6436016	Rhizosphere	Rhizosphere	Arabidopsis thaliana	1.53	0	8.57084	0	2.29191	1.84891	0	0	0	0	4.5728	0	0	0	0	0	82.7155	0
SRR6436017	Rhizosphere	Rhizosphere	Arabidopsis thaliana	0.34	0	39.0693	0	0	0	0	0	0	0	2.95303	2.95303	0	0	0	0	37.2299	17.7947
SRR6436018	Soil	Misc.	NA	0.05	0	100	0	0	0	0	0	0	0	0	0	0	0	0	0	0	0
SRR6436019	Soil	Misc.	NA	0	0	0	0	0	0	0	0	0	0	0	0	0	0	0	0	0	0
SRR6436020	Rhizosphere	Rhizosphere	Arabidopsis thaliana	1.11	0.0484274	11.7468	0	0	1.30911	0	0	1.30911	0	1.91299	3.00391	0	0	0	0	80.7181	0
SRR6436021	Rhizosphere	Rhizosphere	Arabidopsis thaliana	0.32	0	44.7204	0	0	0	7.34298	0	0	3.31245	7.34298	0	0	0	0	0	37.2812	0
SRR6436041	Soil	Misc.	NA	0.14	0	51.2013	0	5.76861	11.5372	0	0	0	0	25.7243	5.76861	0	0	0	0	0	0
SRR6436042	Soil	Misc.	NA	0.13	0	65.8663	0	0	0	0	0	0	0	20.1795	0	0	0	0	0	13.9543	0
SRR6436043	Soil	Misc.	NA	0.12	0	41.8123	0	4.64004	0	4.64004	0	0	0	24.4538	14.0301	0	0	0	0	10.4237	0
SRR6436044	Soil	Misc.	NA	0	0.111648	0	0	0	0	0	0	0	0	0	0	0	0	0	0	0	0
SRR6436057	Soil	Misc.	NA	0.06	0.0790228	64.3533	0	0	0	0	0	0	0	0	0	0	0	0	0	35.6467	0
SRR6489859	Rhizosphere	Rhizosphere	Sorghum bicolor	0.12	0	53.6567	0	0	0.798174	0.798174	0	14.3369	0	5.35346	0.798174	0	0	0	0	22.8908	1.36767
SRR6489884	Rhizosphere	Rhizosphere	Sorghum bicolor	0.1	0	12.524	0	0	2.82595	0	0.711571	2.28055	0	3.39724	0.711571	0	0	0	0	24.4774	53.0717
SRR6490015	Rhizosphere	Rhizosphere	Sorghum bicolor	0.14	0.00730178	14.2036	0	0	0.873474	0	5.89332	3.78709	0	10.5339	0.873474	0	0	0	0	49.6506	14.1845
SRR6490096	Rhizosphere	Rhizosphere	Sorghum bicolor	0.11	0	42.7726	0	0.675698	3.66501	0	3.90769	12.2048	2.02871	13.8427	7.53272	0	0	0	0	11.4404	1.92969
SRR6956985	Rhizosphere	Rhizosphere	Maize	0.04	0.00451223	40.7167	0	1.7343	11.2597	2.93788	4.53337	8.61613	0	13.0206	0	3.27109	0	0	0	7.64899	6.26121
SRR6957156	Rhizosphere	Rhizosphere	Maize	0.18	0.00490736	51.2533	0	0.970196	7.63644	6.14698	1.94262	7.73645	0.371788	7.15575	0	0.555912	0	0	0	14.2087	2.02184
SRR6957160	Rhizosphere	Rhizosphere	Silvergrass	0.12	0.0125105	61.3502	0	0	7.34015	7.00805	9.14753	3.90695	0	3.4332	0	0	0	0	0	0	7.81391
SRR6957162	Rhizosphere	Rhizosphere	Silvergrass	0.11	0.0143708	44.3524	0	0.412108	3.5983	3.93172	2.59492	9.47989	1.25812	13.0132	1.65528	0	0	0	0	16.5179	3.18619
SRR6957165	Rhizosphere	Rhizosphere	Maize	0.08	0	20.769	0	0	3.42057	2.39269	0	5.19053	1.76996	6.07376	0	8.10216	0	0	0	48.2761	4.00525
SRR6957362	Rhizosphere	Rhizosphere	Switchgrass	0.14	0.0172095	40.4678	0	0.462029	5.97165	3.94375	22.9419	12.5036	0	9.27902	0.462029	0	0	0	0	2.09563	1.87255
SRR6957363	Rhizosphere	Rhizosphere	Switchgrass	0.08	0.0239314	41.4831	0	0	7.78807	5.42254	7.25738	7.18587	0	12.6097	6.79922	0	0	0	0	5.42931	6.02473
SRR6958124	Soil	Riparian zone	NA	0.3	0.0222355	55.6452	0	0.661313	9.12042	8.14505	5.09505	13.2843	0.339509	3.21309	0.903219	0	0	0	0	0.554733	3.03812
SRR6958471	Soil	Riparian zone	NA	0.12	0	45.8331	0	5.67288	6.10265	5.36418	8.83169	18.0686	1.19975	5.99873	0	0	0	0	0	0	2.92852
SRR6958472	Soil	Riparian zone	NA	0.19	0.0163505	48.1352	0	1.66939	4.72264	2.65088	9.29209	21.9327	0.24537	5.08233	0.24537	0	0	0	0	0.556465	5.46758
SRR6958474	Soil	Riparian zone	NA	0.09	0.00843941	44.8861	0	0.710028	7.73719	5.04825	9.25883	11.6144	5.35916	8.2853	0	0	0	0	0	4.02254	3.07819
SRR6958475	Soil	Riparian zone	NA	0.14	0.0123761	50.6871	0	0.940882	7.59633	2.32246	10.7704	11.6343	1.20063	6.3836	3.88559	0	0	0	0	0.698941	3.87973
SRR6958482	Soil	Riparian zone	NA	0.1	0.00833792	36.3384	0	1.37263	10.3214	9.4416	6.64639	12.5298	0.72939	6.40922	1.59805	0	0	0	0.981871	12.9881	0.643241
SRR6958483	Soil	Riparian zone	NA	0.12	0.0140024	49.2631	0	0.595604	9.13457	8.74106	5.9122	15.9201	0.262629	7.17479	0	0	0	0	0	2.20809	0.787886
SRR6958552	Soil	Riparian zone	NA	0.2	0.0165162	46.4256	0	1.59165	8.05822	5.7795	12.5026	17.5307	0.37045	5.3059	0	0	0	0	0	0.740901	1.69451
SRR7010302	Soil	Riparian zone	NA	0.03	0	17.9657	0	0	14.7087	12.5881	0	36.7718	0	7.35436	3.25693	0	0	0	0	0	7.35436
SRR7010303	Soil	Riparian zone	NA	0	0	0	0	0	0	0	0	0	0	0	0	0	0	0	0	0	0
SRR7010524	Soil	Riparian zone	NA	0.15	0	47.0969	0	0	10.4478	0	0	32.0075	0	10.4478	0	0	0	0	0	0	0
SRR7010525	Soil	Riparian zone	NA	0.09	0.0292409	33.1863	0	0	0	0	0	55.9094	0	0	0	0	0	0	0	0	10.9043
SRR7010528	Soil	Riparian zone	NA	0.08	0.0486112	51.9217	0	0	0	2.71829	8.23981	20.0411	2.71829	14.3608	0	0	0	0	0	0	0
SRR7013836	Soil	Misc.	NA	0.42	0.0475979	52.5391	0	0	4.47496	3.39992	9.04945	20.0939	0	10.4427	0	0	0	0	0	0	0
SRR7013837	Soil	Misc.	NA	0.24	0.0610902	43.3128	0	0	8.01214	2.27937	9.33541	13.7944	2.48289	13.8234	0	3.15338	0	0	0	3.04637	0.759791
SRR7013838	Soil	Misc.	NA	0.25	0.0415464	41.8448	0	0	9.67412	0	28.3828	11.5822	0.672719	1.52563	1.52563	2.77388	0	0	0	0	2.01816
SRR7013839	Soil	Misc.	NA	0.36	0	47.4411	0	0	20.2574	2.63649	11.6116	9.27766	0	7.24094	0	0	0	0	0	0	1.53482
SRR7013840	Soil	Misc.	NA	0.47	0	49.0465	0	0	9.64514	4.33322	16.9805	9.09195	1.91034	4.89638	0	0	0	0	0	1.4242	2.67177
SRR7013841	Soil	Misc.	NA	0.18	0.0116852	39.9388	0	2.07779	8.62504	11.2505	15.6888	9.23317	0	13.186	0	0	0	0	0	0	0
SRR7013842	Soil	Misc.	NA	0.37	0	51.0598	0	0	6.67506	0.787869	14.234	16.7682	3.01216	4.11977	0	0	0	0	0	0	3.34316
SRR7013843	Soil	Misc.	NA	0.22	0	51.6043	0	0	3.86752	5.92188	5.33133	8.88283	2.76549	9.63972	7.47393	0	0	0	0	0	4.51299
SRR7013844	Soil	Misc.	NA	0.34	0	56.6586	0	0	13.1654	2.12719	2.98195	16.8764	4.28895	2.2703	0	0	0	0	0	0	1.63117
SRR7013845	Soil	Misc.	NA	0.23	0.0436741	67.3982	0	0	5.18216	0	7.6235	9.43179	0	6.37445	2.12482	0	0	0	0	0	1.86504
SRR7013846	Soil	Misc.	NA	0.29	0.0491383	43.6835	0	3.67914	12.7175	1.85114	15.2964	10.0094	4.60471	6.30709	0	0	0	0	0	0.925569	0.925569
SRR7013847	Soil	Misc.	NA	0.18	0.0158727	44.3943	0	0	3.4187	0	11.925	15.565	1.50477	4.59388	0	0	0	0	0	6.83741	11.7609
SRR7013848	Soil	Misc.	NA	0.18	0.0212282	56.2545	0	0	12.981	4.02095	0.755713	10.0807	0	10.5115	0	0	0	0	0	3.6818	1.71385
SRR7013849	Soil	Misc.	NA	0.36	0	55.2717	0	0	6.0352	3.94775	8.24718	18.103	0	2.8539	0	0	0	0	0	3.4841	2.05715
SRR7013850	Soil	Misc.	NA	0.28	0.0144642	48.1988	0	0	9.18298	3.378	12.247	15.5209	0	8.10631	3.36596	0	0	0	0	0	0
SRR7013851	Soil	Misc.	NA	0.39	0	48.6699	0	1.38839	7.66078	0.610015	11.0203	18.0179	1.22003	8.80424	0	0	0	0	0	0	2.60842
SRR7013852	Soil	Misc.	NA	0.12	0.052112	50.6125	0	0	12.6089	8.90276	0	16.492	0	11.3839	0	0	0	0	0	0	0
SRR7013853	Soil	Misc.	NA	0.23	0.0338885	44.4802	0	0	10.3127	2.23275	26.0764	4.11996	0	6.39208	1.68786	3.01019	0	0	0	1.68786	0
SRR7013854	Soil	Misc.	NA	0.55	0.0183108	42.9937	0	0	12.9793	2.71795	16.1602	17.9042	0	1.20975	2.17134	0	0	0	0	2.11706	1.74656
SRR7013855	Soil	Misc.	NA	0.59	0	43.9137	0	2.43842	15.87	3.7396	12.077	10.5852	0	7.87962	0.498138	0	0	0	0	1.50395	1.49441
SRR7013858	Soil	Agricultural soil	NA	0	0.0546419	0	0	0	0	0	0	0	0	0	0	0	0	0	0	0	0
SRR7013859	Soil	Agricultural soil	NA	0.19	0.0415964	55.0935	0	0	8.62377	2.22337	2.22337	11.7305	0	13.4144	6.69117	0	0	0	0	0	0
SRR7013860	Soil	Agricultural soil	NA	0.31	0.0773899	26.358	0	3.85754	15.0046	7.4959	13.14	18.651	0	11.1343	4.35861	0	0	0	0	0	0
SRR7013861	Soil	Agricultural soil	NA	0.24	0.0282773	31.5438	0	1.51835	8.36179	0	36.839	3.42172	0	14.8936	0	0	0	0	0	0	3.42172
SRR7013862	Soil	Agricultural soil	NA	0.48	0.0956094	19.9964	0	1.89414	24.7924	0	11.4813	13.3432	4.17376	14.0772	0	0	0	0	0	8.34751	1.89414
SRR7013863	Soil	Agricultural soil	NA	0.15	0.0476935	60.655	0	0	16.8209	2.64893	7.79419	0	0	0	0	0	0	0	0	6.0405	6.0405
SRR7013864	Soil	Agricultural soil	NA	0.33	0	31.4228	0	0	18.499	0	21.4187	13.5999	0	9.48456	0	0	0	0	0	0	5.57515
SRR7013865	Soil	Agricultural soil	NA	0.27	0.134475	55.8445	0	0	0	0	11.5638	8.01789	0	22.8009	0	0	0	0	0	0	1.77294
SRR7013866	Soil	Agricultural soil	NA	0.28	0.132455	23.7199	0	0	11.2414	0	48.7287	7.49428	0	8.81573	0	0	0	0	0	0	0
SRR7013867	Soil	Agricultural soil	NA	0.11	0.0772992	59.761	0	0	6.79418	13.5884	6.79418	3.13406	0	3.13406	0	0	0	0	0	0	6.79418
SRR7013868	Soil	Agricultural soil	NA	0.25	0.0723772	25.4282	0	0	10.4894	4.90845	39.9768	8.03519	0	5.58096	0	5.58096	0	0	0	0	0
SRR7013869	Soil	Agricultural soil	NA	0.4	0.0477942	50.747	0	0	12.9	1.81889	0	4.03844	0	21.3898	0	0	0	0	0	0	9.10591
SRR7013870	Soil	Agricultural soil	NA	0.17	0	51.5732	0	0	7.95713	7.95713	0	7.95713	0	2.42437	0	0	0	0	0	11.0655	11.0655
SRR7013871	Soil	Agricultural soil	NA	0.32	0.0631189	56.5521	0	0	14.7554	1.41699	2.83398	8.99205	0	7.57506	0	0	0	0	0	3.22872	4.64571
SRR7013872	Soil	Agricultural soil	NA	0.21	0.0790202	31.0044	0	0	5.79758	0	54.7957	0	0	8.40229	0	0	0	0	0	0	0
SRR7013873	Soil	Agricultural soil	NA	0.37	0	30.0249	0	0	20.1477	3.76037	15.3802	20.6276	0	8.37743	0	0	0	0	0	1.6818	0
SRR7013874	Soil	Agricultural soil	NA	0.21	0	44.2849	0	0	10.1537	4.96417	6.92449	13.9579	0	12.3395	3.68767	0	0	0	0	0	3.68767
SRR7013875	Soil	Agricultural soil	NA	0.19	0.0433925	24.516	0	0	12.87	14.2613	12.87	23.8465	0	9.5852	0	0	0	0	0	0	2.05094
SRR7013876	Soil	Agricultural soil	NA	0.19	0	20.1118	0	0	3.82887	11.5694	27.1275	21.0793	0	12.4541	0	0	0	0	0	3.82887	0
SRR7013877	Soil	Agricultural soil	NA	0.24	0.0400718	30.8109	0	0	8.94579	0	24.8718	9.50724	0	4.75362	4.75362	0	0	0	0	9.50724	6.84971
SRR7013878	Soil	Agricultural soil	NA	0.31	0.170817	30.8741	0	0	7.94654	3.83967	29.189	2.64885	0	13.2442	8.41793	0	0	0	0	0	3.83967
SRR7013879	Soil	Agricultural soil	NA	0.24	0	31.2673	0	0	18.5734	4.8812	22.3071	9.7624	0	4.39768	8.81096	0	0	0	0	0	0
SRR7013880	Soil	Agricultural soil	NA	0.27	0.0355475	24.2937	0	0	9.84018	0	28.0854	17.6126	1.56994	3.52251	4.50817	0	0	0	0	0	10.5675
SRR7013881	Soil	Agricultural soil	NA	0.14	0.0297302	27.5378	0	0	12.5947	0	21.6097	4.19825	0	0	0	7.15494	0	0	0	14.3099	12.5947
SRR7013882	Soil	Agricultural soil	NA	0.1	0.0884437	39.9304	0	0	10.673	16.4573	3.25082	22.2664	0	0	0	0	0	0	0	0	7.42213
SRR7013883	Soil	Agricultural soil	NA	0.1	0.0621244	40.878	0	0	18.9695	4.38582	1.93736	8.77164	0	9.96289	4.38582	0	0	0	0	6.32318	4.38582
SRR7013884	Soil	Agricultural soil	NA	0.22	0.0293569	57.2679	0	0	7.57353	0	23.4927	2.30103	0	7.06388	0	0	0	0	0	2.30103	0
SRR7013885	Soil	Agricultural soil	NA	0.12	0	18.2579	0	0	0	0	39.5434	27.414	8.4701	6.31463	0	0	0	0	0	0	0
SRR7013886	Soil	Agricultural soil	NA	0.1	0.0652817	29.5533	0	0	5.12821	5.80226	39.5454	5.80226	0	8.36636	0	0	0	0	0	5.80226	0
SRR7013887	Soil	Agricultural soil	NA	0.27	0.0363973	20.7249	0	0	12.5419	1.93622	31.9286	8.36126	0	20.3265	0	0	0	0	0	0	4.18063
SRR7013888	Soil	Agricultural soil	NA	0.25	0.091084	37.5926	0	8.24594	0	2.78544	12.0947	36.4959	0	0	0	0	0	0	0	0	2.78544
SRR7013889	Soil	Agricultural soil	NA	0.09	0	44.9081	0	0	7.87027	7.87027	7.87027	31.4811	0	0	0	0	0	0	0	0	0
SRR7013890	Soil	Agricultural soil	NA	0.15	0.096616	30.3815	0	0	18.5635	1.50442	21.1545	6.82364	0	3.41182	0	0	0	0	0	3.41182	14.7487
SRR7013891	Soil	Agricultural soil	NA	0.11	0.155585	39.0749	0	0	0	0	30.6272	7.57447	0	15.1489	0	7.57447	0	0	0	0	0
SRR7013892	Soil	Agricultural soil	NA	0.28	0.0825363	46.7665	0	1.52824	3.43991	3.05648	18.3738	4.96815	0	18.8105	1.52824	0	0	0	0	0	1.52824
SRR7013893	Soil	Agricultural soil	NA	0.46	0	59.9904	0	0	10.569	3.37147	1.68573	7.75013	0	7.75013	0	0	0	0	0	1.68573	7.19748
SRR7013894	Soil	Agricultural soil	NA	0.05	0.037513	60.9561	0	0	7.39165	0	0	14.7833	0	13.5477	3.32123	0	0	0	0	0	0
SRR7013896	Soil	Agricultural soil	NA	0.24	0.0709211	18.6131	0	0	5.32419	0	45.8769	5.32419	0	13.8105	0	0	0	0	0	0	11.0511
SRR7013897	Soil	Agricultural soil	NA	0.07	0.0626554	44.0324	0	3.61808	7.23617	3.61808	18.9726	14.4044	0	8.11832	0	0	0	0	0	0	0
SRR7013898	Soil	Agricultural soil	NA	0.17	0	32.3879	0	0	4.50568	10.9833	26.3882	9.01136	0	4.50568	0	0	0	0	0	0	12.2179
SRR7013899	Soil	Agricultural soil	NA	0.14	0.0723942	42.5416	0	0	0	0	32.2632	17.8668	0	7.32848	0	0	0	0	0	0	0
SRR7013900	Soil	Agricultural soil	NA	0.26	0.0615361	28.9459	0	0	32.1391	1.38074	1.38074	14.9566	0	10.7413	10.4556	0	0	0	0	0	0
SRR7013901	Soil	Agricultural soil	NA	0.37	0.105465	53.1981	0	0	11.9114	3.13259	8.69601	10.0164	0	6.348	0	0	0	0	0	0	6.69745
SRR7013902	Soil	Agricultural soil	NA	0.29	0	49.3568	0	1.70602	10.6384	0	9.22013	13.154	0	9.22013	0	0	0	6.70446	0	0	0
SRR7013903	Soil	Agricultural soil	NA	0.14	0	59.7241	0	0	9.93154	0	3.26861	10.607	0	9.93154	3.26861	0	0	0	0	0	3.26861
SRR7013904	Soil	Agricultural soil	NA	0.23	0.0894294	20.3994	0	0	4.25534	4.25534	51.143	8.51069	0	0	0	0	0	0	0	0	11.4362
SRR7013905	Soil	Agricultural soil	NA	0.32	0	25.7065	0	0	15.1703	3.40541	33.1048	9.60377	0	3.40541	1.54866	0	0	0	0	0	8.05511
SRR7013906	Soil	Agricultural soil	NA	0.3	0	56.5736	0	0	5.39286	0	20.0121	12.6286	0	5.39286	0	0	0	0	0	0	0
SRR7013907	Soil	Agricultural soil	NA	0.21	0.0603974	38.2615	0	0	10.5782	0	14.6037	14.4926	0	15.1692	5.535	0	0	0	0	0	1.35978
SRR7013908	Soil	Agricultural soil	NA	0.25	0	34.4151	0	3.28865	7.48492	3.28865	3.28865	24.9617	0	13.2805	0	0	0	0	0	9.99183	0
SRR7013909	Soil	Agricultural soil	NA	0.09	0.0756204	45.5016	0	5.90411	11.8082	0	5.26785	8.53803	0	17.7123	0	0	0	0	0	2.63392	2.63392
SRR7013910	Soil	Agricultural soil	NA	0.34	0	43.9848	0	0	30.2409	1.44437	14.5185	6.54093	0	0	3.27047	0	0	0	0	0	0
SRR7013911	Soil	Agricultural soil	NA	0.26	0	35.5634	0	0	17.9383	3.48579	14.2134	13.2851	0	6.97158	0	0	0	0	0	3.48579	5.05662
SRR7013912	Soil	Agricultural soil	NA	0.47	0.0825825	40.8866	0	0	20.8198	1.22341	20.1211	9.2787	0	2.78825	1.22341	0	0	0	0	3.65876	0
SRR7013913	Soil	Agricultural soil	NA	0.31	0	33.6453	0	0	19.681	0	15.3885	8.27366	0	7.09412	14.3505	0	0	0	0	1.56685	0
SRR7013914	Soil	Agricultural soil	NA	0.19	0.0409045	41.4728	0	0	21.203	0	0	8.06063	0	11.181	18.0826	0	0	0	0	0	0
SRR7013915	Soil	Agricultural soil	NA	0.37	0.0442538	39.3943	0	0	11.4968	3.59579	6.44528	9.8829	0	5.28697	0	3.59579	0	0	0	18.6883	1.61386
SRR7013916	Soil	Agricultural soil	NA	0.48	0.0468687	47.6946	0	2.10898	6.8364	2.10898	6.36731	8.94538	0	11.0947	0	0	0	0	0	12.7346	2.10898
SRR7013917	Soil	Agricultural soil	NA	0.43	0.0490105	49.9175	0	0	1.98812	0	1.98812	5.92704	0	0	23.9329	0	0	0	0	0	16.2463
SRR7013918	Soil	Agricultural soil	NA	0.15	0	38.466	0	0	16.5619	0	23.6496	5.33062	0	5.33062	0	0	0	0	0	5.33062	5.33062
SRR7013919	Soil	Agricultural soil	NA	0.42	0	45.9892	0	0	19.224	4.31502	17.5268	8.63003	0	4.31502	0	0	0	0	0	0	0
SRR7013920	Soil	Agricultural soil	NA	0.26	0.0616766	30.7443	0	1.79613	21.6672	4.00479	1.79613	13.3305	5.32092	21.3401	0	0	0	0	0	0	0
SRR7013921	Soil	Agricultural soil	NA	0.17	0	53.0156	0	0	3.67803	14.3962	0	8.4107	0	8.4107	0	0	0	0	0	0	12.0887
SRR7013922	Soil	Agricultural soil	NA	0.32	0.114047	30.5194	0	2.07759	4.15519	10.4579	28.2357	4.69879	0	10.4579	4.69879	0	0	0	0	0	4.69879
SRR7013923	Soil	Agricultural soil	NA	0.23	0.037541	18.8268	0	0	9.96901	0	30.8538	27.137	0	13.2134	0	0	0	0	0	0	0
SRR7013924	Soil	Agricultural soil	NA	0.23	0	25.0514	0	2.42637	20.864	2.42637	30.2514	5.51803	0	0	0	0	0	0	0	0	13.4624
SRR7013925	Soil	Agricultural soil	NA	0.25	0.16418	42.481	0	0	5.31677	0	10.0806	19.385	0	9.7212	5.31677	0	0	0	0	5.31677	2.38191
SRR7013926	Soil	Agricultural soil	NA	0.33	0.0360219	21.9919	0	3.3908	14.0911	6.7816	21.6416	10.1724	0	11.3461	0	4.49964	0	0	0	4.56454	1.52029
SRR7013927	Soil	Agricultural soil	NA	0.28	0.0954579	26.1101	0	2.17391	4.78723	0	46.8982	4.78723	0	0	0	0	0	0	0	8.28221	6.96115
SRR7013928	Soil	Agricultural soil	NA	0.19	0.031737	33.5852	0	0	10.4218	0	29.1141	3.01772	0	20.8435	0	0	0	0	0	0	3.01772
SRR7013929	Soil	Agricultural soil	NA	0.12	0.0402999	51.0712	0	2.7223	12.2358	6.1179	2.7223	0	0	10.1724	6.1179	0	0	0	6.1179	0	2.7223
SRR7091408	Rhizosphere	Rhizosphere	Vellozia epidendroides	0.12	0.0959719	15.8679	0	0	6.00283	2.37149	5.07873	12.0147	0	21.6489	9.63418	0	0	0	0	14.6257	12.7556
SRR7091409	Rhizosphere	Rhizosphere	Vellozia epidendroides	0.16	0.0149838	9.92564	0	0	3.46907	2.25928	7.9371	4.9546	0	53.9042	6.98833	0	0	0	0	0	10.5618
SRR7091410	Rhizosphere	Rhizosphere	Vellozia epidendroides	0.1	0.0488359	22.0052	0	0	21.5898	7.19741	9.97927	11.587	0	5.18056	10.6851	3.18873	0	0	0	3.18873	5.39806
SRR7186477	Rhizosphere	Rhizosphere	Foxtail millet	0.14	0.0237897	44.9489	0	0.680205	7.94195	7.34923	5.09504	12.3231	0.680205	15.4237	2.35371	0	0	0	0	0.680205	2.52376
SRR7186478	Rhizosphere	Rhizosphere	Foxtail millet	0.19	0.0461824	44.6214	0	0	4.59155	5.28923	4.63177	20.7314	0	15.3302	2.04653	0	0	0	0	1.10316	1.65474
SRR7186479	Rhizosphere	Rhizosphere	Foxtail millet	0.19	0.0553658	37.3197	0	2.67296	8.48201	8.64632	5.88871	16.2358	0	16.1582	2.53064	0	0	0	0	0.649866	1.41578
SRR7186480	Rhizosphere	Rhizosphere	Foxtail millet	0.19	0.0656376	41.4717	0	0.449835	7.17627	5.79245	2.71472	16.2829	0.224917	18.9816	2.52291	0.510081	0	0	0	1.66763	2.20499
SRR7186482	Rhizosphere	Rhizosphere	Foxtail millet	0.26	0.0565242	35.6501	0	0.209457	9.16193	3.63183	6.13165	17.7799	0	21.3003	2.58455	0	0	0	0	1.28744	2.26288
SRR7186497	Rhizosphere	Rhizosphere	Foxtail millet	0.18	0.0188728	43.9069	0	0.298146	5.9749	8.81104	6.47512	15.9788	0	12.7937	2.92532	0	0	0	0	0.676153	2.15999
SRR7186503	Rhizosphere	Rhizosphere	Foxtail millet	0.15	0.0242812	37.3717	0	0.644011	10.4971	4.68334	4.45921	17.7829	0	16.8393	3.11155	0.285774	0	0	0	1.93203	2.39307
SRR7186504	Rhizosphere	Rhizosphere	Foxtail millet	0.18	0.0520165	40.1804	0	1.18598	6.29211	6.61982	7.08275	12.1409	0.492111	18.6094	1.77897	0	0	0	0	3.64076	1.97679
SRR7186521	Rhizosphere	Rhizosphere	Foxtail millet	0.15	0.0190274	37.8705	0	1.18169	9.12459	7.48802	6.89718	13.5216	0.784062	15.8454	1.79576	0	0	0	0	3.63186	1.85932
SRR7186522	Rhizosphere	Rhizosphere	Foxtail millet	0.18	0.0226117	41.9392	0	0	5.15983	12.7596	7.97576	10.0006	0.861891	15.3817	0.597216	1.3544	0	0	0	0.861891	3.10781
SRR7186523	Rhizosphere	Rhizosphere	Foxtail millet	0.25	0.0522809	43.2459	0	1.11901	7.00455	5.95206	3.98336	13.374	0.212422	14.6621	1.70751	0	0	0	0	1.60889	7.13022
SRR7186524	Rhizosphere	Rhizosphere	Foxtail millet	0.22	0.0278411	46.6675	0	0.258612	5.34209	8.19246	7.02319	12.2531	0.258612	11.5007	1.87469	0	0	0	0	1.17299	5.4561
SRR7186525	Rhizosphere	Rhizosphere	Foxtail millet	0.2	0.0161801	49.3331	0	1.16026	6.94647	6.71712	5.15515	12.1643	0.616542	14.5307	0	0.616542	0	0	0	0.616542	2.1433
SRR7186526	Rhizosphere	Rhizosphere	Foxtail millet	0.22	0.0514095	43.7981	0	1.24281	4.47704	3.94776	4.65614	12.0704	1.08327	15.8919	3.14294	0	0	0	0	3.91268	5.77689
SRR7591305	Rhizosphere	Rhizosphere	Spruce	0	0	0	0	0	0	0	0	0	0	0	0	0	0	0	0	0	0
SRR7591449	Rhizosphere	Rhizosphere	Spruce	0.18	0	0	0	9.24261	81.5148	0	0	0	0	0	0	0	0	0	0	9.24261	0
SRR7591450	Rhizosphere	Rhizosphere	Spruce	0.14	0	7.70398	0	0	45.1401	0	0	0	0	0	0	0	0	0	0	29.7322	17.4237
SRR7591534	Rhizosphere	Rhizosphere	Spruce	0.08	0	12.8641	0	0	58.9802	8.85954	0	6.43206	0	0	0	0	0	0	0	0	12.8641
SRR7591549	Rhizosphere	Rhizosphere	Spruce	0.08	0	16.6995	0	0	58.2514	8.34973	0	8.34973	0	8.34973	0	0	0	0	0	0	0
SRR7975588	Rhizosphere	Rhizosphere	Silvergrass	0.18	0.0072665	38.9695	0	0.30863	8.59637	11.7539	14.7639	9.91385	0	10.4936	2.50168	0.30863	0	0	0	2.39	0
SRR7975607	Rhizosphere	Rhizosphere	Silvergrass	0.17	0.0116252	45.0694	0	0.69712	10.2111	9.57501	16.6713	9.28761	0.942964	4.49011	0.942964	0	0	0	0	0.307391	1.80499
SRR7975608	Rhizosphere	Rhizosphere	Maize	0.27	0.0122523	10.922	0	0.232348	1.49155	0.634931	0.729635	1.27351	0.232348	1.20314	0.0585775	0.235832	0	0	0	25.0673	57.9189
SRR7975684	Rhizosphere	Rhizosphere	Maize	0.08	0.00188353	22.7259	0	0.808792	0.808792	1.17737	2.15883	6.47034	0.36858	3.60375	2.59904	9.70315	0	0	0	38.9371	10.6383
SRR7975950	Rhizosphere	Rhizosphere	Silvergrass	0.18	0.0307145	45.0331	0	0	8.92279	5.30817	8.7271	12.3999	0	8.88707	4.28712	0	0	0	0	6.00501	0.429732
SRR7975952	Rhizosphere	Rhizosphere	Switchgrass	0.13	0.0158947	34.0193	0	0.956046	3.0059	4.80742	7.28066	2.86814	2.58316	5.20297	3.98298	0.956046	0	0	0	4.04915	30.2882
SRR7975954	Rhizosphere	Rhizosphere	Switchgrass	0.18	0	49.7521	0	1.19763	4.53536	2.52873	7.29727	7.56498	0.929891	5.69299	3.48725	0	0	0	0	16.0839	0.929891
SRR7975957	Rhizosphere	Rhizosphere	Switchgrass	0.16	0.0144257	36.5401	0	0	6.90469	1.84138	15.0723	17.8196	1.06522	10.5914	4.29138	0	0	0	0	3.31741	2.55657
SRR7976076	Soil	Riparian zone	NA	0.51	0.0211724	48.913	0	0.169813	12.801	6.63521	3.51471	20.755	0.169813	2.40429	0.507841	0	0	0	0	1.22779	2.90157
SRR7976077	Soil	Riparian zone	NA	0.28	0.00751858	42.6016	0	0	19.2999	13.4371	7.72694	5.74123	1.72164	5.48742	0	0	0	0	1.03559	1.54743	1.40121
SRR7976078	Soil	Riparian zone	NA	0.17	0.0141176	37.1139	0	1.20142	13.1466	9.14803	10.7499	12.4571	0.217031	9.2848	0.868126	0	0	0	0	3.79012	2.02289
SRR7976139	Soil	Riparian zone	NA	0.38	0.0238696	49.2021	0	0.116091	5.38868	4.24183	9.10518	28.4507	0.116091	0.882858	0	0	0	0	0	0.354414	2.14204
SRR8527069	Soil	Agricultural soil	NA	0	0	0	0	0	0	0	0	0	0	0	0	0	0	0	0	0	0
SRR8527070	Soil	Agricultural soil	NA	0	0	0	0	0	0	0	0	0	0	0	0	0	0	0	0	0	0
SRR8527071	Soil	Agricultural soil	NA	0	0	0	0	0	0	0	0	0	0	0	0	0	0	0	0	0	0
SRR8527072	Soil	Agricultural soil	NA	0	0	0	0	0	0	0	0	0	0	0	0	0	0	0	0	0	0
SRR8527073	Soil	Agricultural soil	NA	0	0	0	0	0	0	0	0	0	0	0	0	0	0	0	0	0	0
SRR8527074	Soil	Agricultural soil	NA	0	0	0	0	0	0	0	0	0	0	0	0	0	0	0	0	0	0
SRR8527075	Soil	Agricultural soil	NA	0	0	0	0	0	0	0	0	0	0	0	0	0	0	0	0	0	0
SRR8527076	Soil	Agricultural soil	NA	0	0	0	0	0	0	0	0	0	0	0	0	0	0	0	0	0	0
SRR8527077	Soil	Agricultural soil	NA	0	0	0	0	0	0	0	0	0	0	0	0	0	0	0	0	0	0
SRR908208	Rhizosphere	Rhizosphere	Cucumber	0.22	0	38.7984	0	0	13.8316	5.70246	3.66939	7.50893	2.7097	13.4565	0	0	0	0	0	9.59845	4.72467
SRR908211	Rhizosphere	Rhizosphere	Cucumber	0.06	0	41.6413	0	0	0	0	0	35.0152	0	11.6717	0	0	0	0	0	11.6717	0
SRR908272	Rhizosphere	Rhizosphere	Cucumber	0.12	0	40.1911	0	3.38166	1.50237	6.76332	9.20202	0	1.50237	21.7923	4.53559	0	0	0	0	3.38166	7.74758
SRR908273	Rhizosphere	Rhizosphere	Wheat	0.38	0	58.3952	0	7.96568	7.51437	10.9714	1.50287	0	1.50287	6.7696	0	0	0	0	0	3.00575	2.37224
SRR908275	Rhizosphere	Rhizosphere	Wheat	0.73	0	46.1812	0	0	4.1782	0	13.6877	13.6877	12.7556	9.50953	0	0	0	0	0	0	0
SRR908276	Rhizosphere	Rhizosphere	Wheat	0.2	0	49.8345	0	5.18755	4.59936	8.23143	7.48723	14.5079	0	5.18755	0	0	0	0	0	0	4.96445
SRR908279	Soil	Agricultural soil	NA	0.16	0.0418845	32.4124	0	0	12.6326	9.28092	6.70899	13.8599	0.478812	16.8854	3.01945	1.36343	0	0	0	0	3.35818
SRR908281	Soil	Agricultural soil	NA	0.17	0.01193	52.3297	0	0.567341	8.24942	4.81538	2.19671	7.49972	0	14.6445	0	1.27301	0	0	0	3.85927	4.56494
SRR908290	Soil	Agricultural soil	NA	0.28	0.0196731	46.359	0	0	12.275	5.61586	1.79771	9.05091	0	15.3231	0.898855	2.02044	0	0	0	0	6.6591
SRR908291	Soil	Agricultural soil	NA	0.24	0.0370329	47.0386	0	3.87259	8.54224	8.65553	2.11802	9.40601	0	17.5653	0	0	0	0	0	0.93393	1.86786
