# Supplementary material for: Global landscape of phenazine biosynthesis and biodegradation reveals species-specific colonization patterns in agricultural soils and crop microbiomes
Source: eLife journal article supplement (doi:10.7554/elife.59726), 2020-09-15
Supplement: supp [file elife-59726-supp-v1.zip › elife_poa_e59726_Supplementary_file_5.xlsx]

## Sheet: Table S5 - Oligos used
Deletion constructed	Oligo name	Oligo sequence
Dyella_ΔphzA	upstream Flank Reverse	acgaattcgagctcggtacccGCCAGGCCGTCTGTTGCCGCCTCACGGTCG
Dyella_ΔphzA	upstream Flank forward	GCATTGATGAGAGGAGGTCCCGAGCCCGCCGGCAGGGCCGCAAGGGGTCCTGAGC
Dyella_ΔphzA	downstream Flank Reverse	GCGGCCCTGCCGGCGGGCTCGGGACCTCCTCTCATCAATGCATCTACTTCCGAAAAAGAATCCTTCTCC
Dyella_ΔphzA	downstream Flank forward	aggtcgactctagaggatccccCCTTATGCCGTGGCGGATGTGTTCACCGAGAACCCG
Dyella_ΔphzT	upstream Flank Reverse	cgaattcgagctcggtacccAACAGCGTGTTCAGCAACCTGGCGCCGGCGATCGAGACGC
Dyella_ΔphzT	upstream Flank forward	AGGCGGCTAGCCCTGCCGCGATCGATGGCGTAATTAGATAATCGCCGCGGCCTGCATTTTATTCGG
Dyella_ΔphzT	downstream Flank Reverse	CGGCGATTATCTAATTACGCCATCGATCGCGGCAGGGCTAGCCGCCTTTCAGCC
Dyella_ΔphzT	downstream Flank forward	aggtcgactctagaggatccccGCTGCGCCTGACCATCGGCGCATCCGATTTC
