# Supplementary figures and images for: Global landscape of phenazine biosynthesis and biodegradation reveals species-specific colonization patterns in agricultural soils and crop microbiomes
Source: eLife journal article supplement (doi:10.7554/elife.59726), 2020-09-15

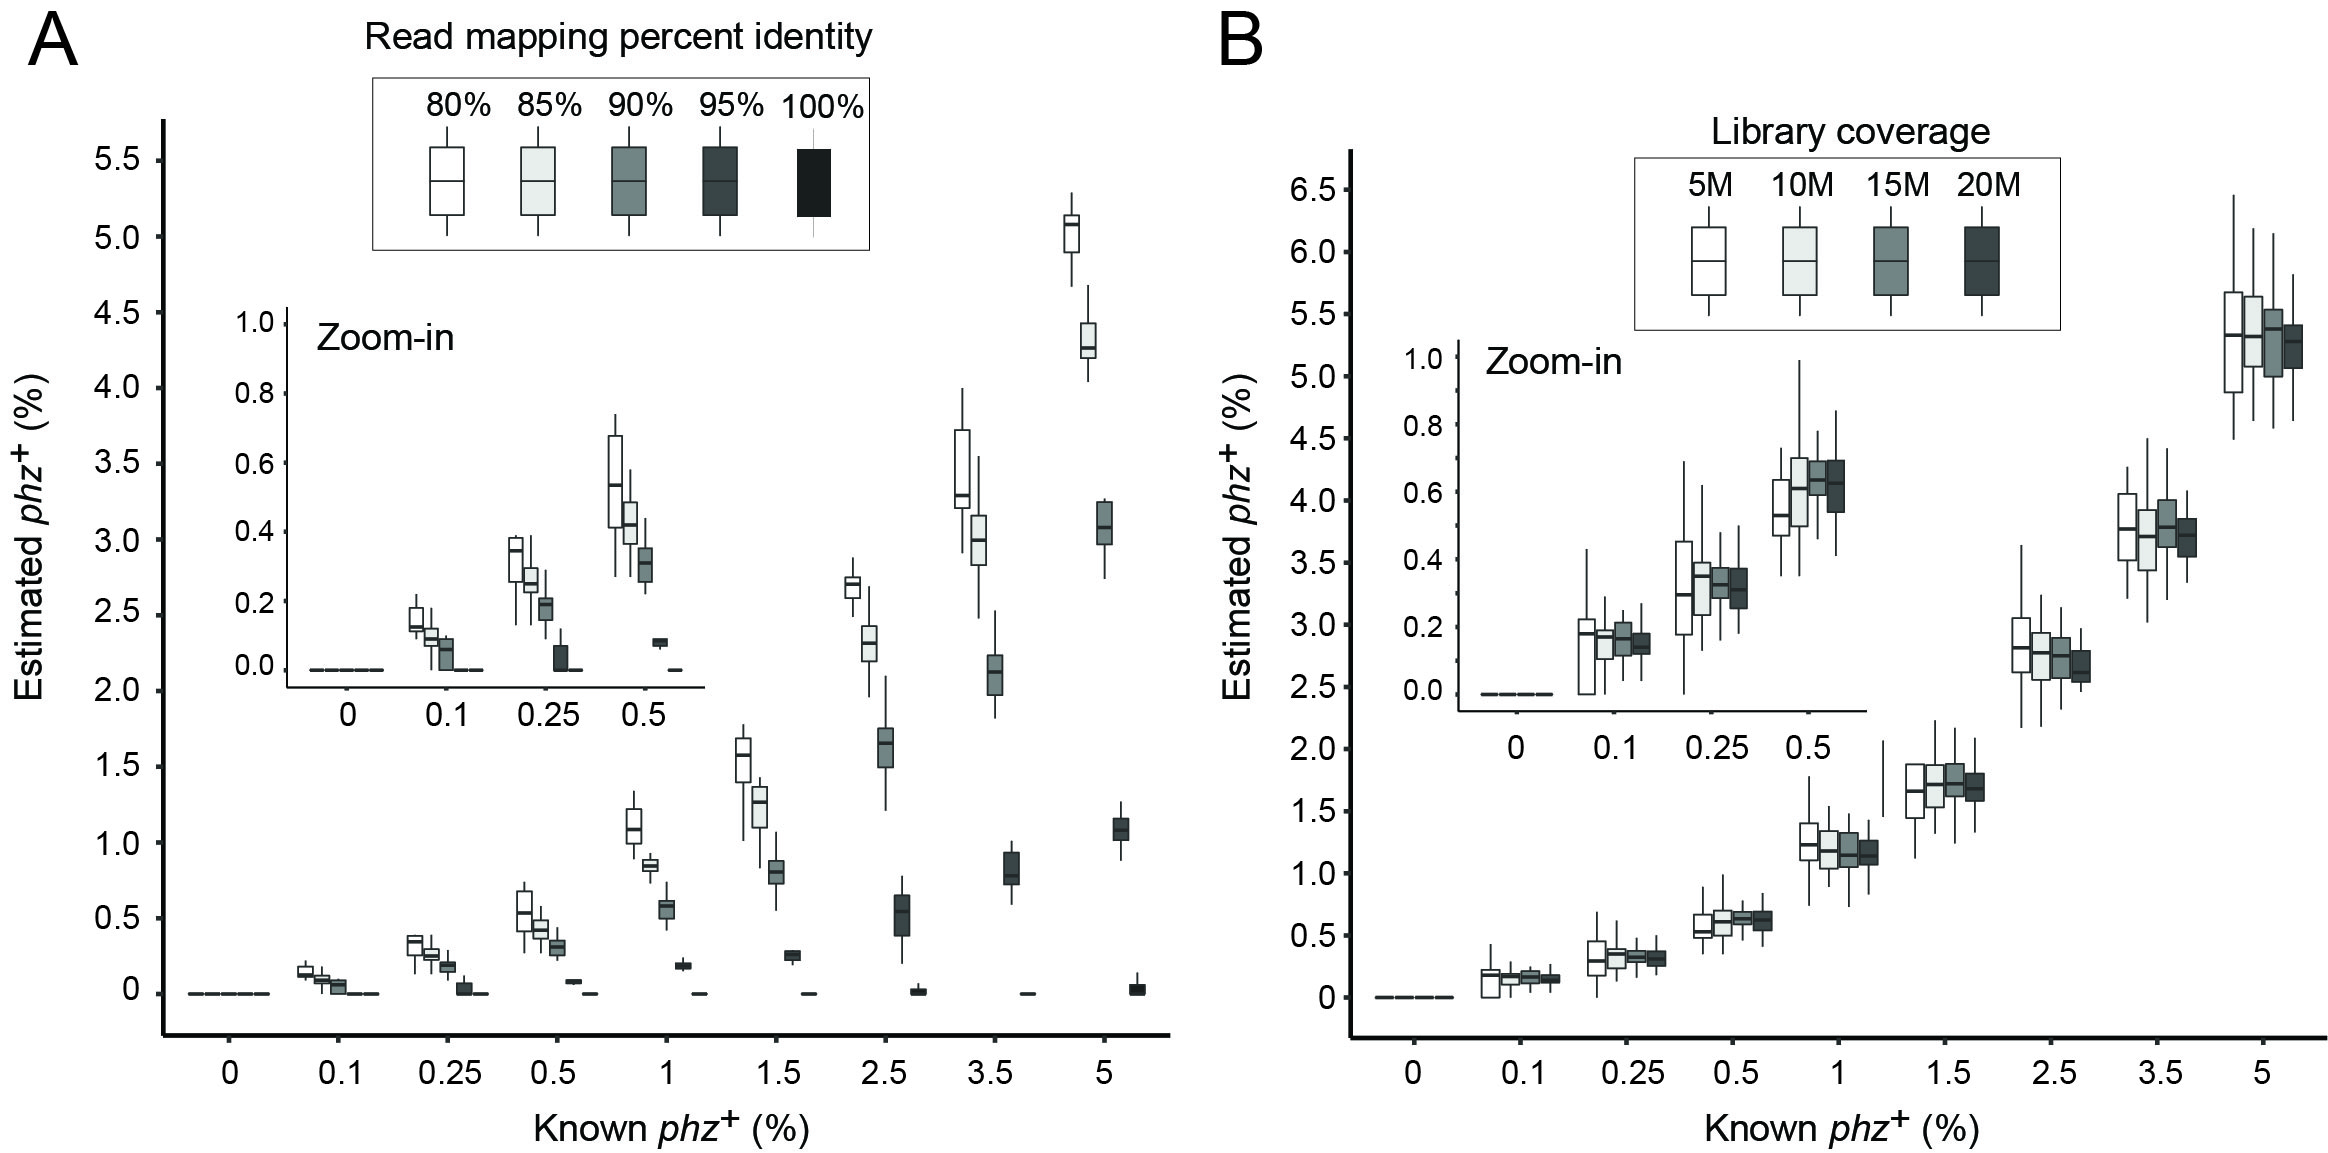

Supplement: supp [file elife-59726-supp-v1.zip › elife_poa_e59726_Figure_2_figure_supplement_1.jpg]

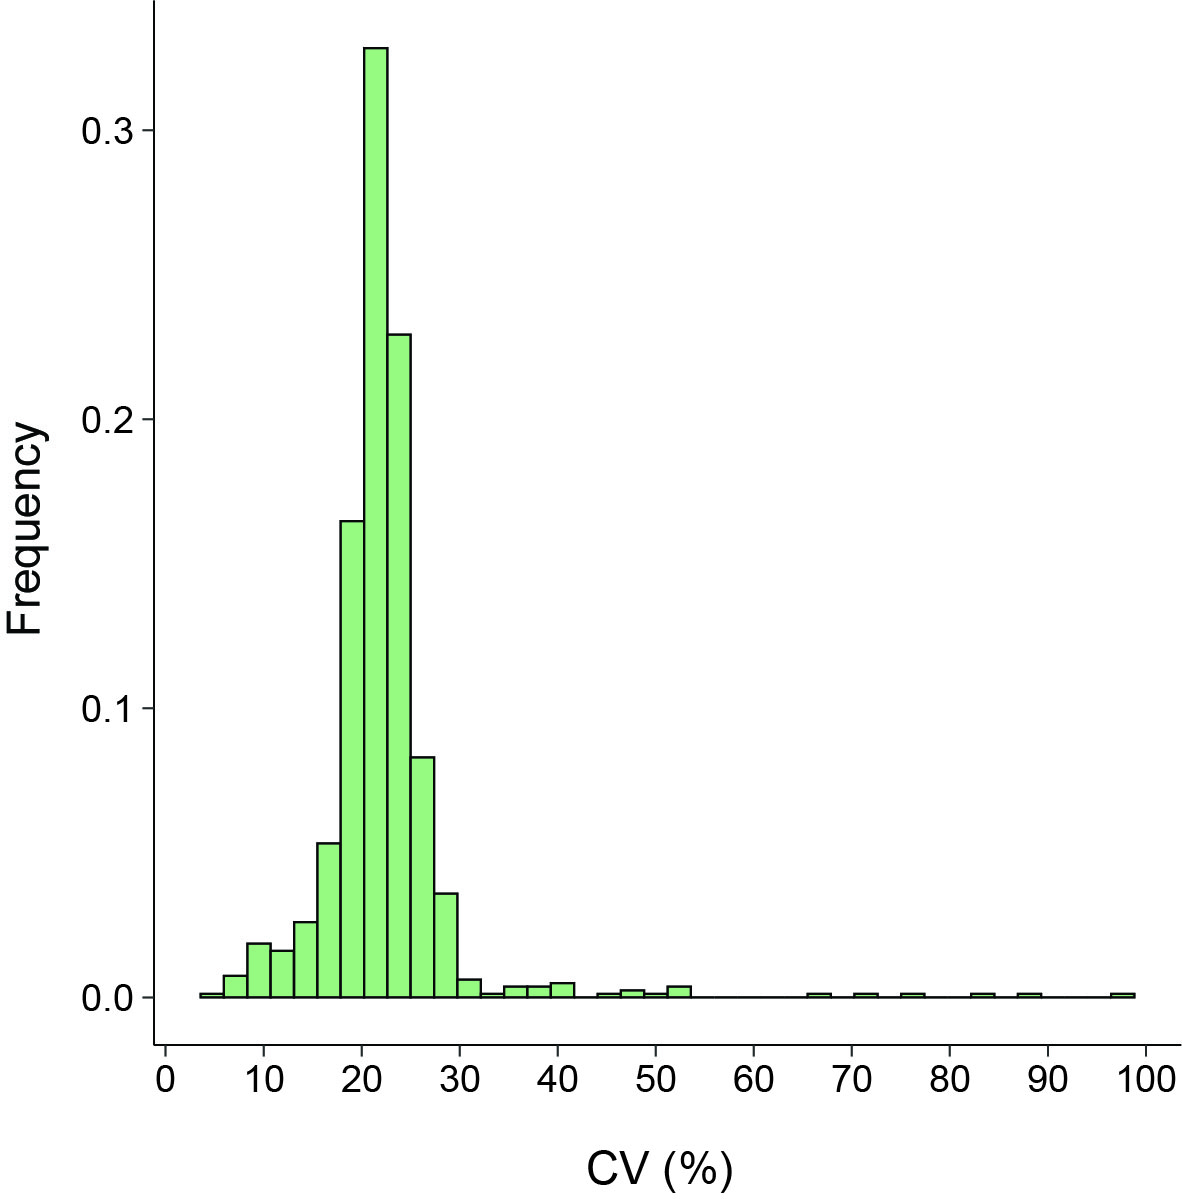

Supplement: supp [file elife-59726-supp-v1.zip › elife_poa_e59726_Figure_2_figure_supplement_2.jpg]

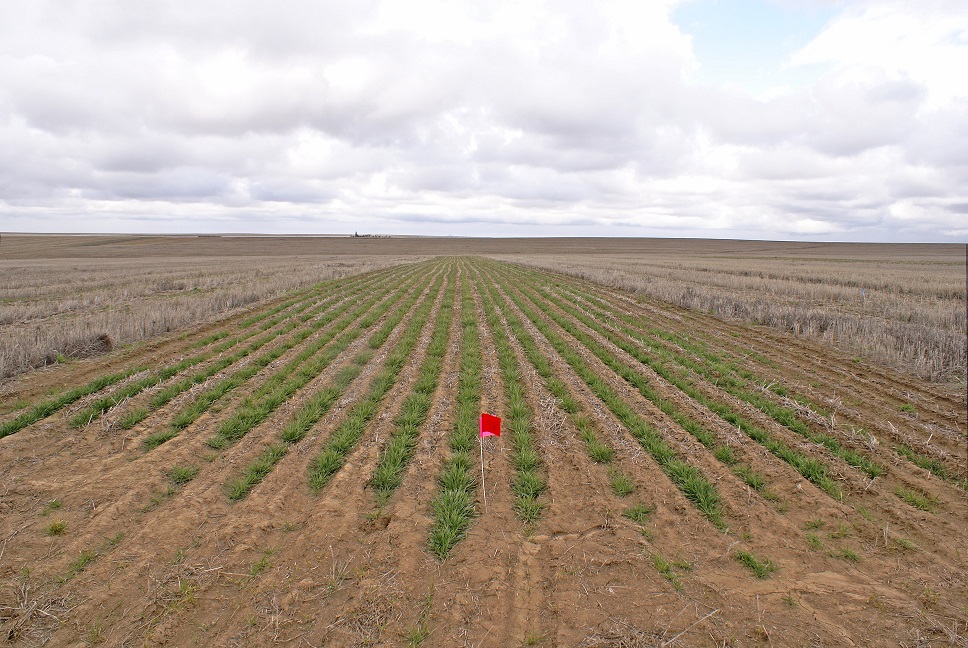

Supplement: supp [file elife-59726-supp-v1.zip › elife_poa_e59726_Figure_3_figure_supplement_1.jpg]

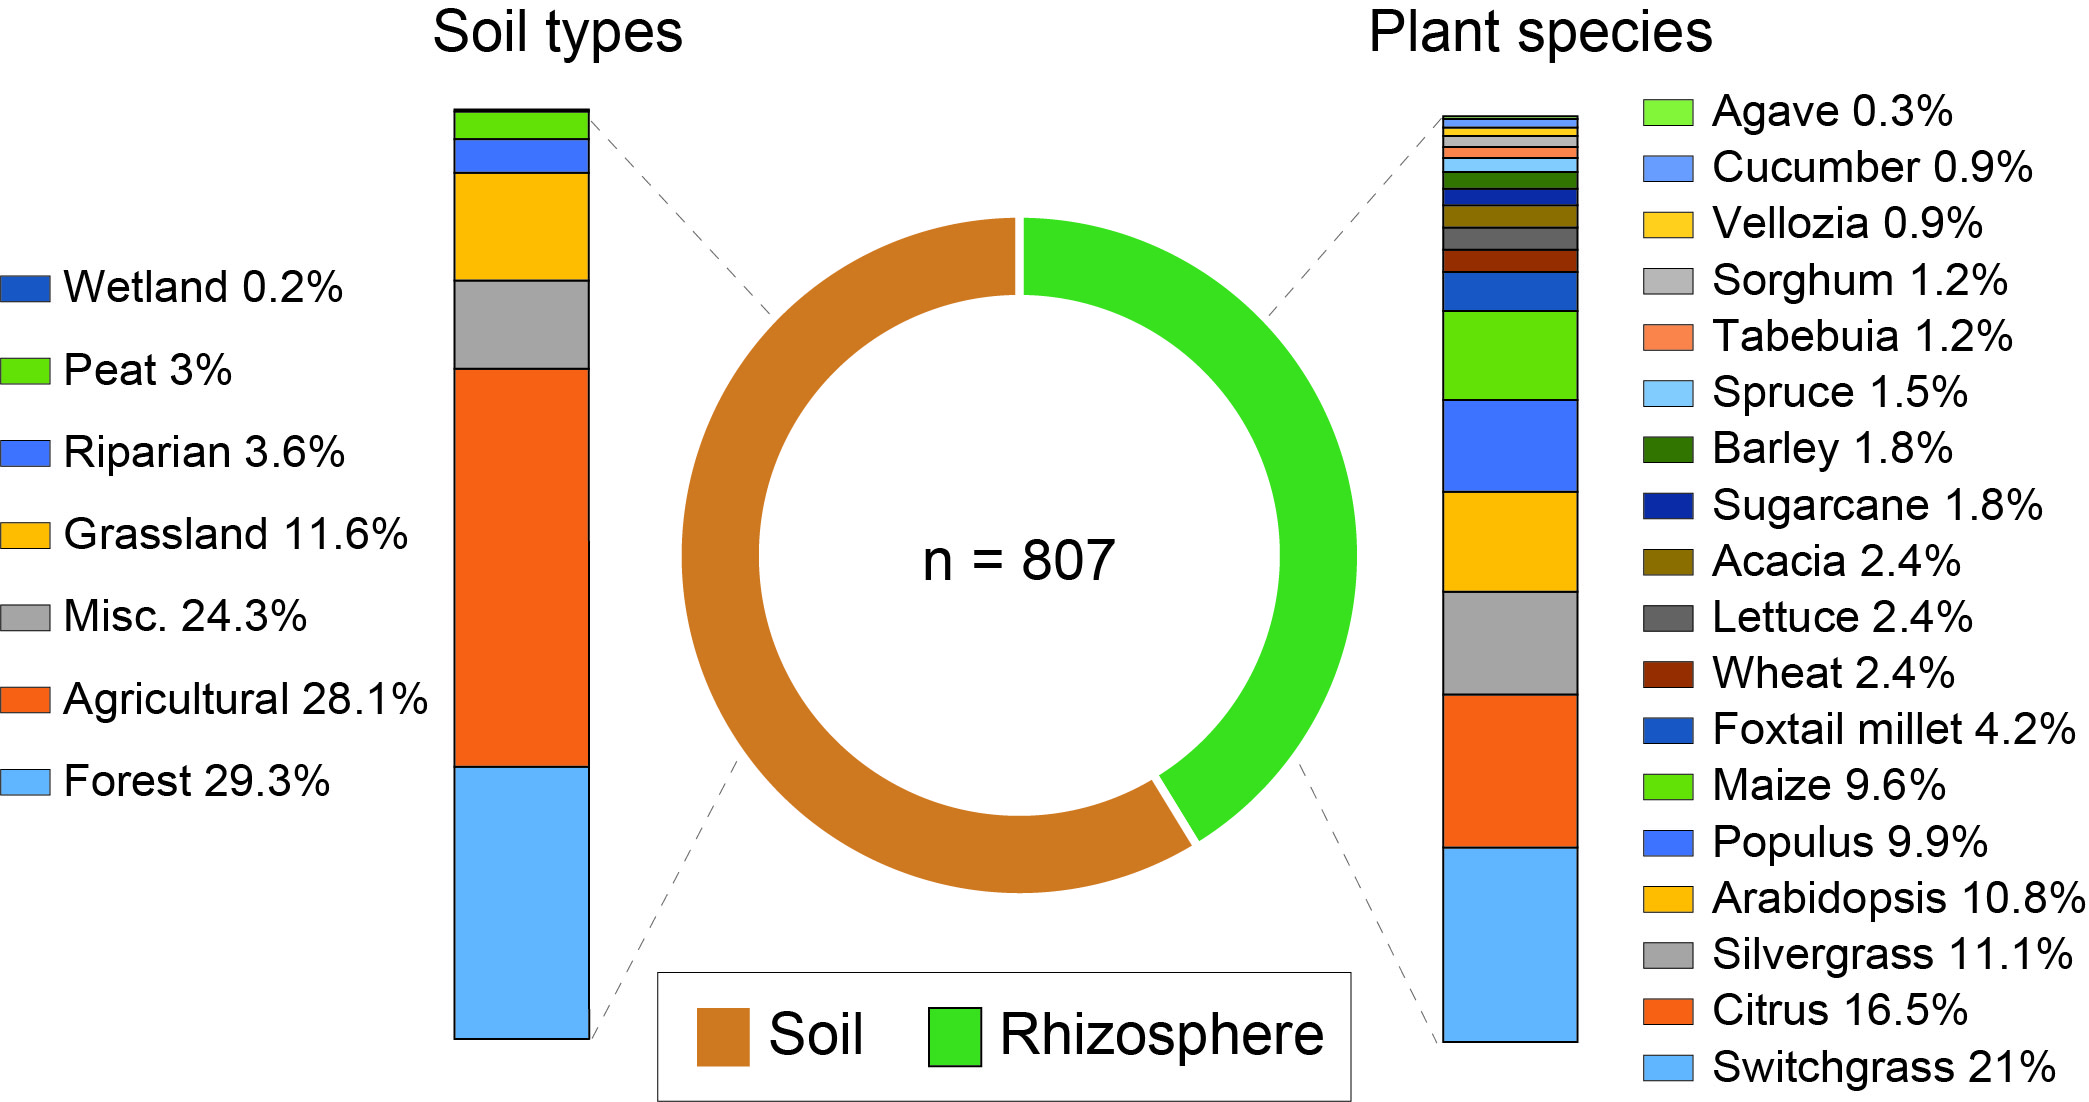

Supplement: supp [file elife-59726-supp-v1.zip › elife_poa_e59726_Figure_4_figure_supplement_1.jpg]

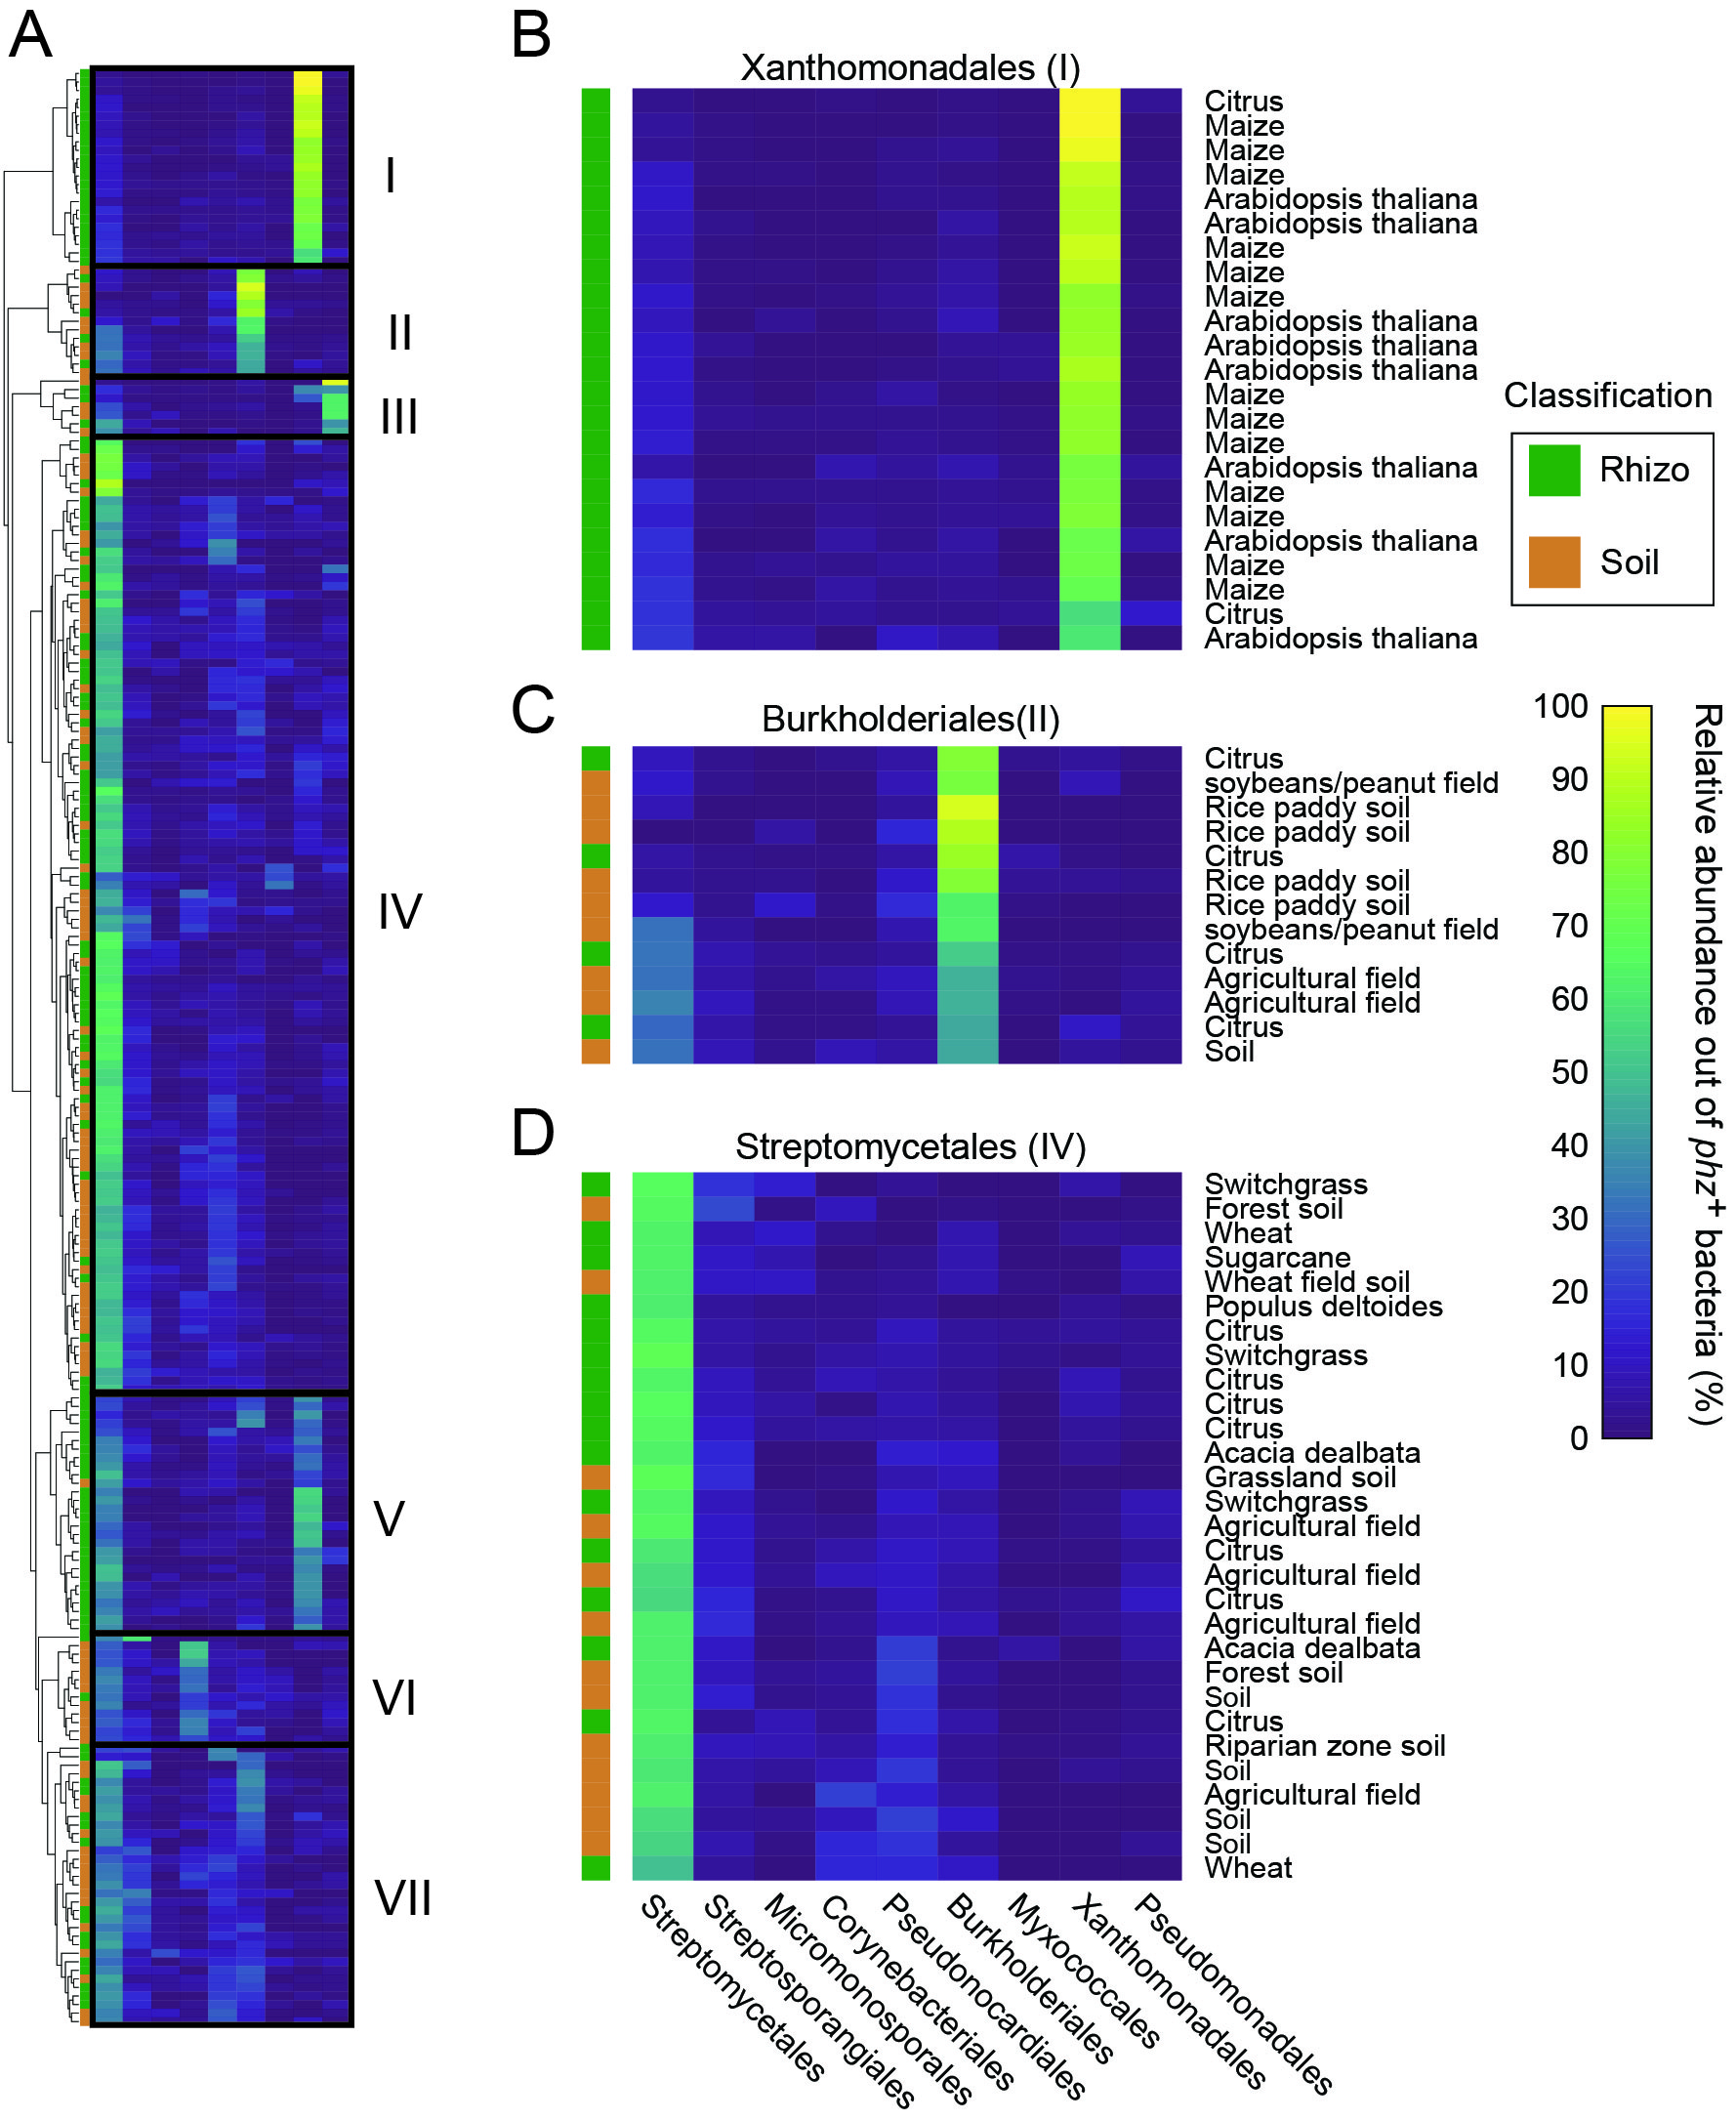

Supplement: supp [file elife-59726-supp-v1.zip › elife_poa_e59726_Figure_4_figure_supplement_2.jpg]

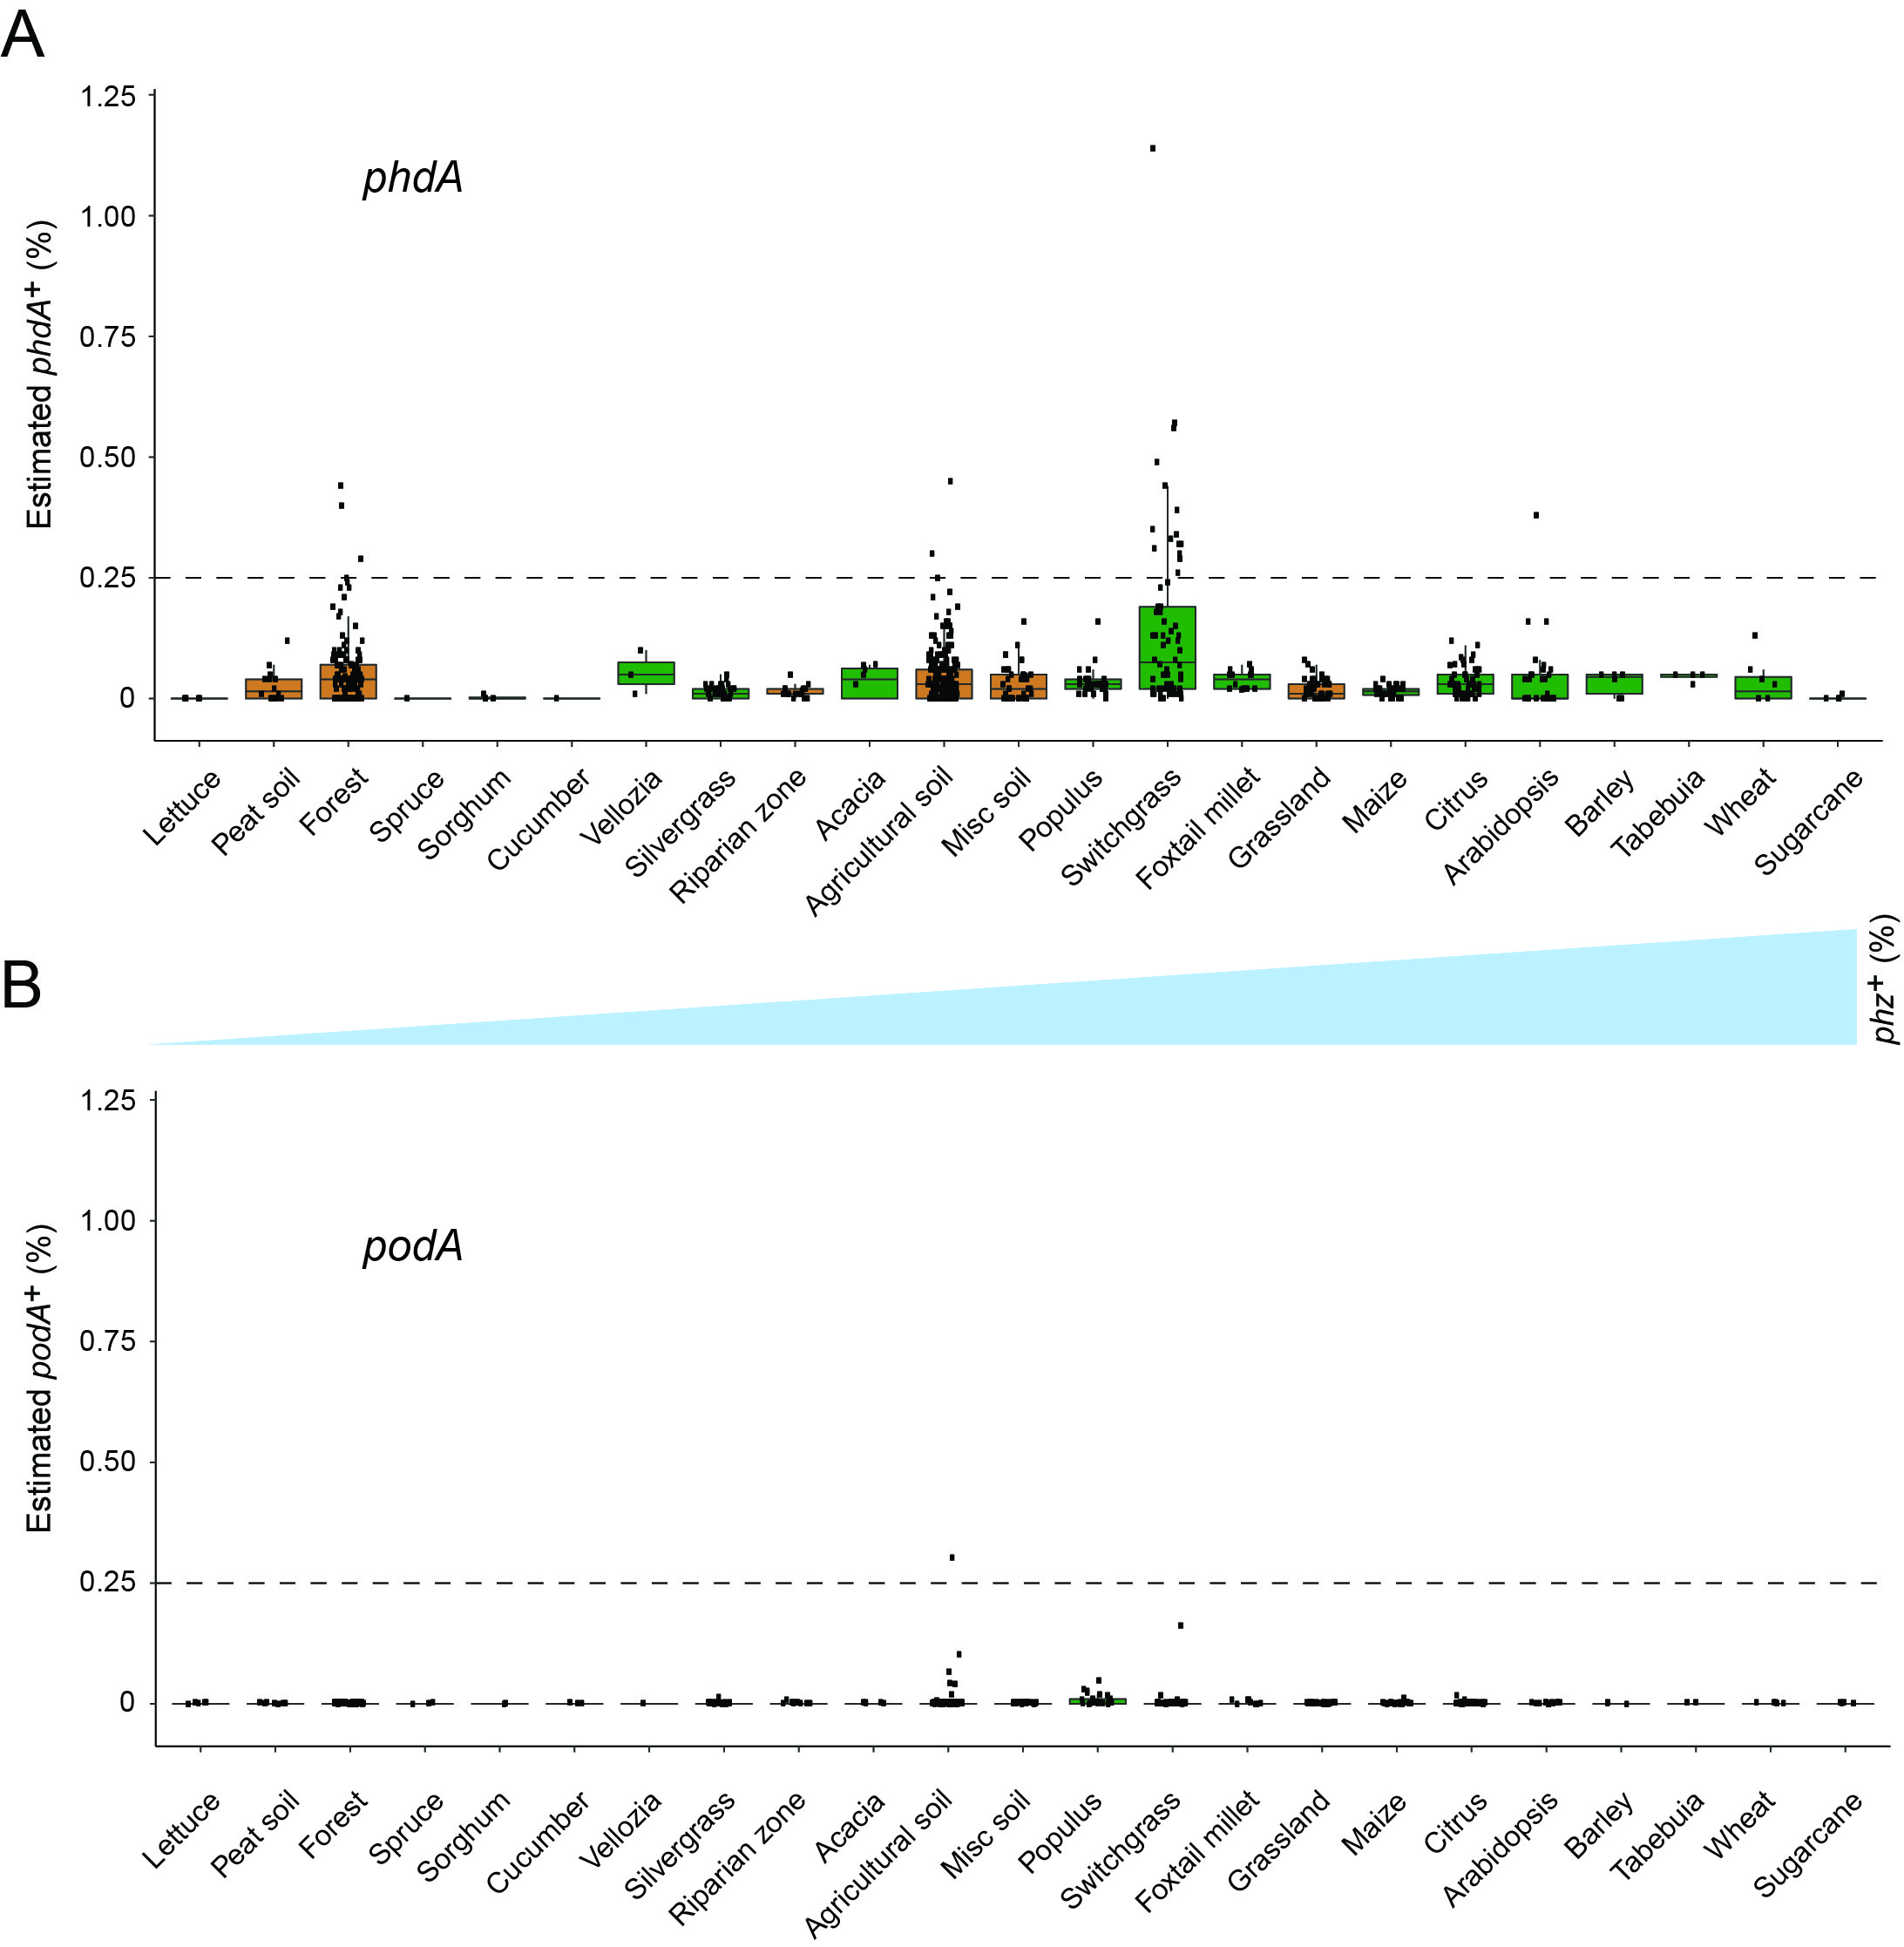

Supplement: supp [file elife-59726-supp-v1.zip › elife_poa_e59726_Figure_4_figure_supplement_3.jpg]

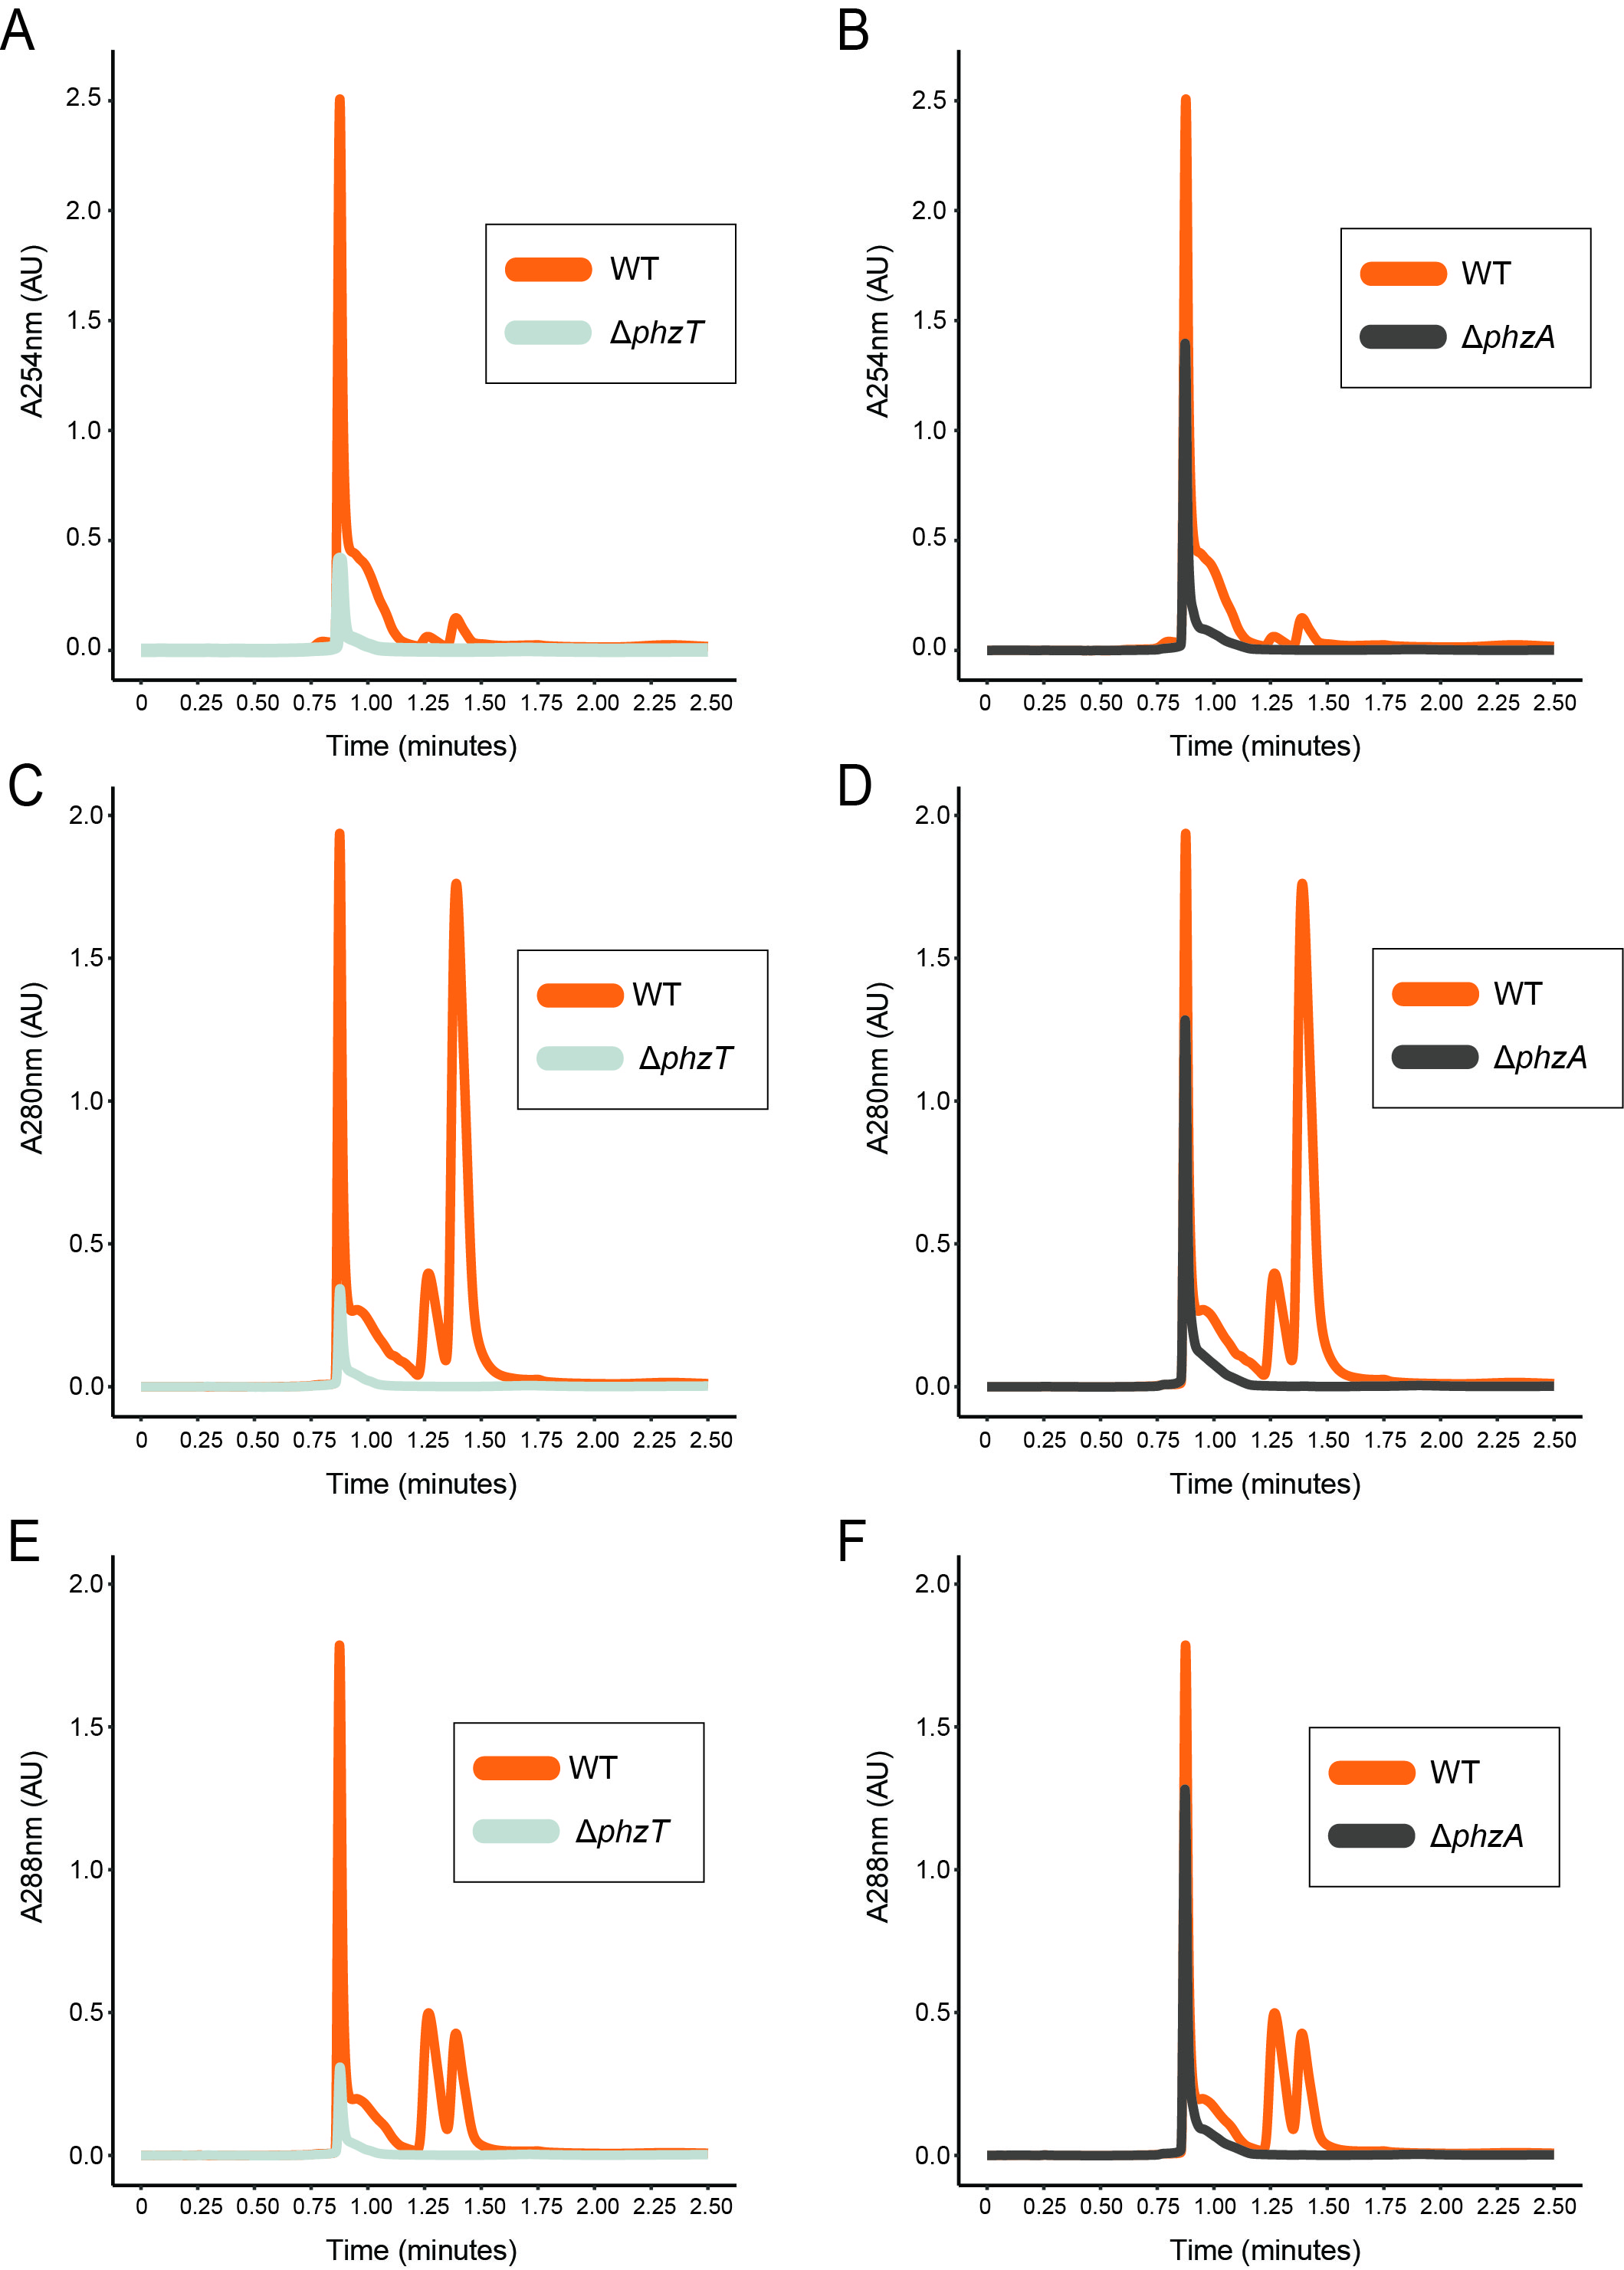

Supplement: supp [file elife-59726-supp-v1.zip › elife_poa_e59726_Figure_5_figure_supplement_1.jpg]

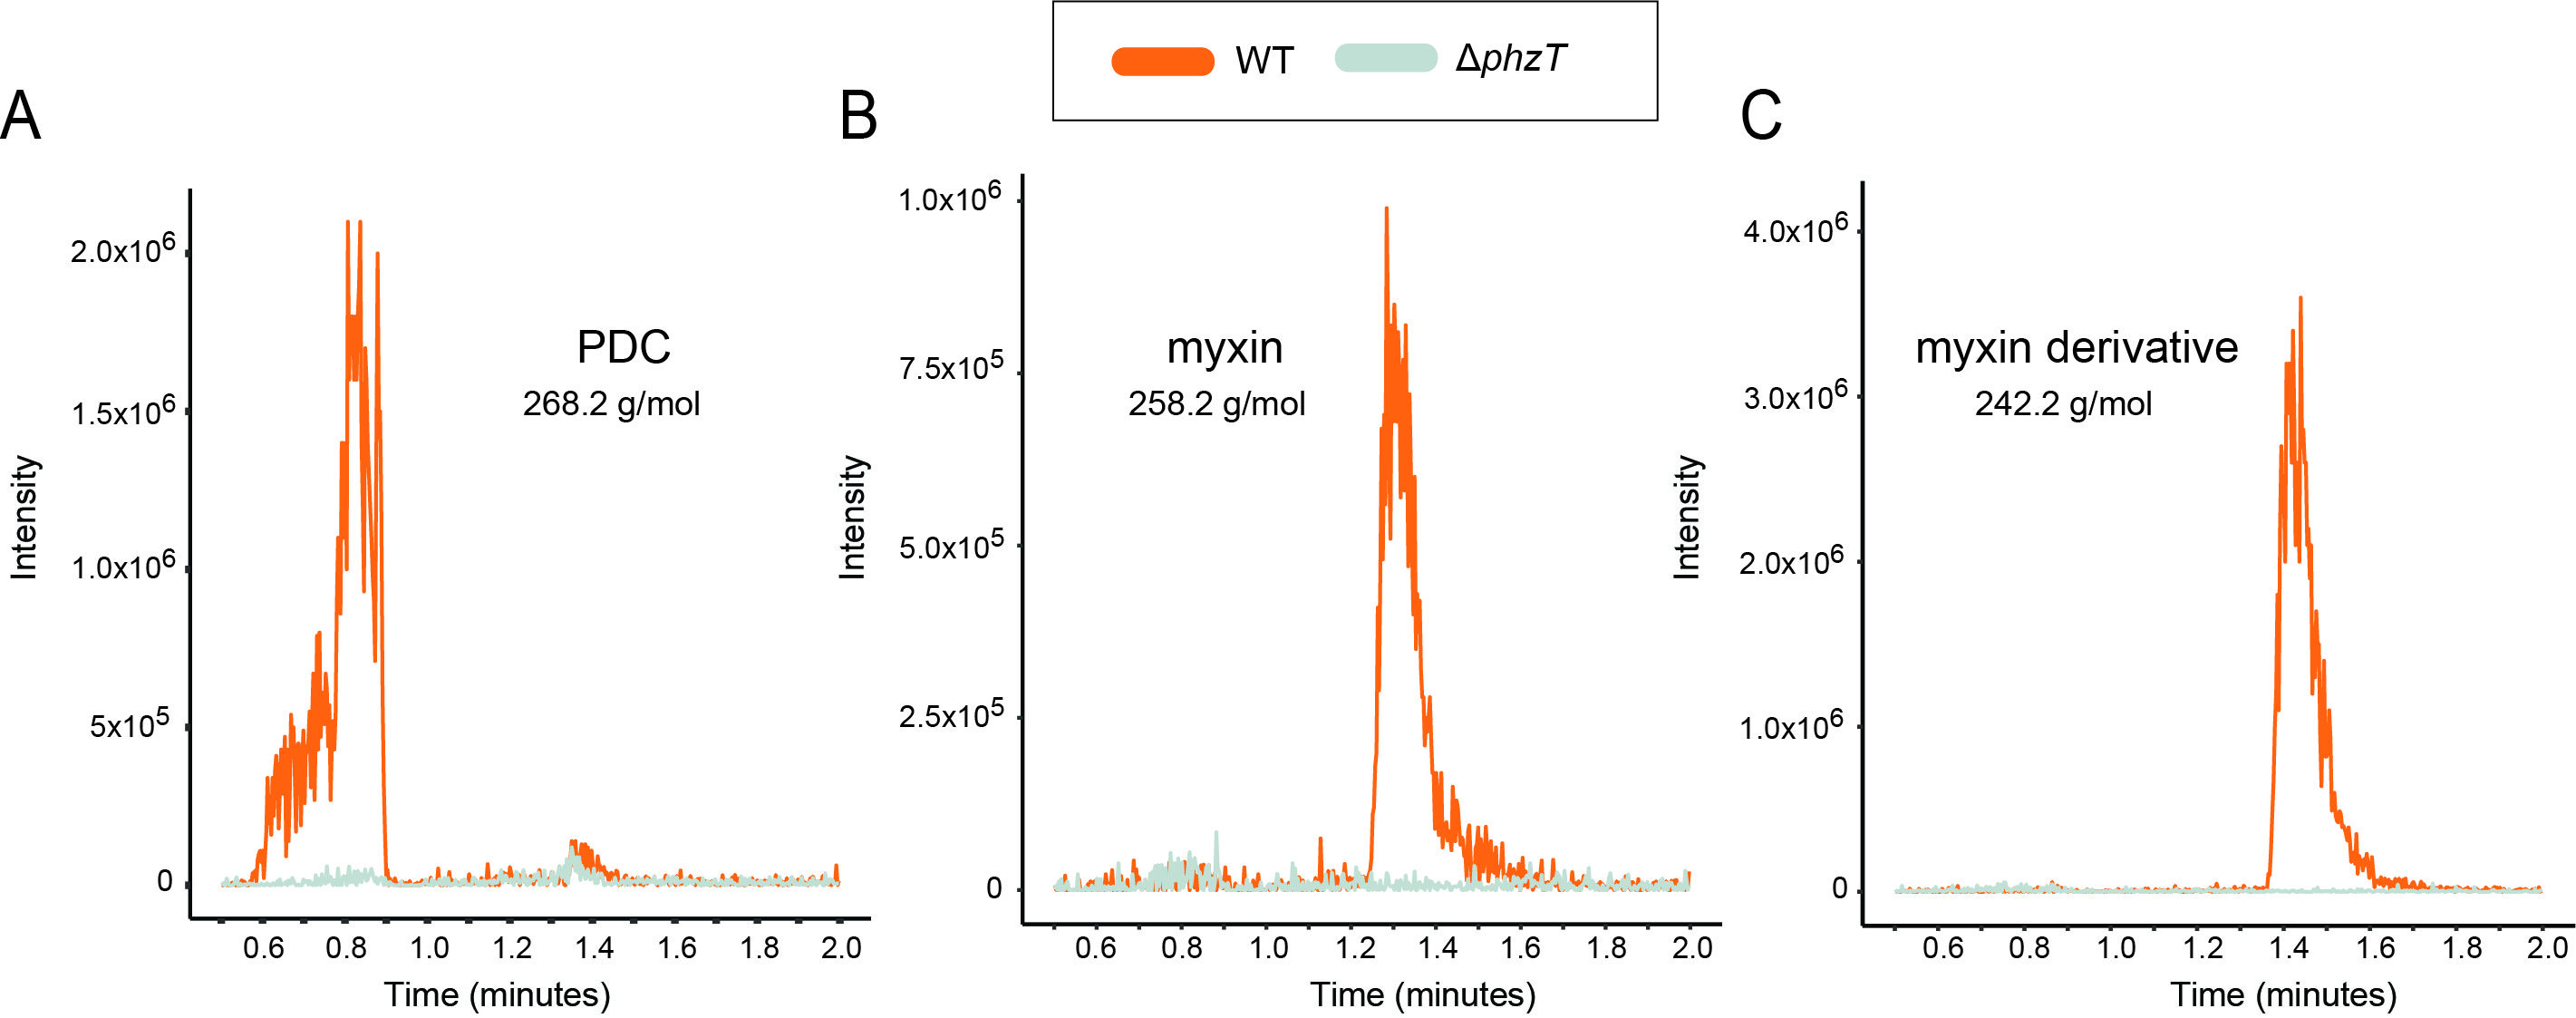

Supplement: supp [file elife-59726-supp-v1.zip › elife_poa_e59726_Figure_5_figure_supplement_2.jpg]
